# Supplementary material for: Humoral Immune Response Profile of COVID-19 Reveals Severity and Variant-Specific Epitopes: Lessons from SARS-CoV-2 Peptide Microarray
Source: MDPI journal article supplement (doi:10.3390/v15010248), 2023-01-15

**Supplementary Figure S1a:** Heatmap showing IgA response for peptide against orf1ab non-structural protein (nsp1, nsp2). The amino acid sequence of the corresponding protein is denoted as “aa1-15” and the COVID-19 patients included in the study are presented as p1-p12. Immunogenic response against the peptide was visualised using Z-score of fluorescence intensity. Peptides with a Z-score greater than 3 in at least one COVID-19 patients was defined as immunogenic.

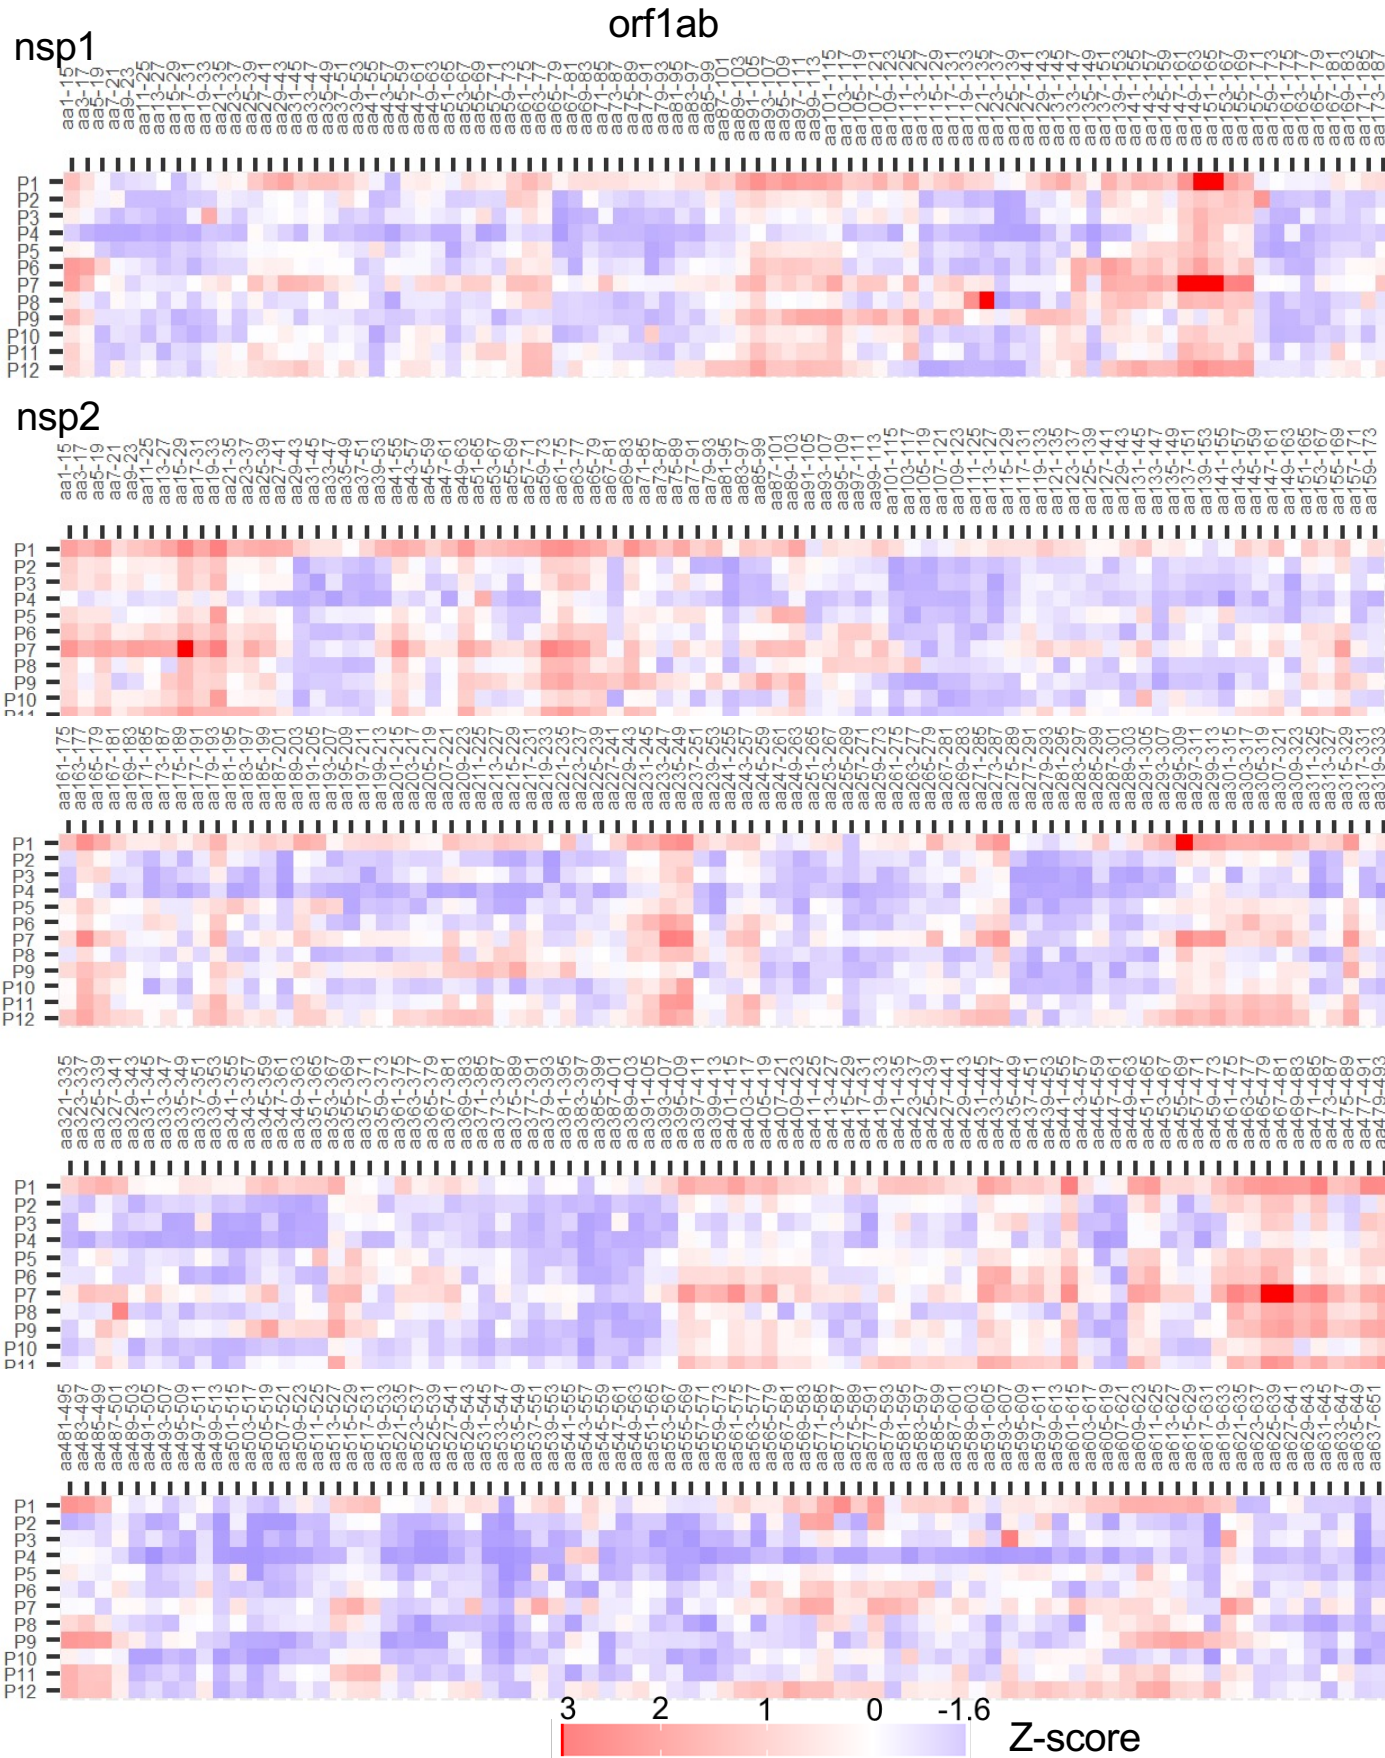



**Supplementary Figure S1b:** Heatmap showing IgA response for peptide against orf1ab non-structural protein (nsp3). The amino acid sequence of the corresponding protein is denoted as “aa1-15” and the COVID-19 patients included in the study are presented as p1-p12. Immunogenic response against the peptide was visualised using Z-score of fluorescence intensity. Peptides with a Z-score greater than 3 in at least one COVID-19 patients was defined as immunogenic.

nsp3

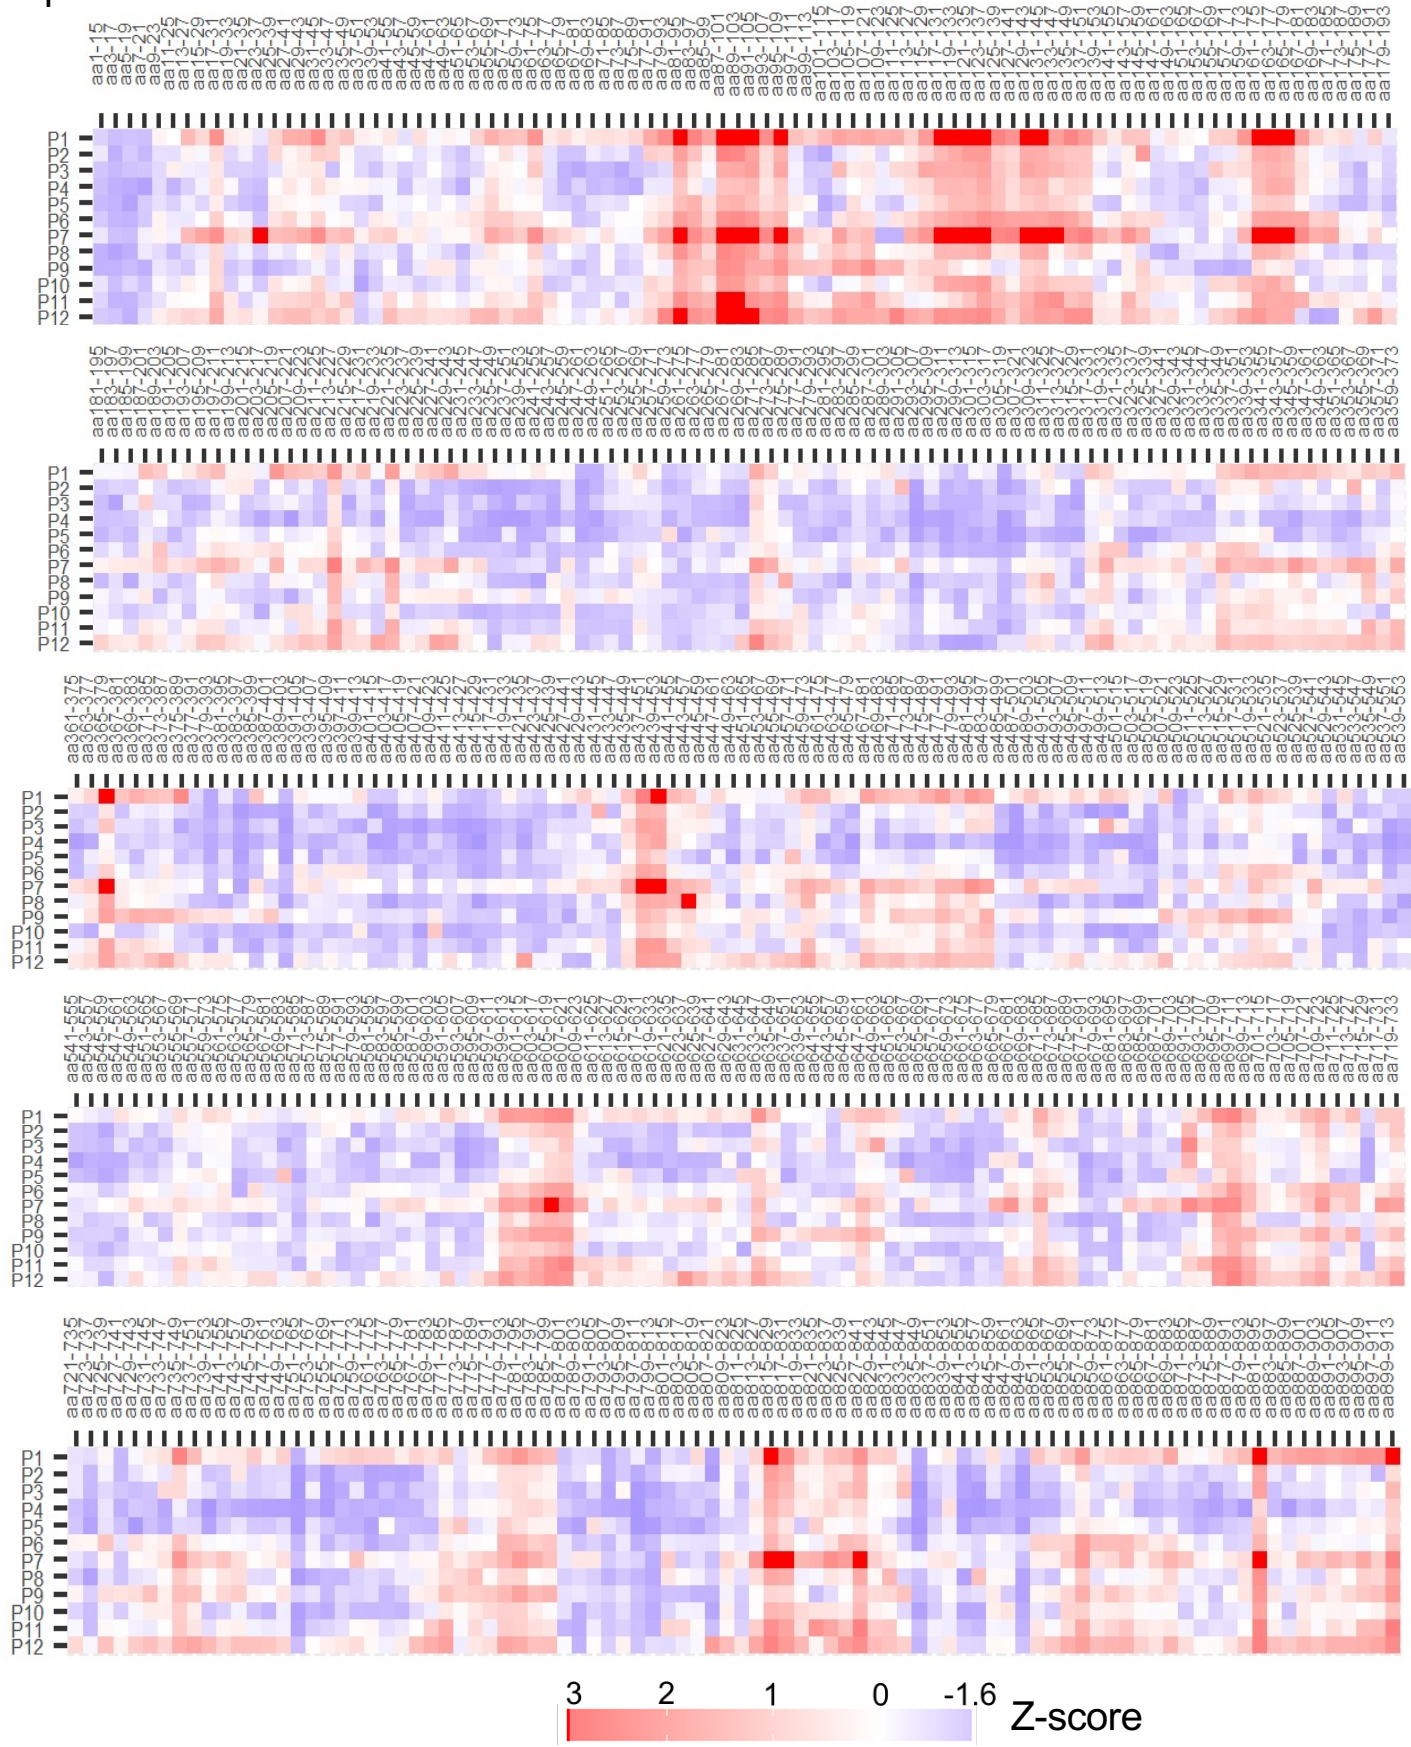



Supplementary Figure S1b contd...nsp3

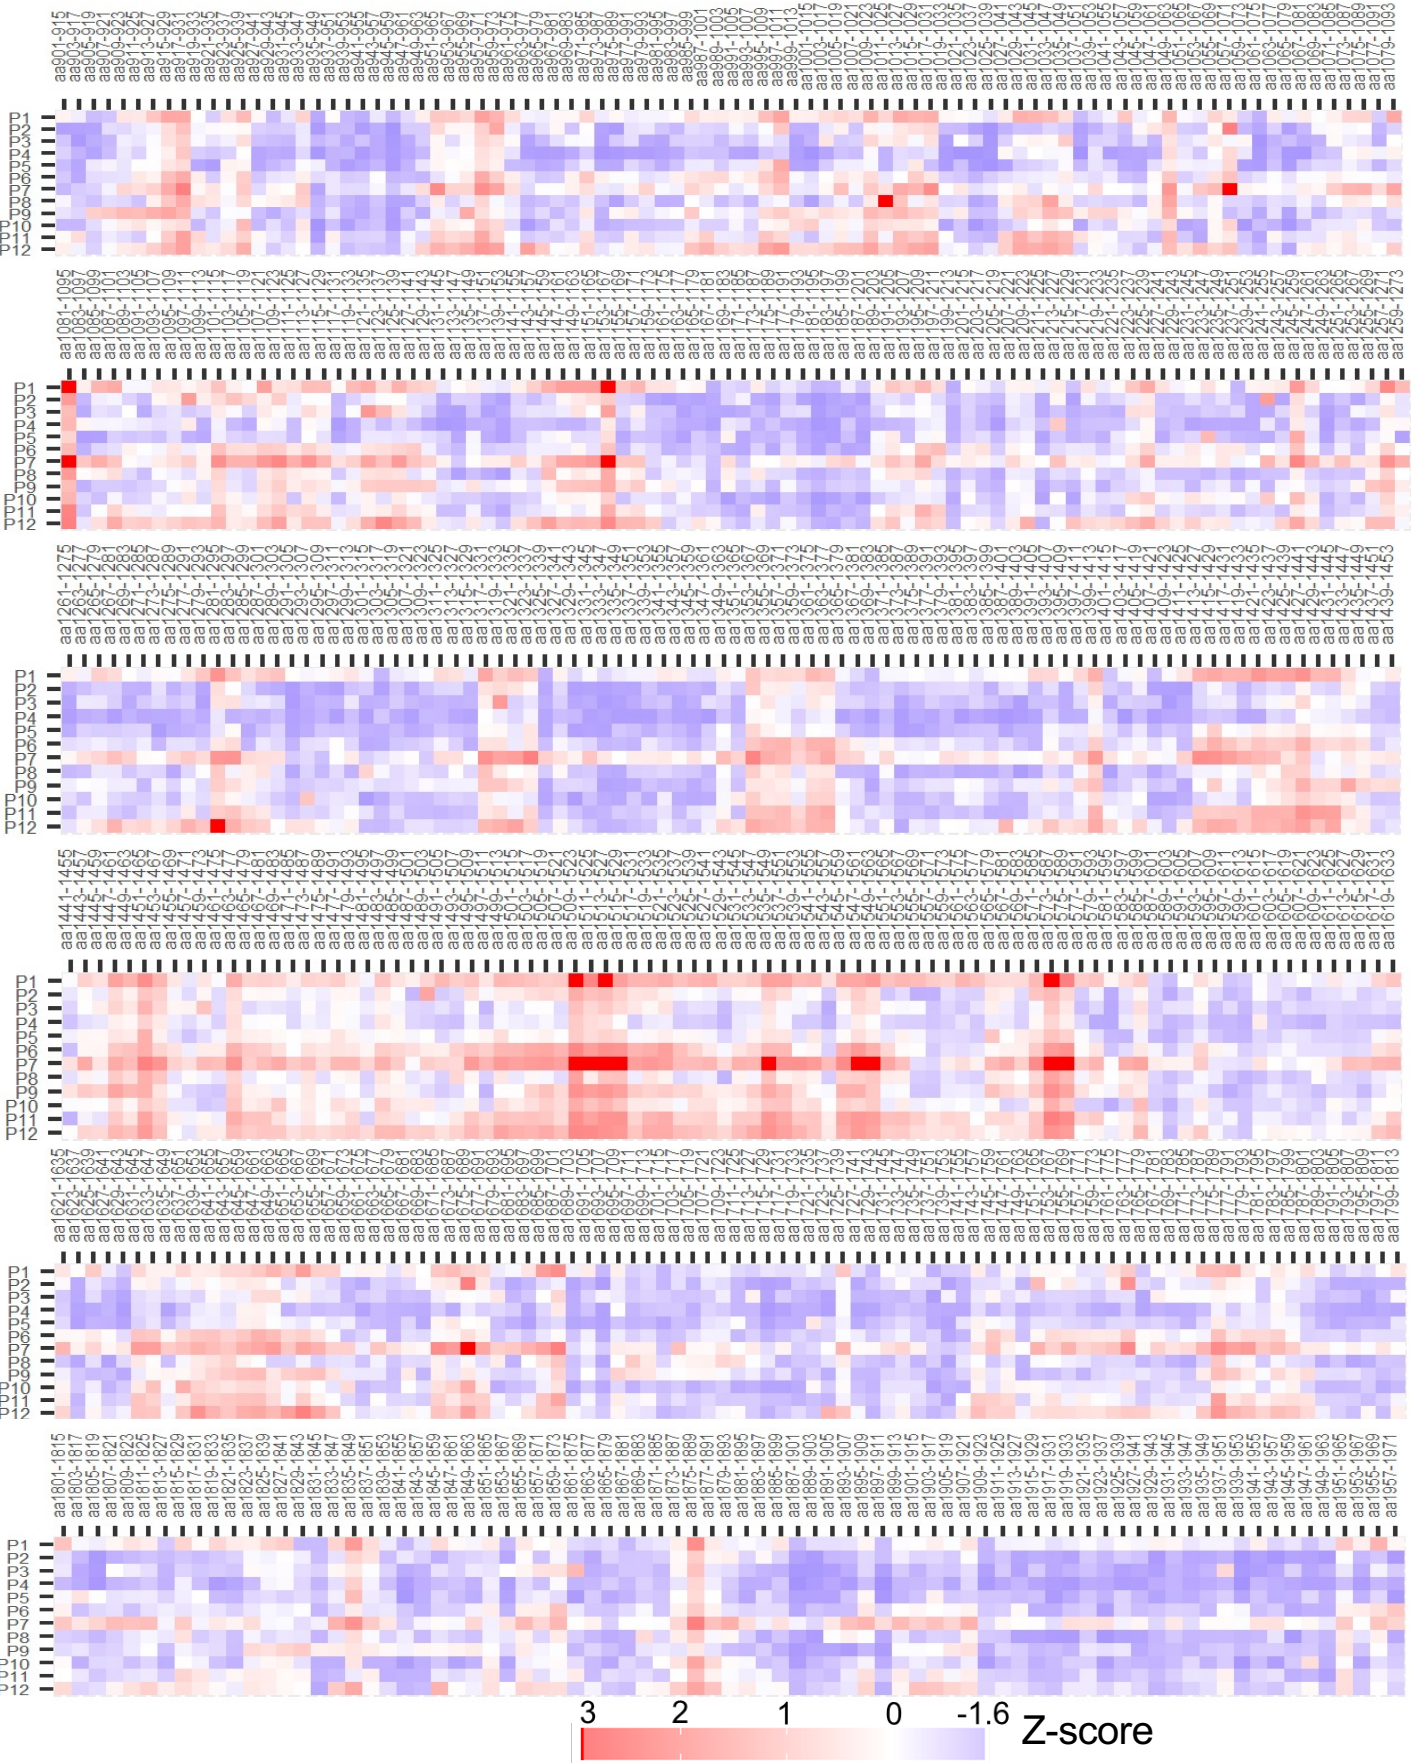



**Supplementary Figure S1c:** Heatmap showing IgA response for peptide against orf1ab non-structural protein (nsp4, nsp5). The amino acid sequence of the corresponding protein is denoted as “aa1-15” and the COVID-19 patients included in the study are presented as p1-p12. Immunogenic response against the peptide was visualised using Z-score of fluorescence intensity. Peptides with a Z-score greater than 3 in at least one COVID-19 patients was defined as immunogenic.

nsp4

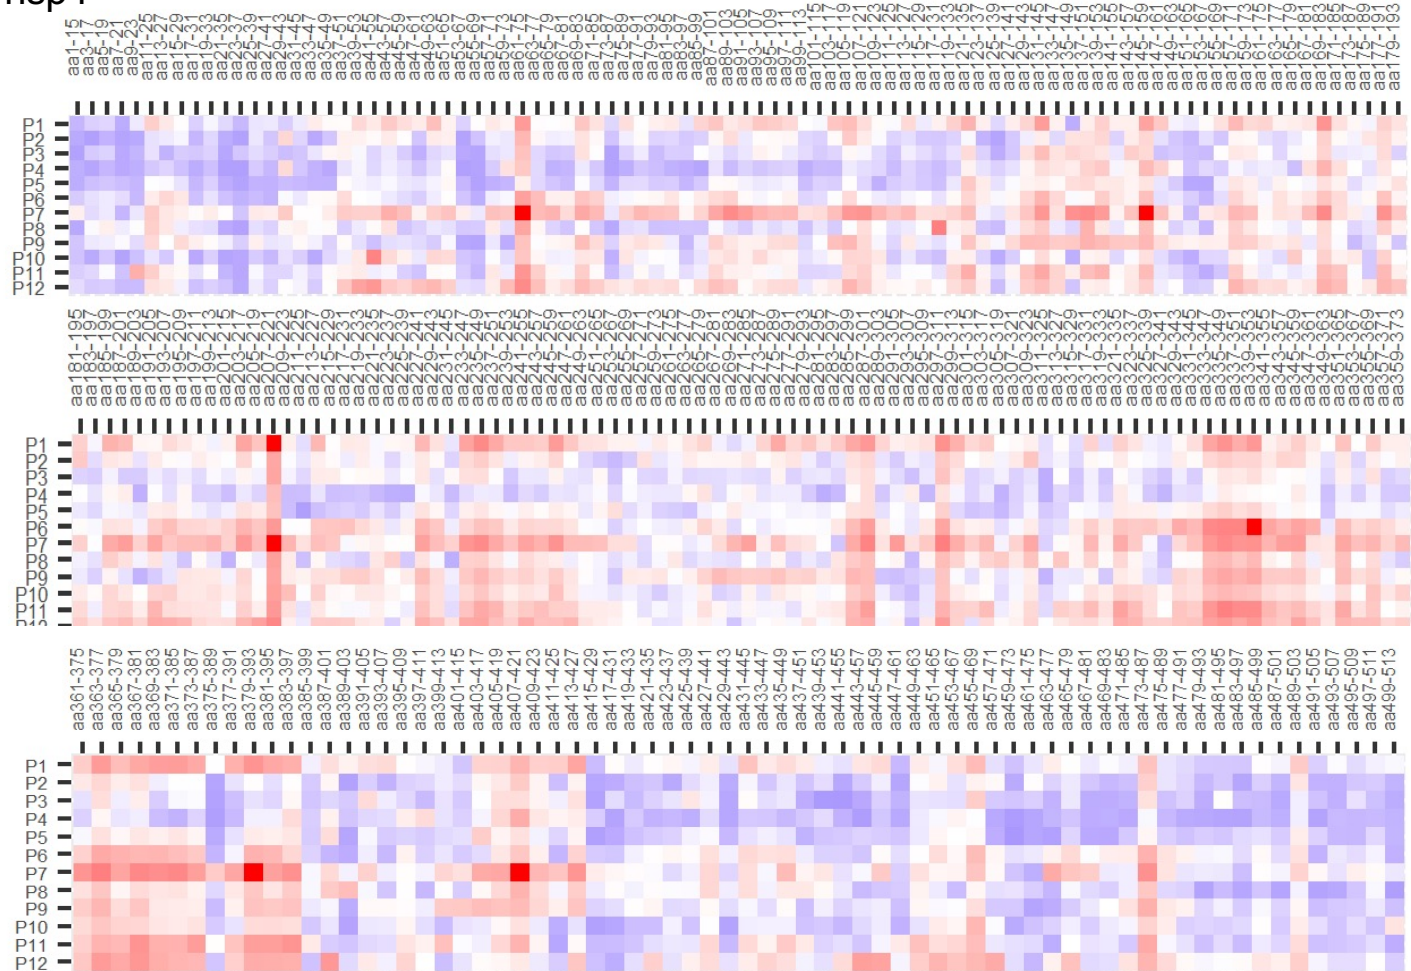

nsp5

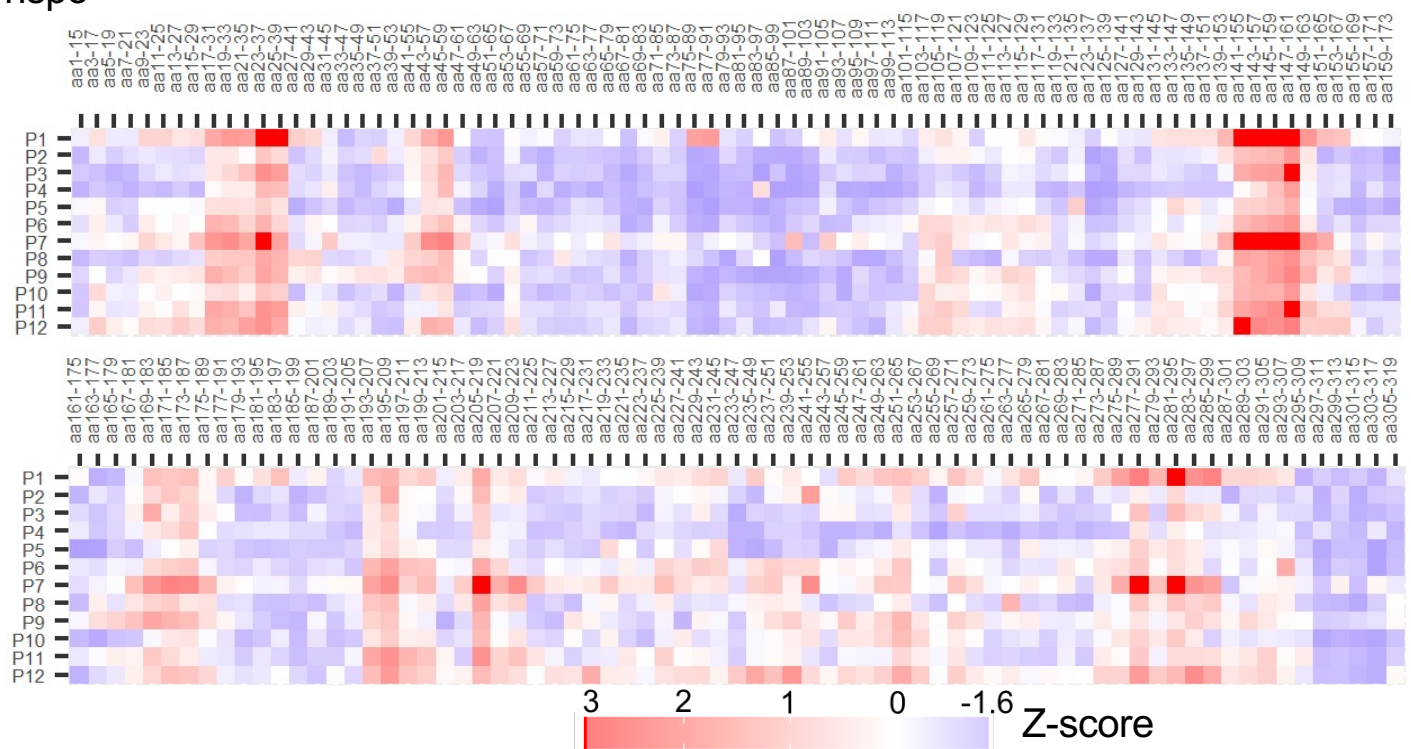



**Supplementary Figure S1d:** Heatmap showing IgA response for peptide against orf1ab non-structural protein (nsp6, nsp7, nsp8, nsp9). The amino acid sequence of the corresponding protein is denoted as “aa1-15” and the COVID-19 patients included in the study are presented as p1-p12. Immunogenic response against the peptide was visualised using Z-score of fluorescence intensity. Peptides with a Z-score greater than 3 in at least one COVID-19 patients was defined as immunogenic.

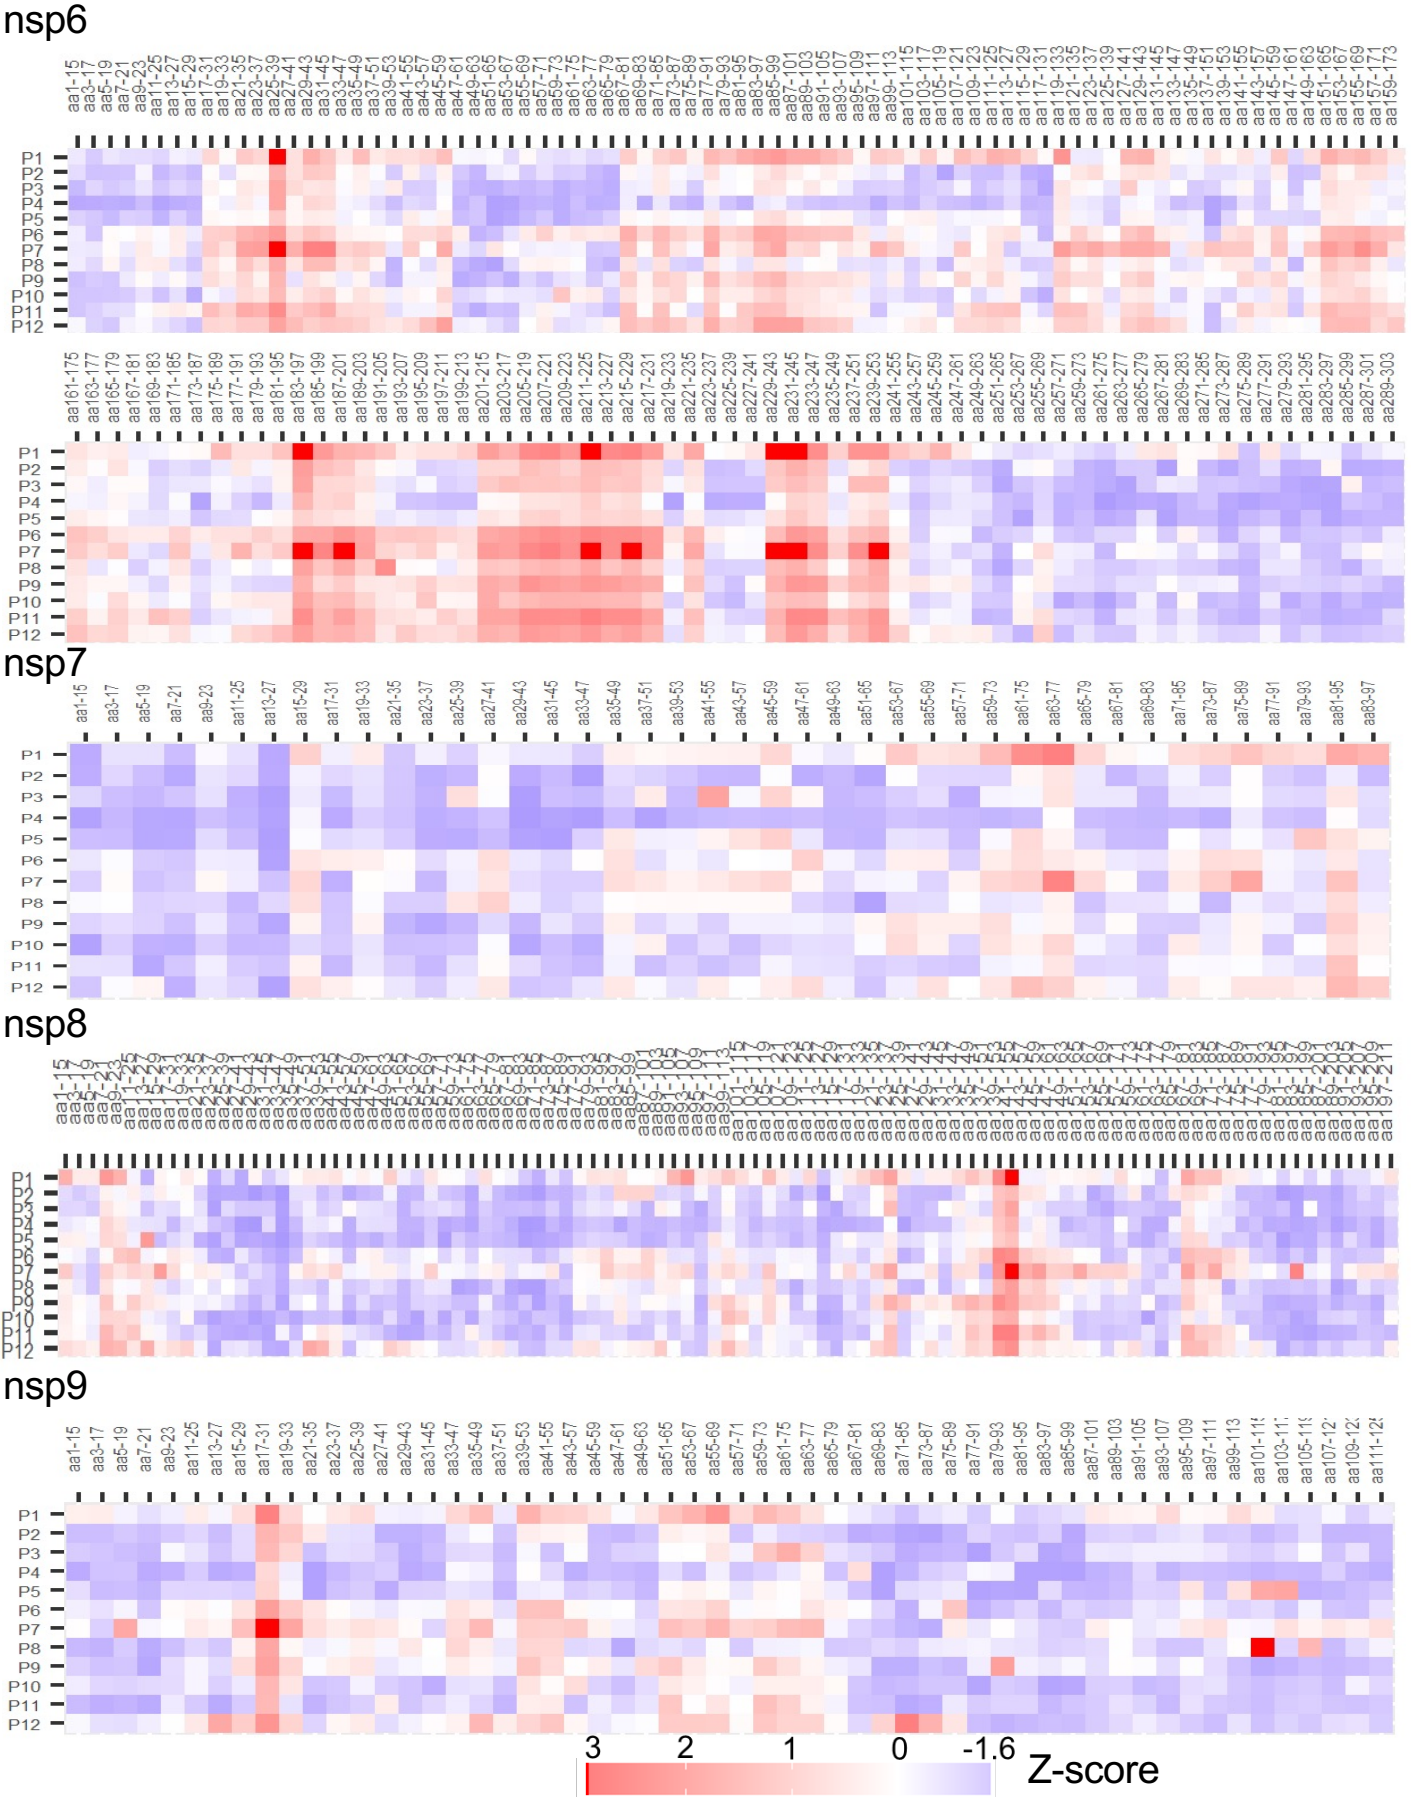



**Supplementary Figure S1e:** Heatmap showing IgA response for peptide against orf1ab non-structural protein (nsp10, nsp12). The amino acid sequence of the corresponding protein is denoted as “aa1-15” and the COVID-19 patients included in the study are presented as p1-p12. Immunogenic response against the peptide was visualised using Z-score of fluorescence intensity. Peptides with a Z-score greater than 3 in at least one COVID-19 patients was defined as immunogenic.

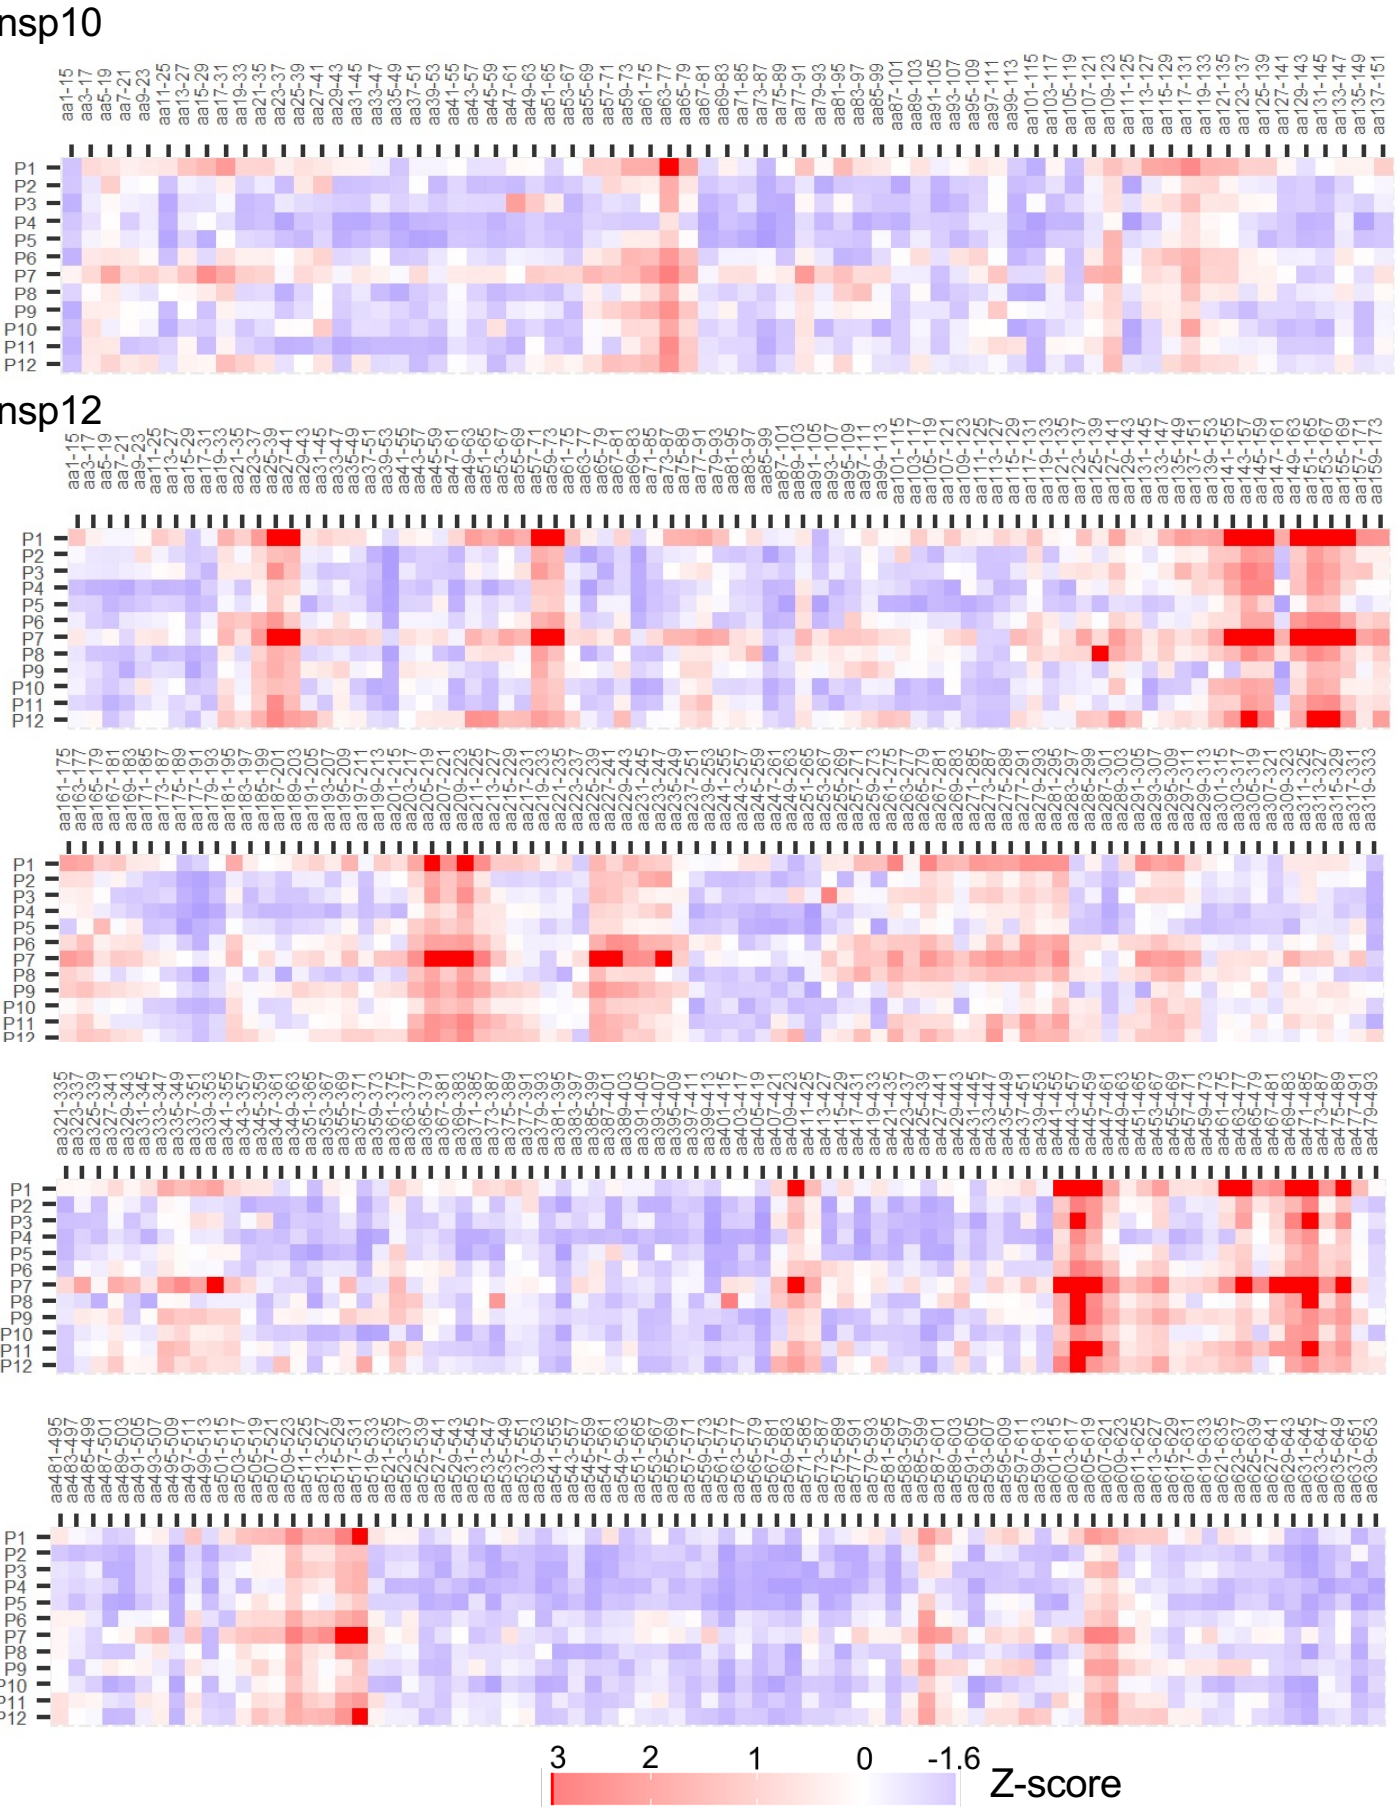



Supplementary Figure S1e contd...

nsp12

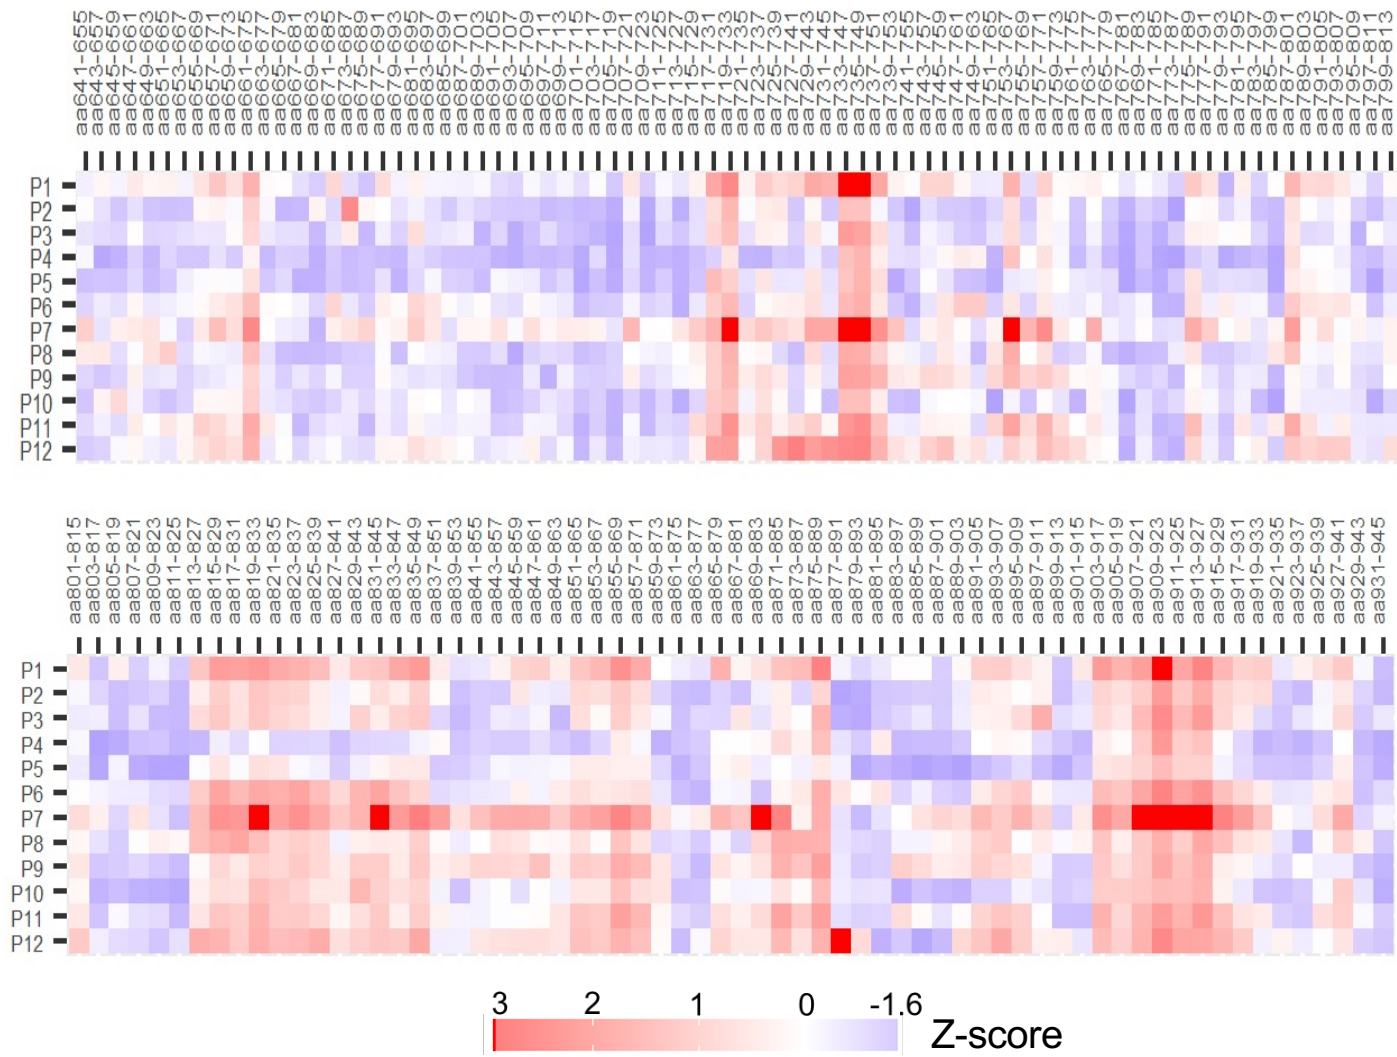



**Supplementary Figure S1f:** Heatmap showing IgA response for peptide against orf1ab non-structural protein (nsp13). The amino acid sequence of the corresponding protein is denoted as “aa1-15” and the COVID-19 patients included in the study are presented as p1-p12. Immunogenic response against the peptide was visualised using Z-score of fluorescence intensity. Peptides with a Z-score greater than 3 in at least one COVID-19 patients was defined as immunogenic.

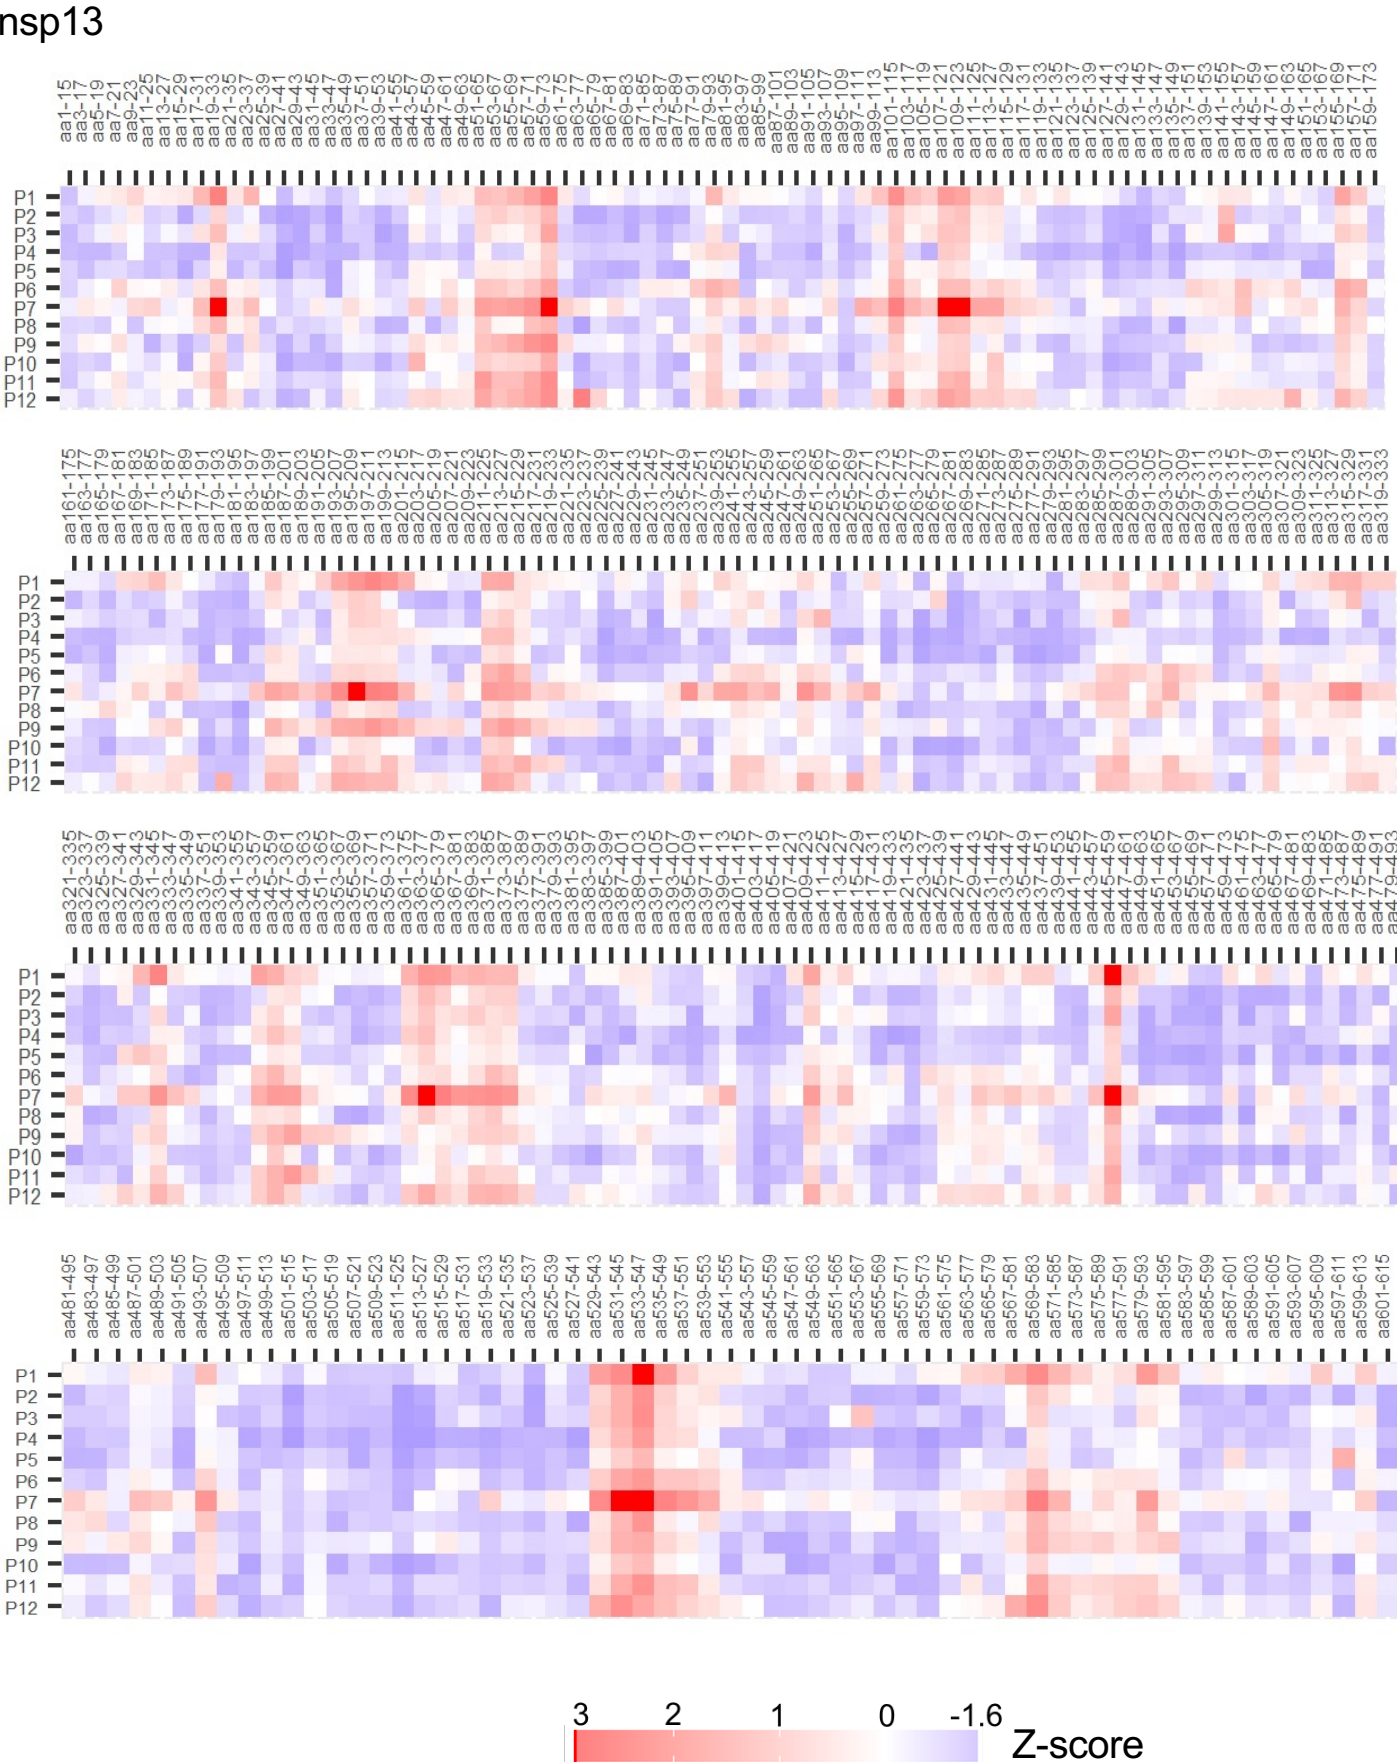



**Supplementary Figure S1g:** Heatmap showing IgA response for peptide against orf1ab non-structural protein (nsp14, nsp15). The amino acid sequence of the corresponding protein is denoted as “aa1-15” and the COVID-19 patients included in the study are presented as p1-p12. Immunogenic response against the peptide was visualised using Z-score of fluorescence intensity. Peptides with a Z-score greater than 3 in at least one COVID-19 patients was defined as immunogenic.

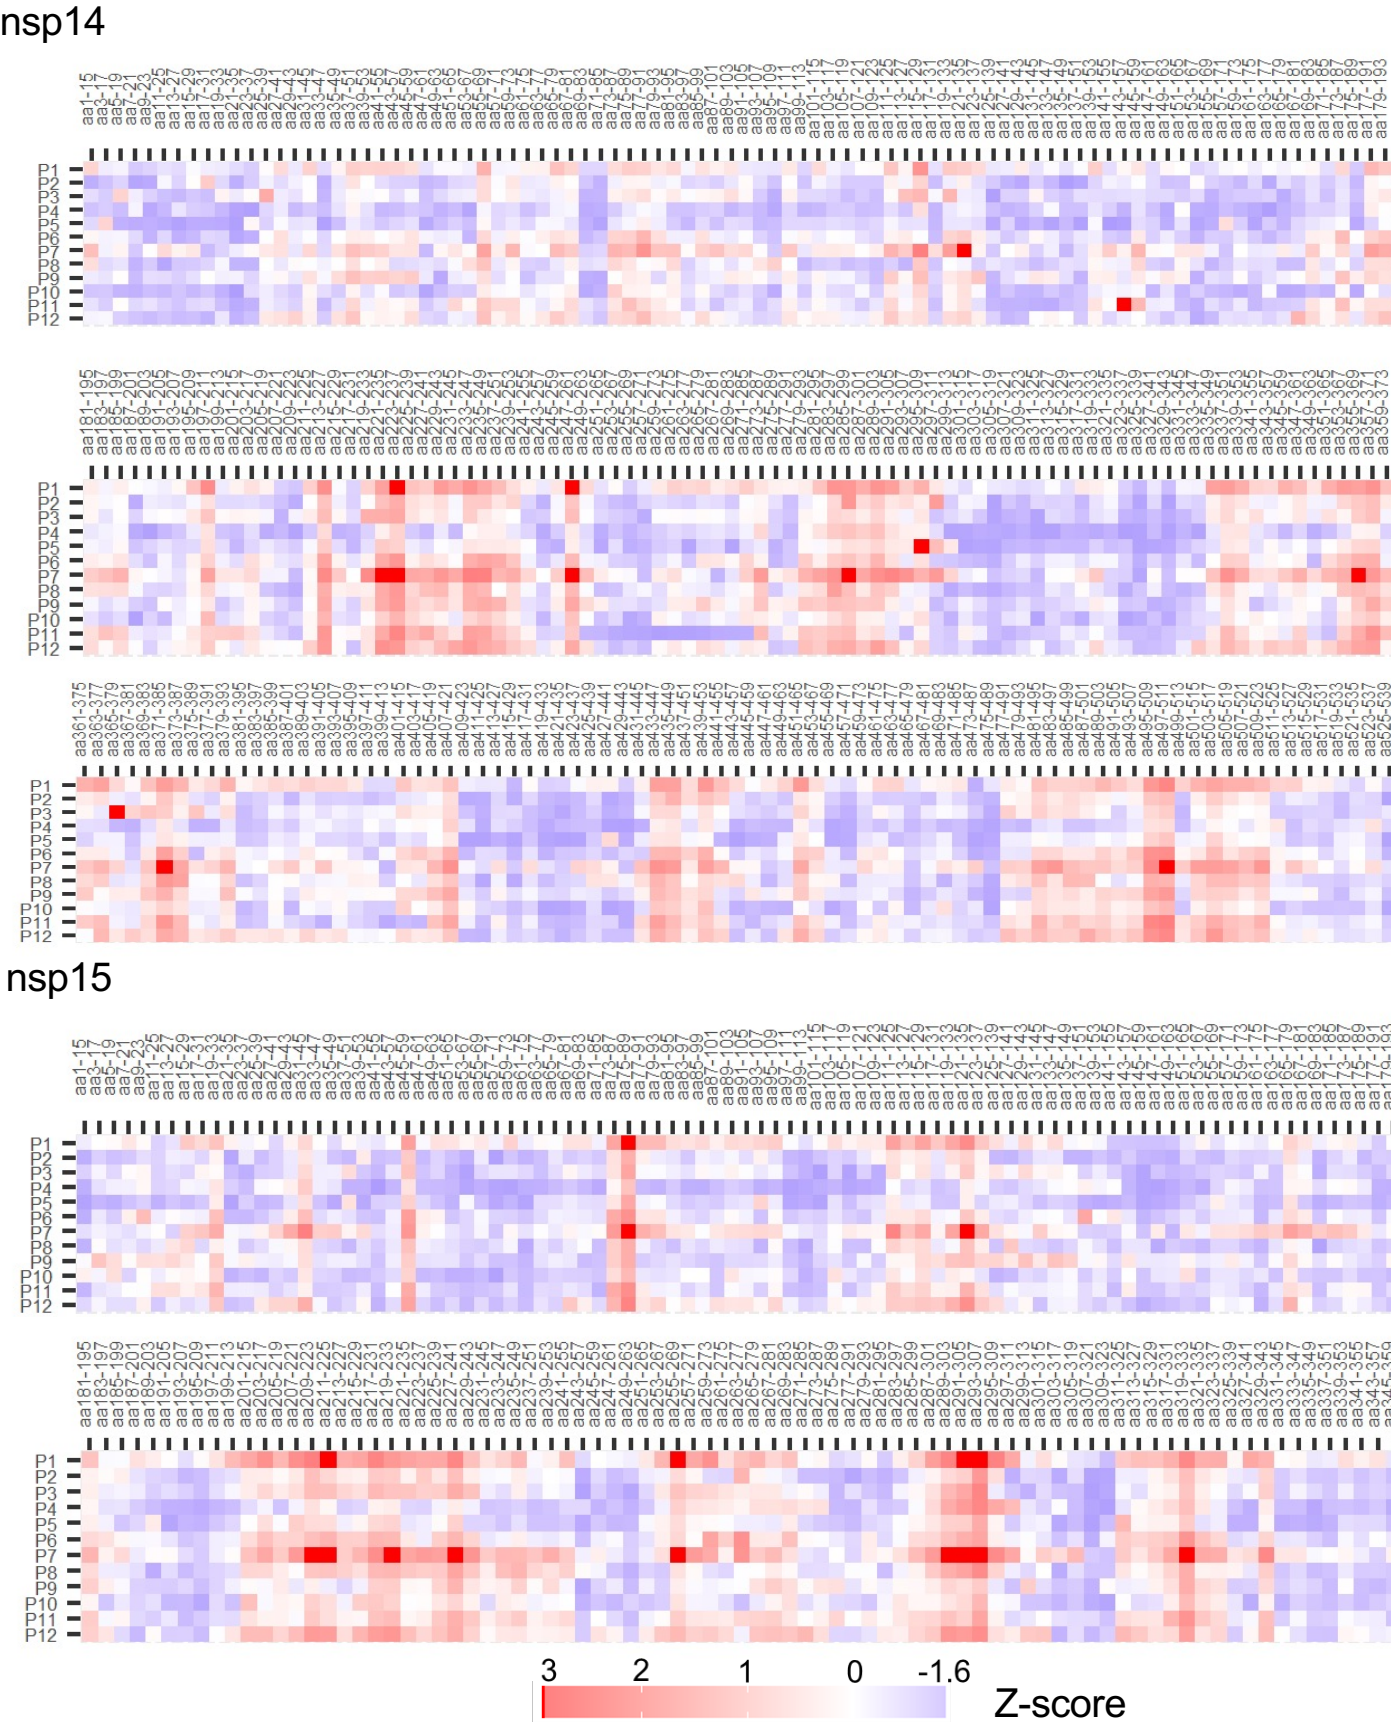



**Supplementary Figure S1h:** Heatmap showing IgA response for peptide against orf1ab non-structural, structural and accessory proteins (nsp16, membrane, envelop and orf8). The amino acid sequence of the corresponding protein is denoted as “aa1-15” and the COVID-19 patients included in the study are presented as p1-p12. Immunogenic response against the peptide was visualised using Z-score of fluorescence intensity. Peptides with a Z-score greater than 3 in at least one COVID-19 patients was defined as immunogenic.

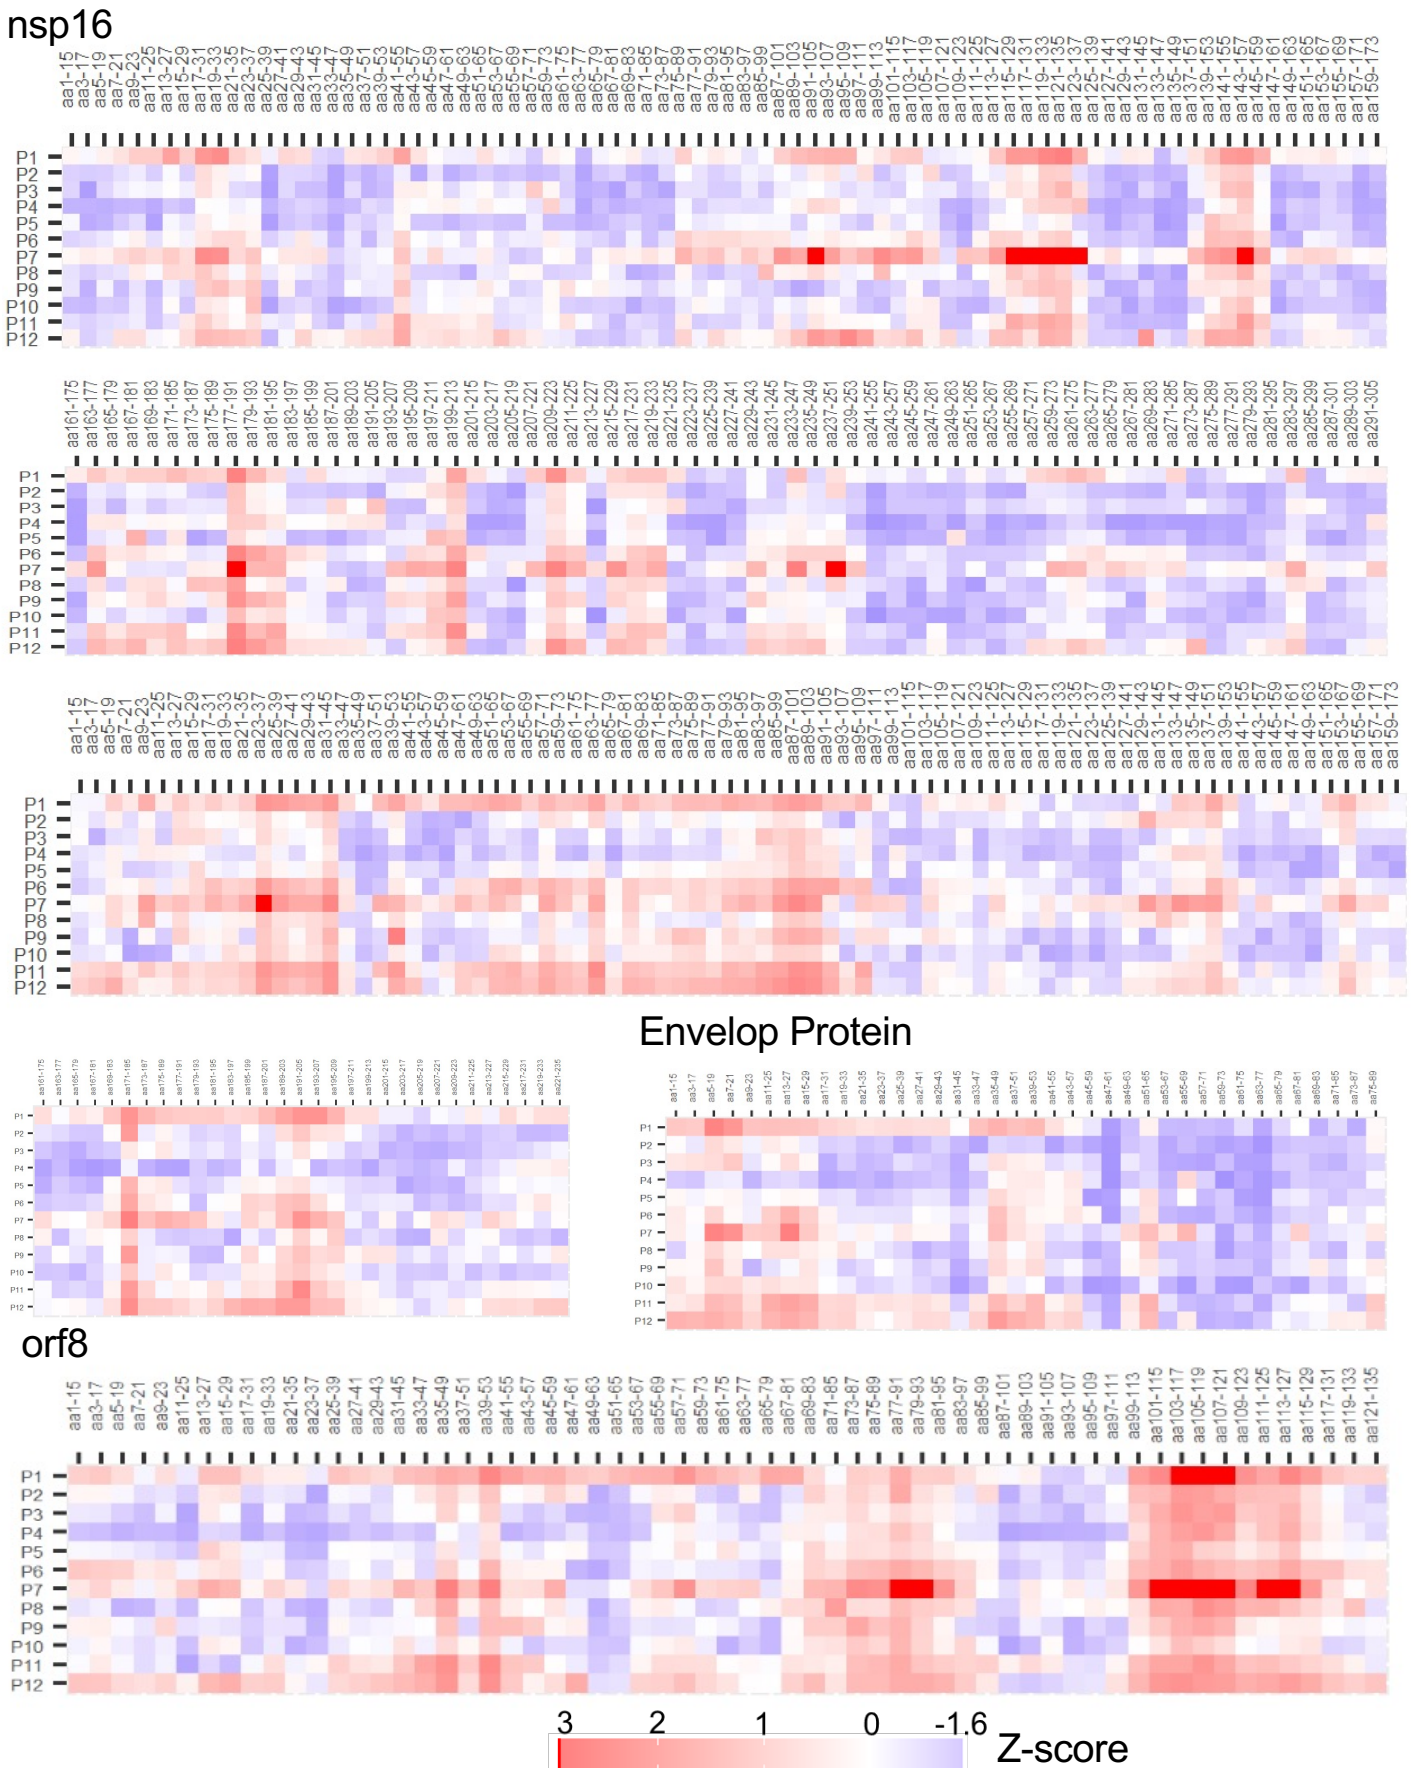



**Supplementary Figure S1i:** Heatmap showing IgA response for peptide against accessory proteins (orf3a, orf7a, orf6, orf10). The amino acid sequence of the corresponding protein is denoted as “aa1-15” and the COVID-19 patients included in the study are presented as p1-p12. Immunogenic response against the peptide was visualised using Z-score of fluorescence intensity. Peptides with a Z-score greater than 3 in at least one COVID-19 patients was defined as immunogenic.

orf3a

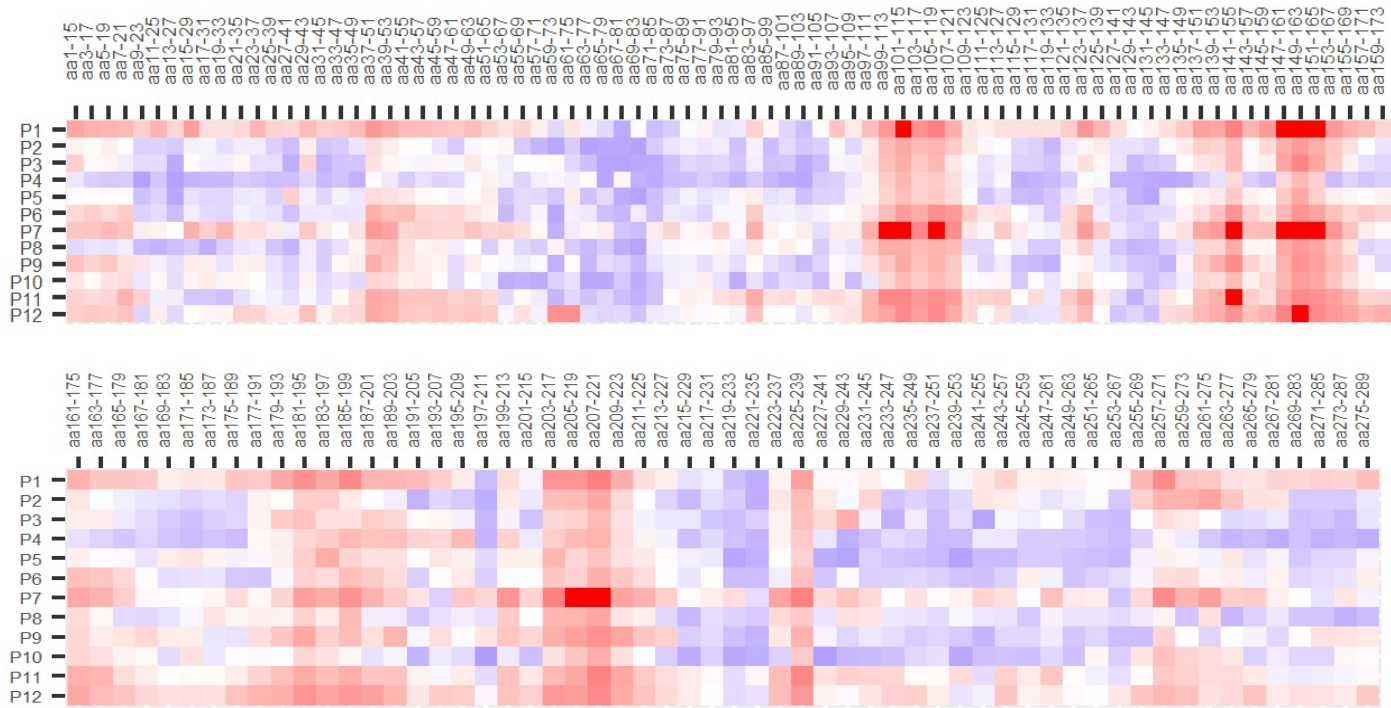



**Supplementary Figure S1j:** Heatmap showing IgA response for peptide against structural proteins (Spike). The amino acid sequence of the corresponding protein is denoted as “aa1-15” and the COVID-19 patients included in the study are presented as p1-p12. Immunogenic response against the peptide was visualised using Z-score of fluorescence intensity. Peptides with a Z-score greater than 3 in at least one COVID-19 patients was defined as immunogenic.

Spike Protein

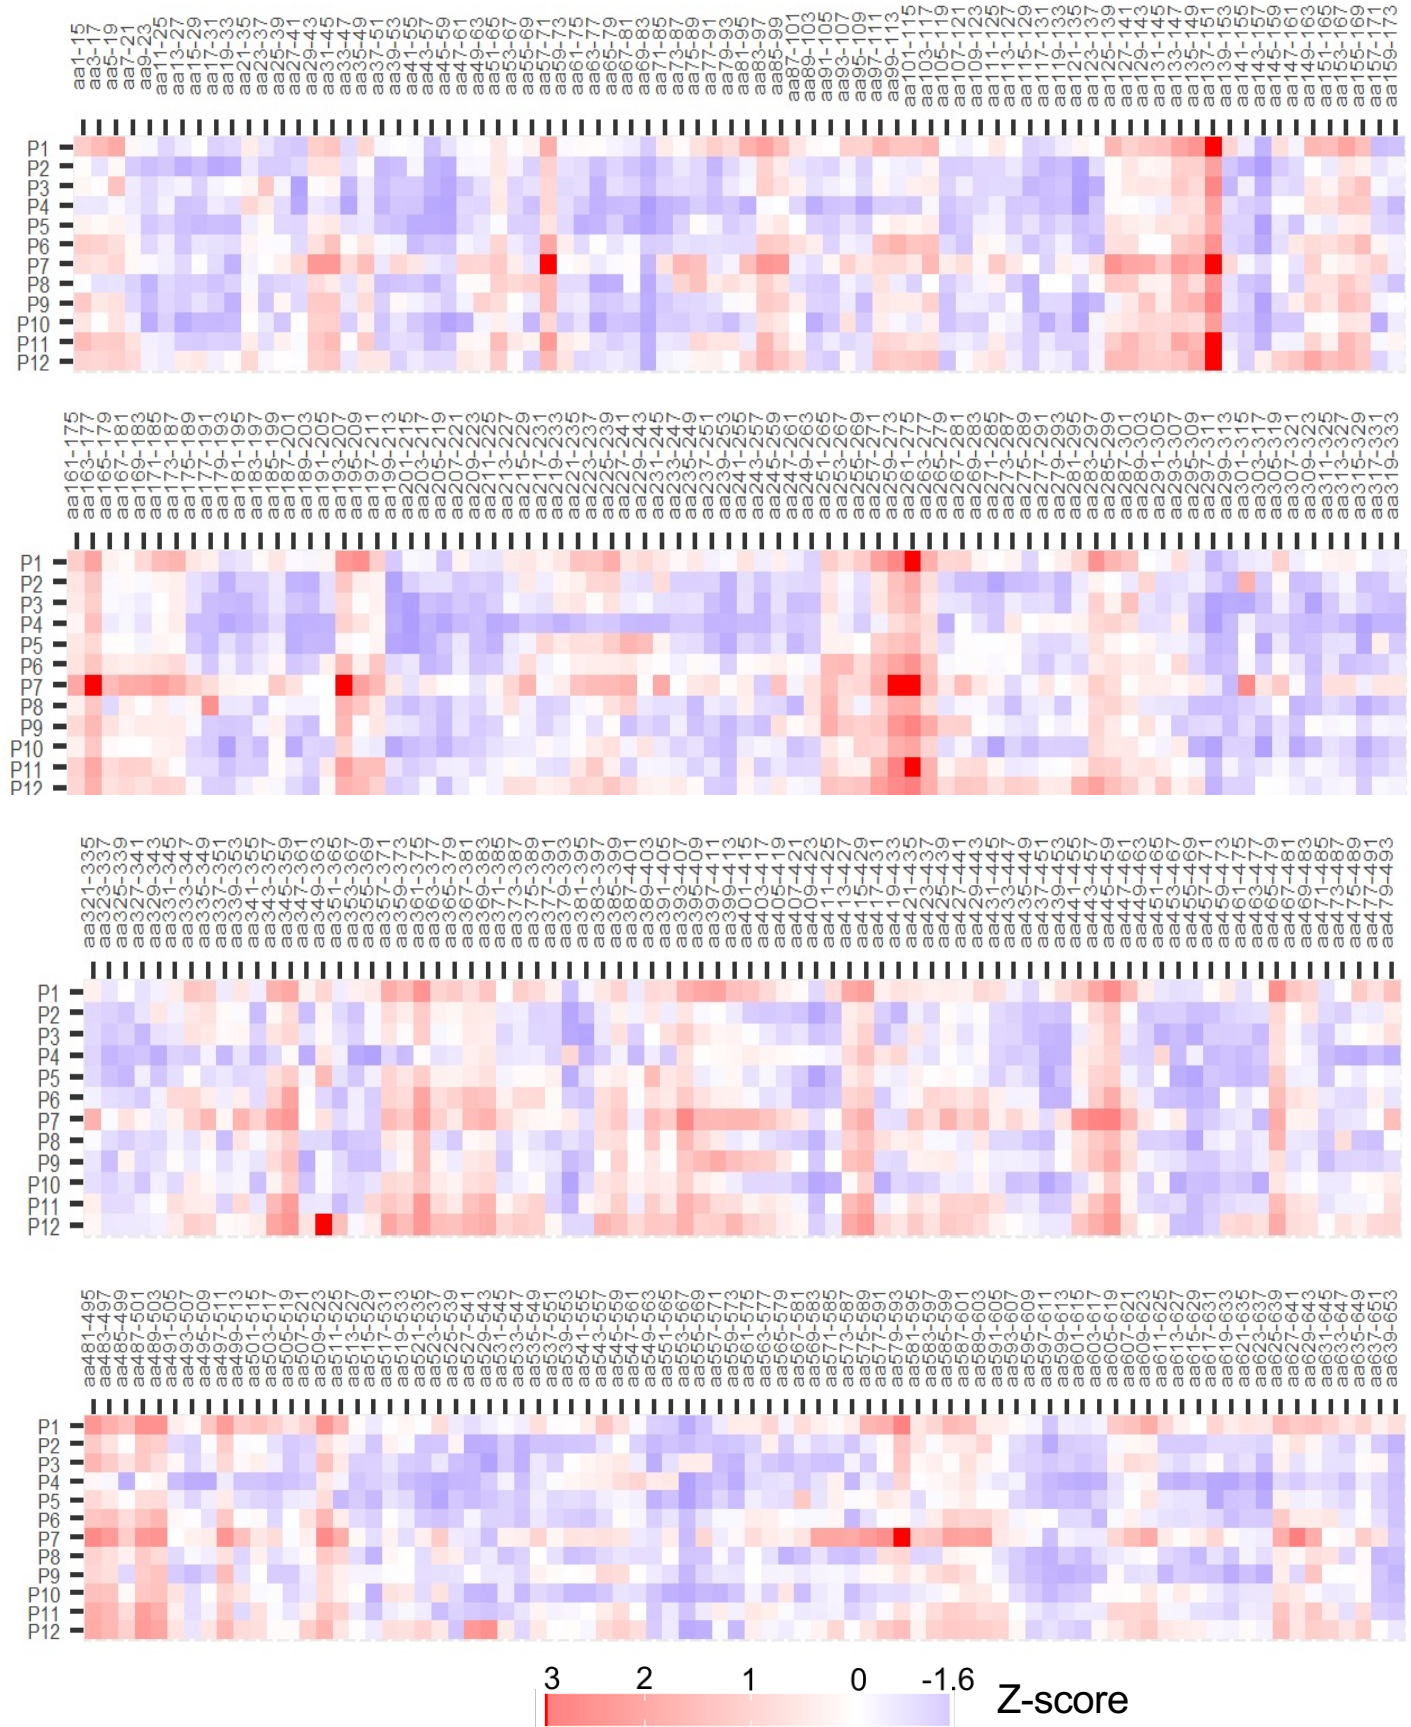



Supplementary Figure S1j contd...

Spike Protein

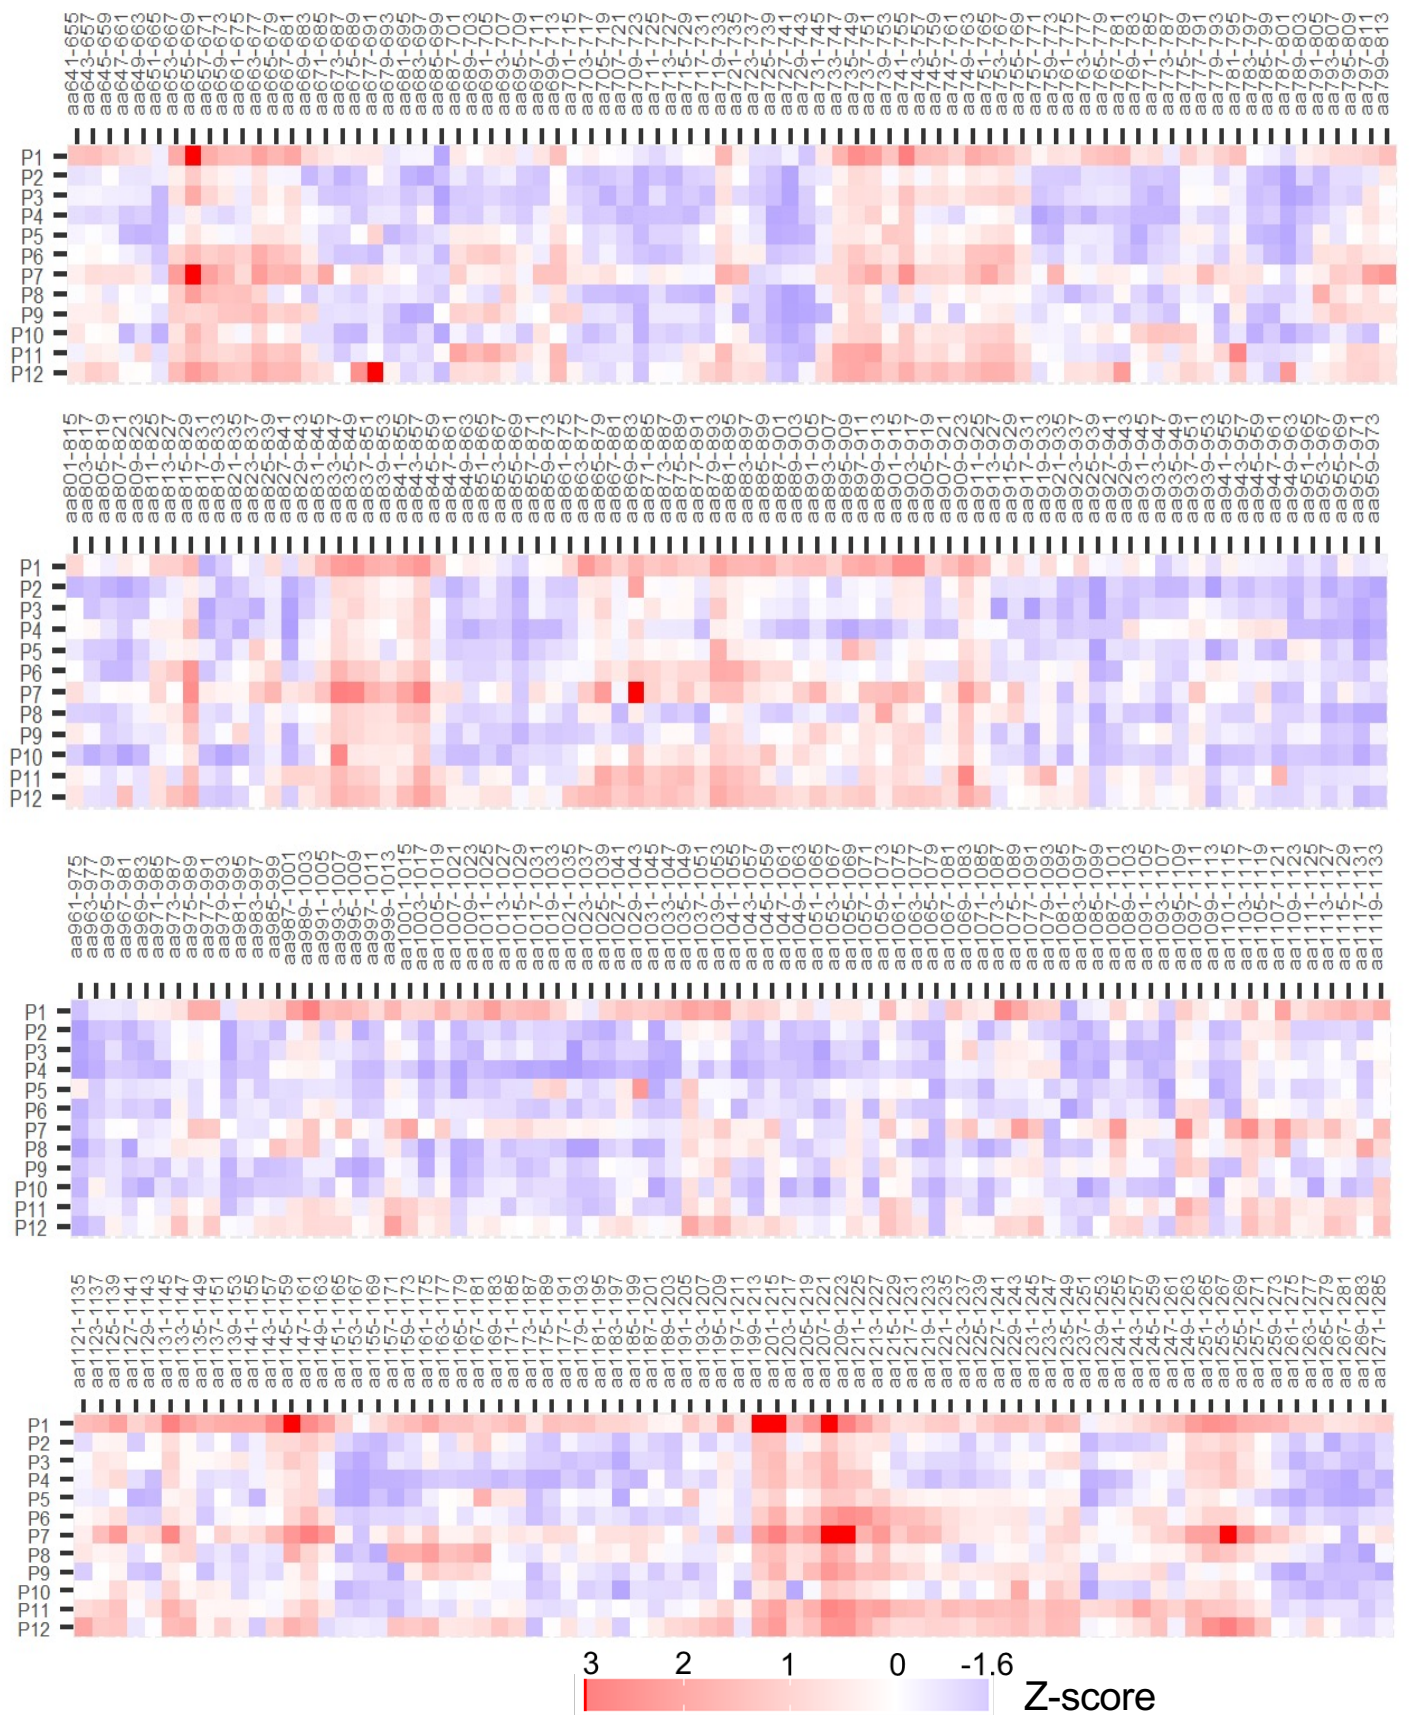



**Supplementary Figure S1k:** Heatmap showing IgA response for peptide against structural proteins (Nucleocapsid Phosphoprotein). The amino acid sequence of the corresponding protein is denoted as “aa1-15” and the COVID-19 patients included in the study are presented as p1-p12. Immunogenic response against the peptide was visualised using Z-score of fluorescence intensity. Peptides with a Z-score greater than 3 in at least one COVID-19 patients was defined as immunogenic.

Nucleocapsid Phosphoprotein

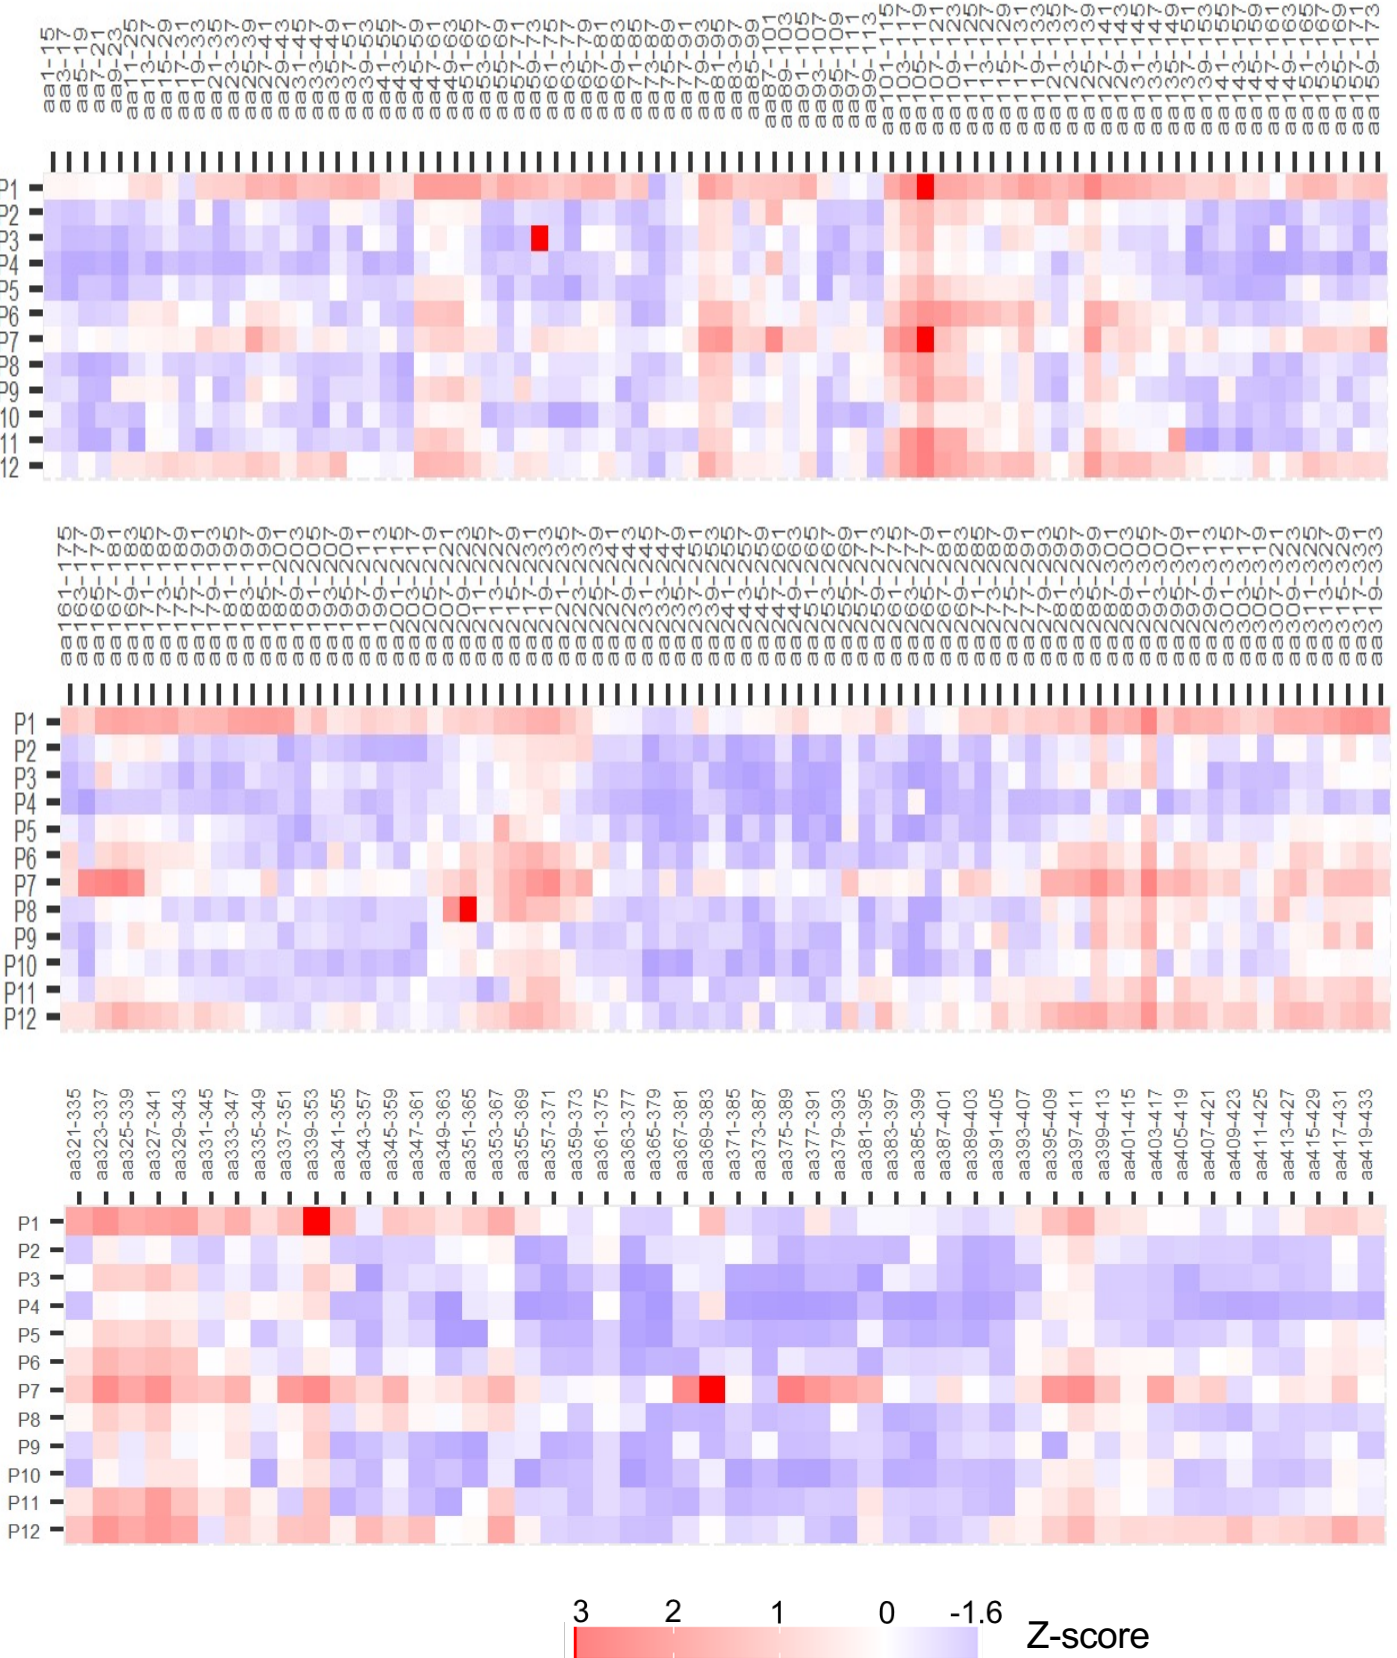



**Supplementary Figure S2a:** Heatmap showing IgG response for peptide against orf1ab non-structural protein (nsp1, nsp2). The amino acid sequence of the corresponding protein is denoted as “aa1-15” and the COVID-19 patients included in the study are presented as p1-p12. Immunogenic response against the peptide was visualised using Z-score of fluorescence intensity. Peptides with a Z-score greater than 3 in at least one COVID-19 patients was defined as immunogenic.

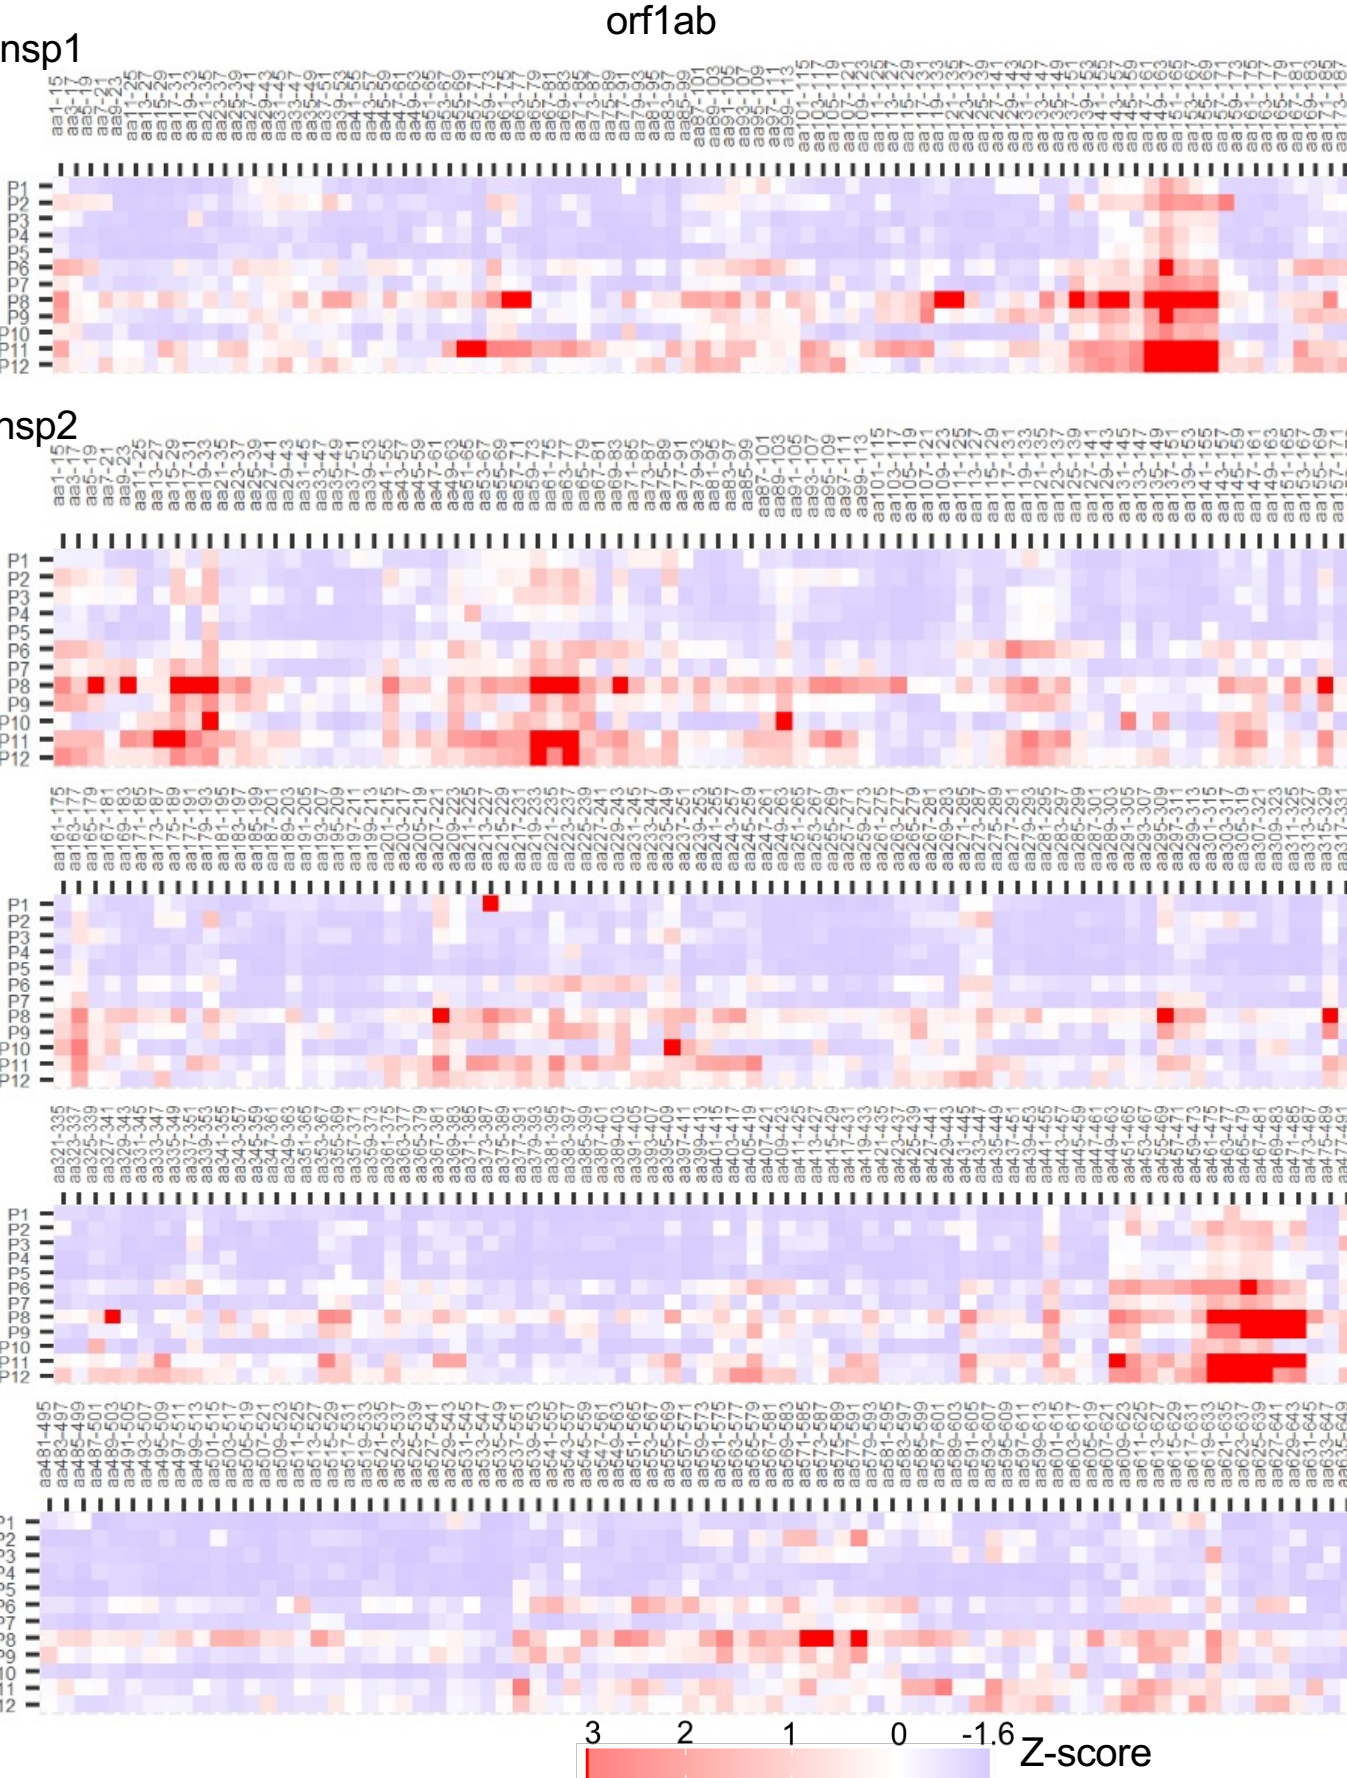



**Supplementary Figure S2b:** Heatmap showing IgG response for peptide against orf1ab non-structural protein (nsp3). The amino acid sequence of the corresponding protein is denoted as “aa1-15” and the COVID-19 patients included in the study are presented as p1-p12. Immunogenic response against the peptide was visualised using Z-score of fluorescence intensity. Peptides with a Z-score greater than 3 in at least one COVID-19 patients was defined as immunogenic.

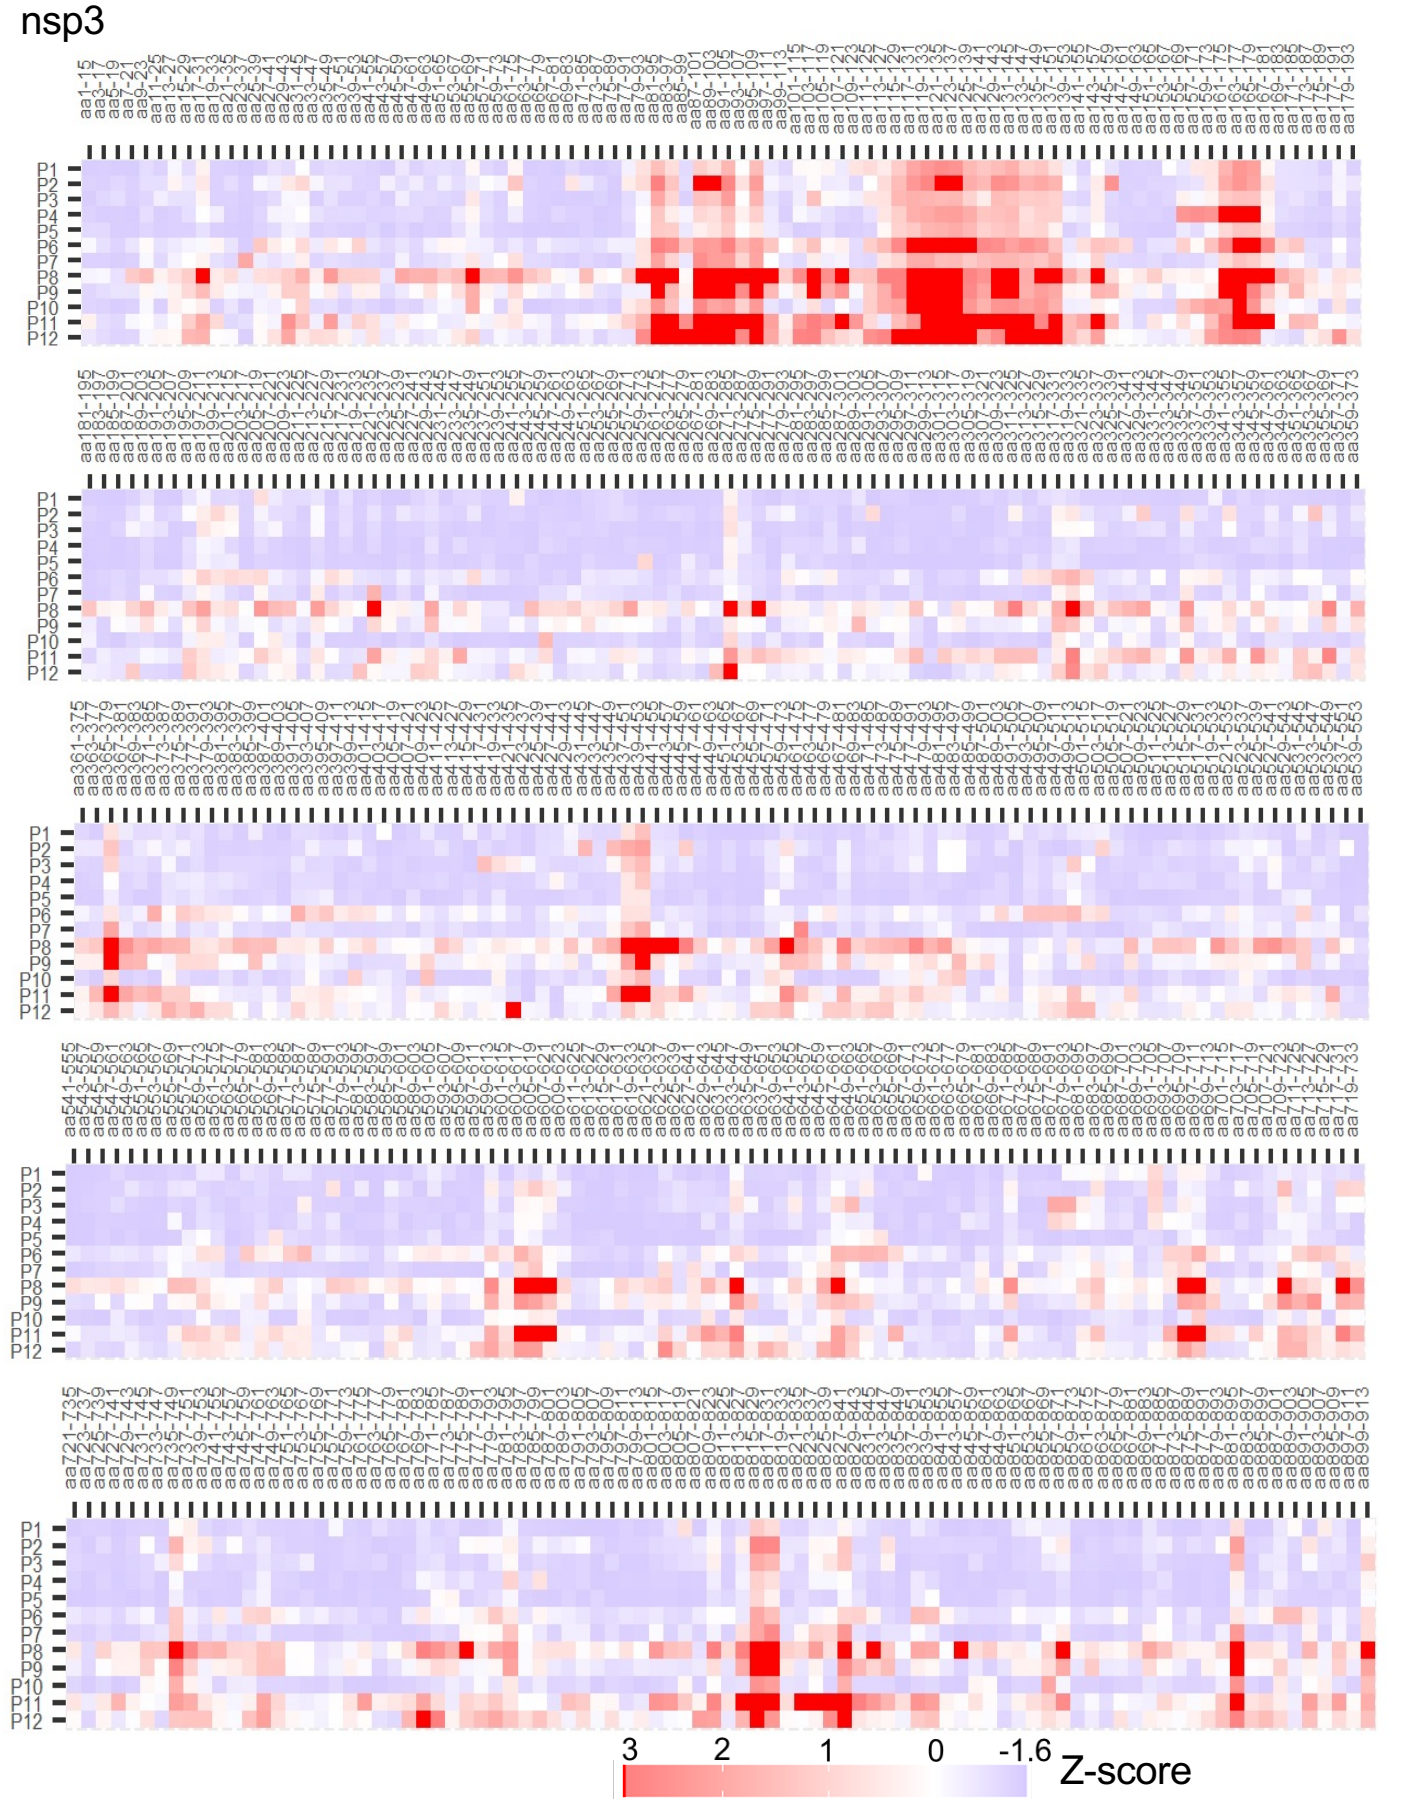



Supplementary Figure S2b contd...

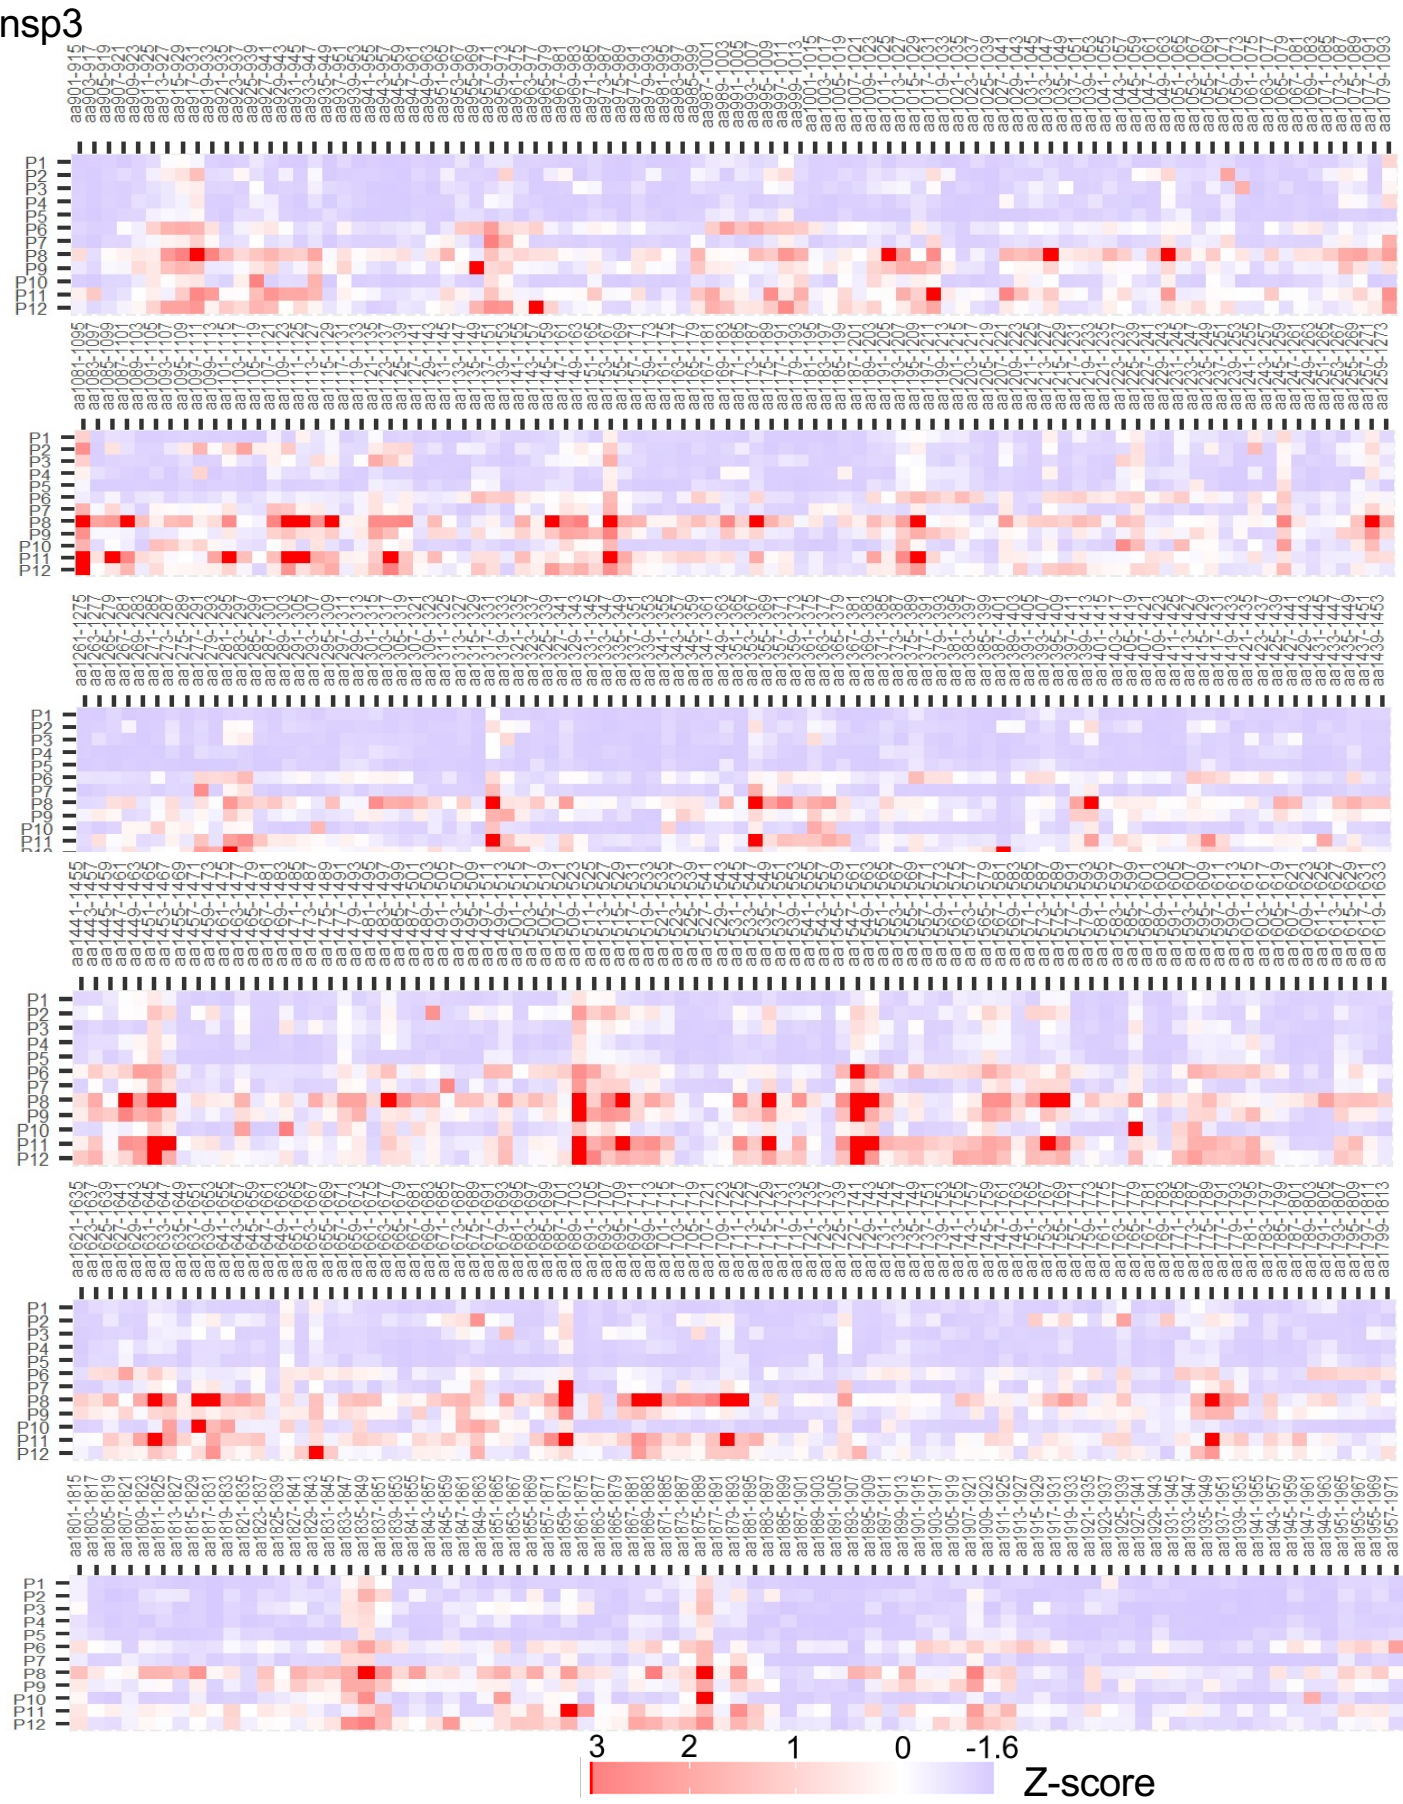



**Supplementary Figure S2c:** Heatmap showing IgG response for peptide against orf1ab non-structural protein (nsp4, nsp5). The amino acid sequence of the corresponding protein is denoted as “aa1-15” and the COVID-19 patients included in the study are presented as p1-p12. Immunogenic response against the peptide was visualised using Z-score of fluorescence intensity. Peptides with a Z-score greater than 3 in at least one COVID-19 patients was defined as immunogenic.

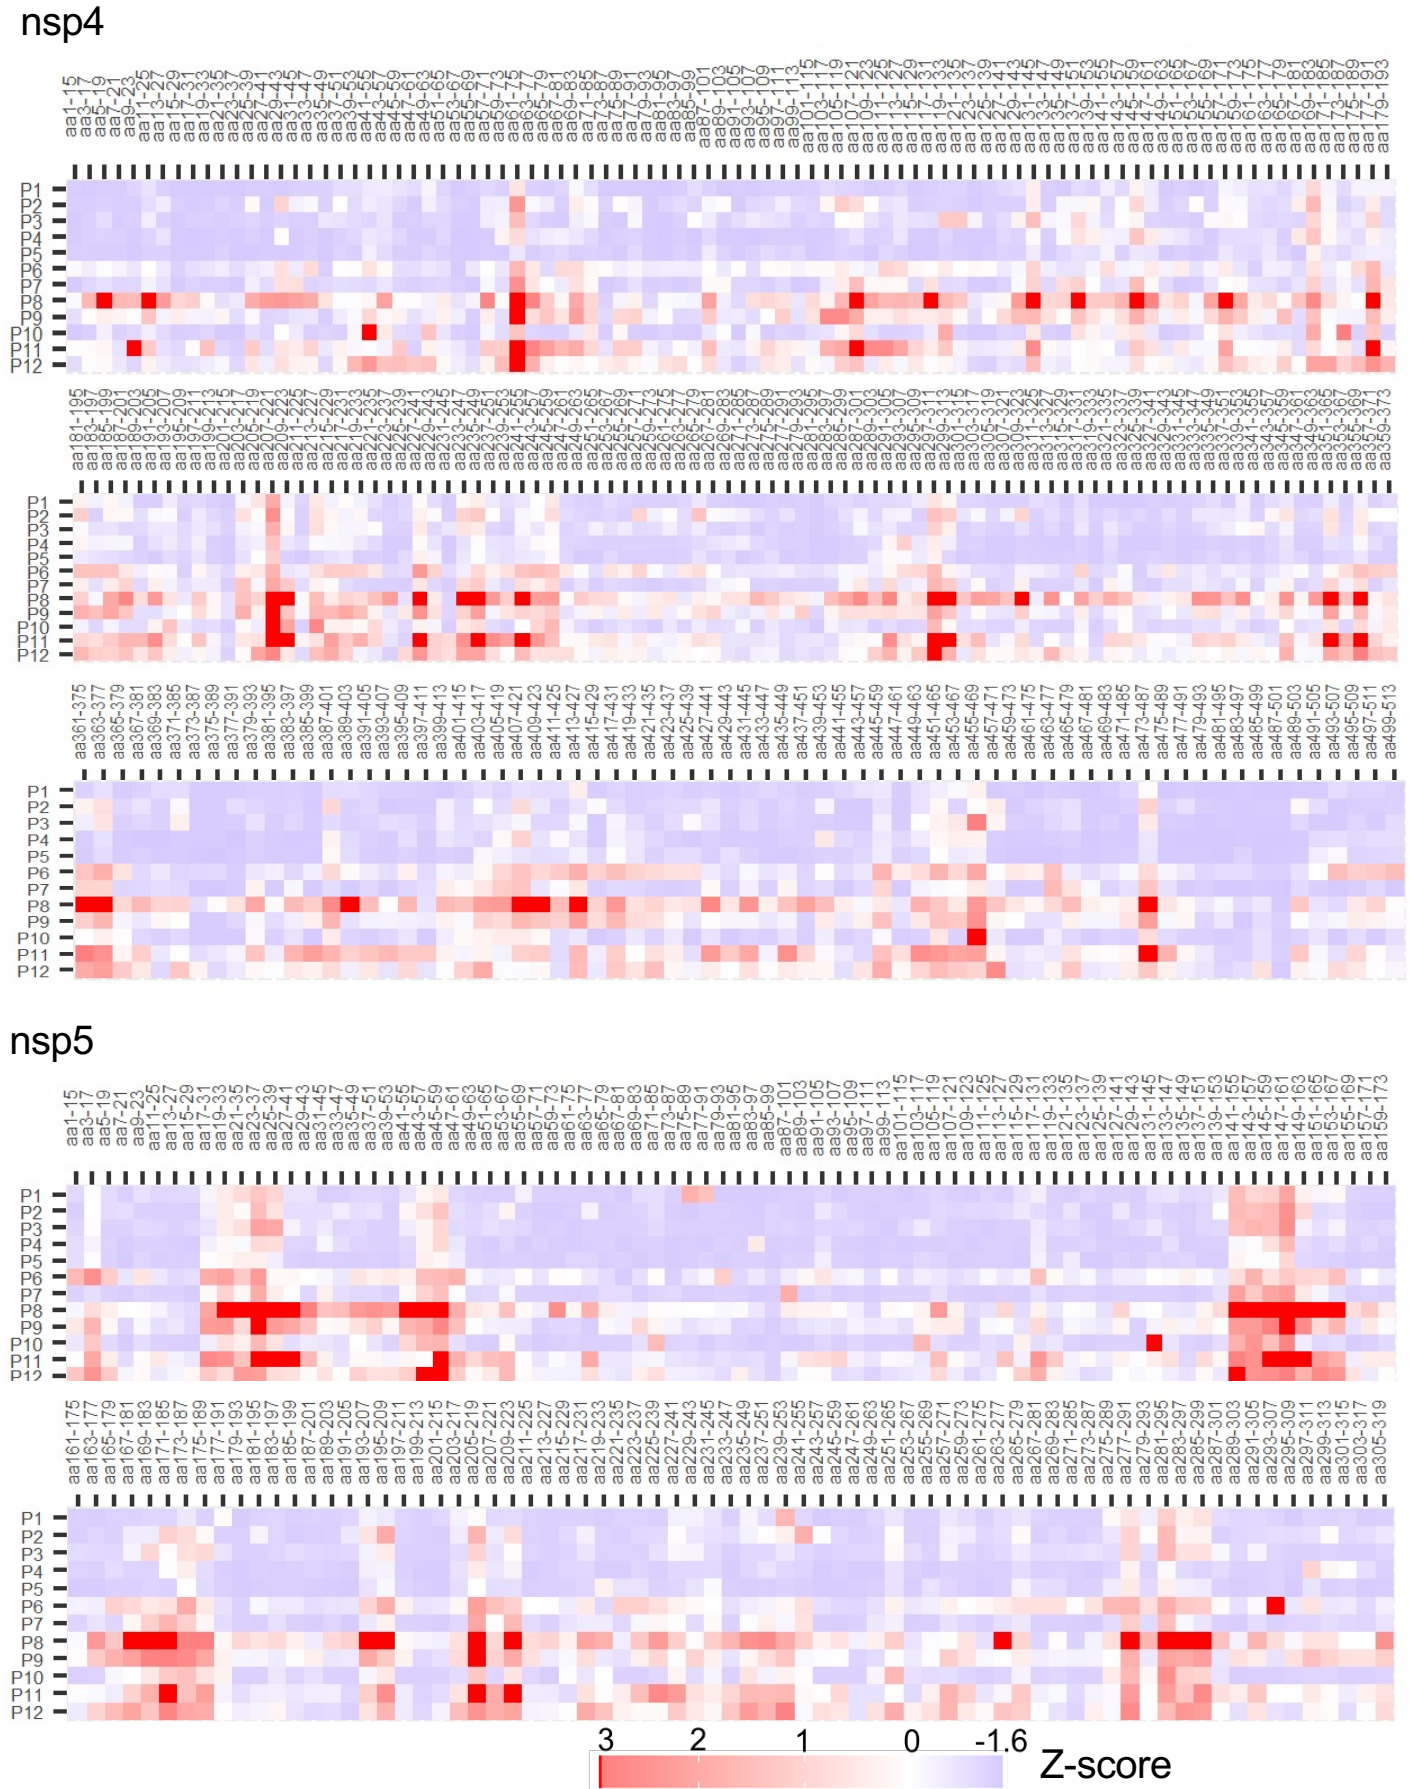



**Supplementary Figure S2d:** Heatmap showing IgG response for peptide against orf1ab non-structural protein (nsp6, nsp7, nsp8, nsp9). The amino acid sequence of the corresponding protein is denoted as “aa1-15” and the COVID-19 patients included in the study are presented as p1-p12. Immunogenic response against the peptide was visualised using Z-score of fluorescence intensity. Peptides with a Z-score greater than 3 in at least one COVID-19 patients was defined as immunogenic.

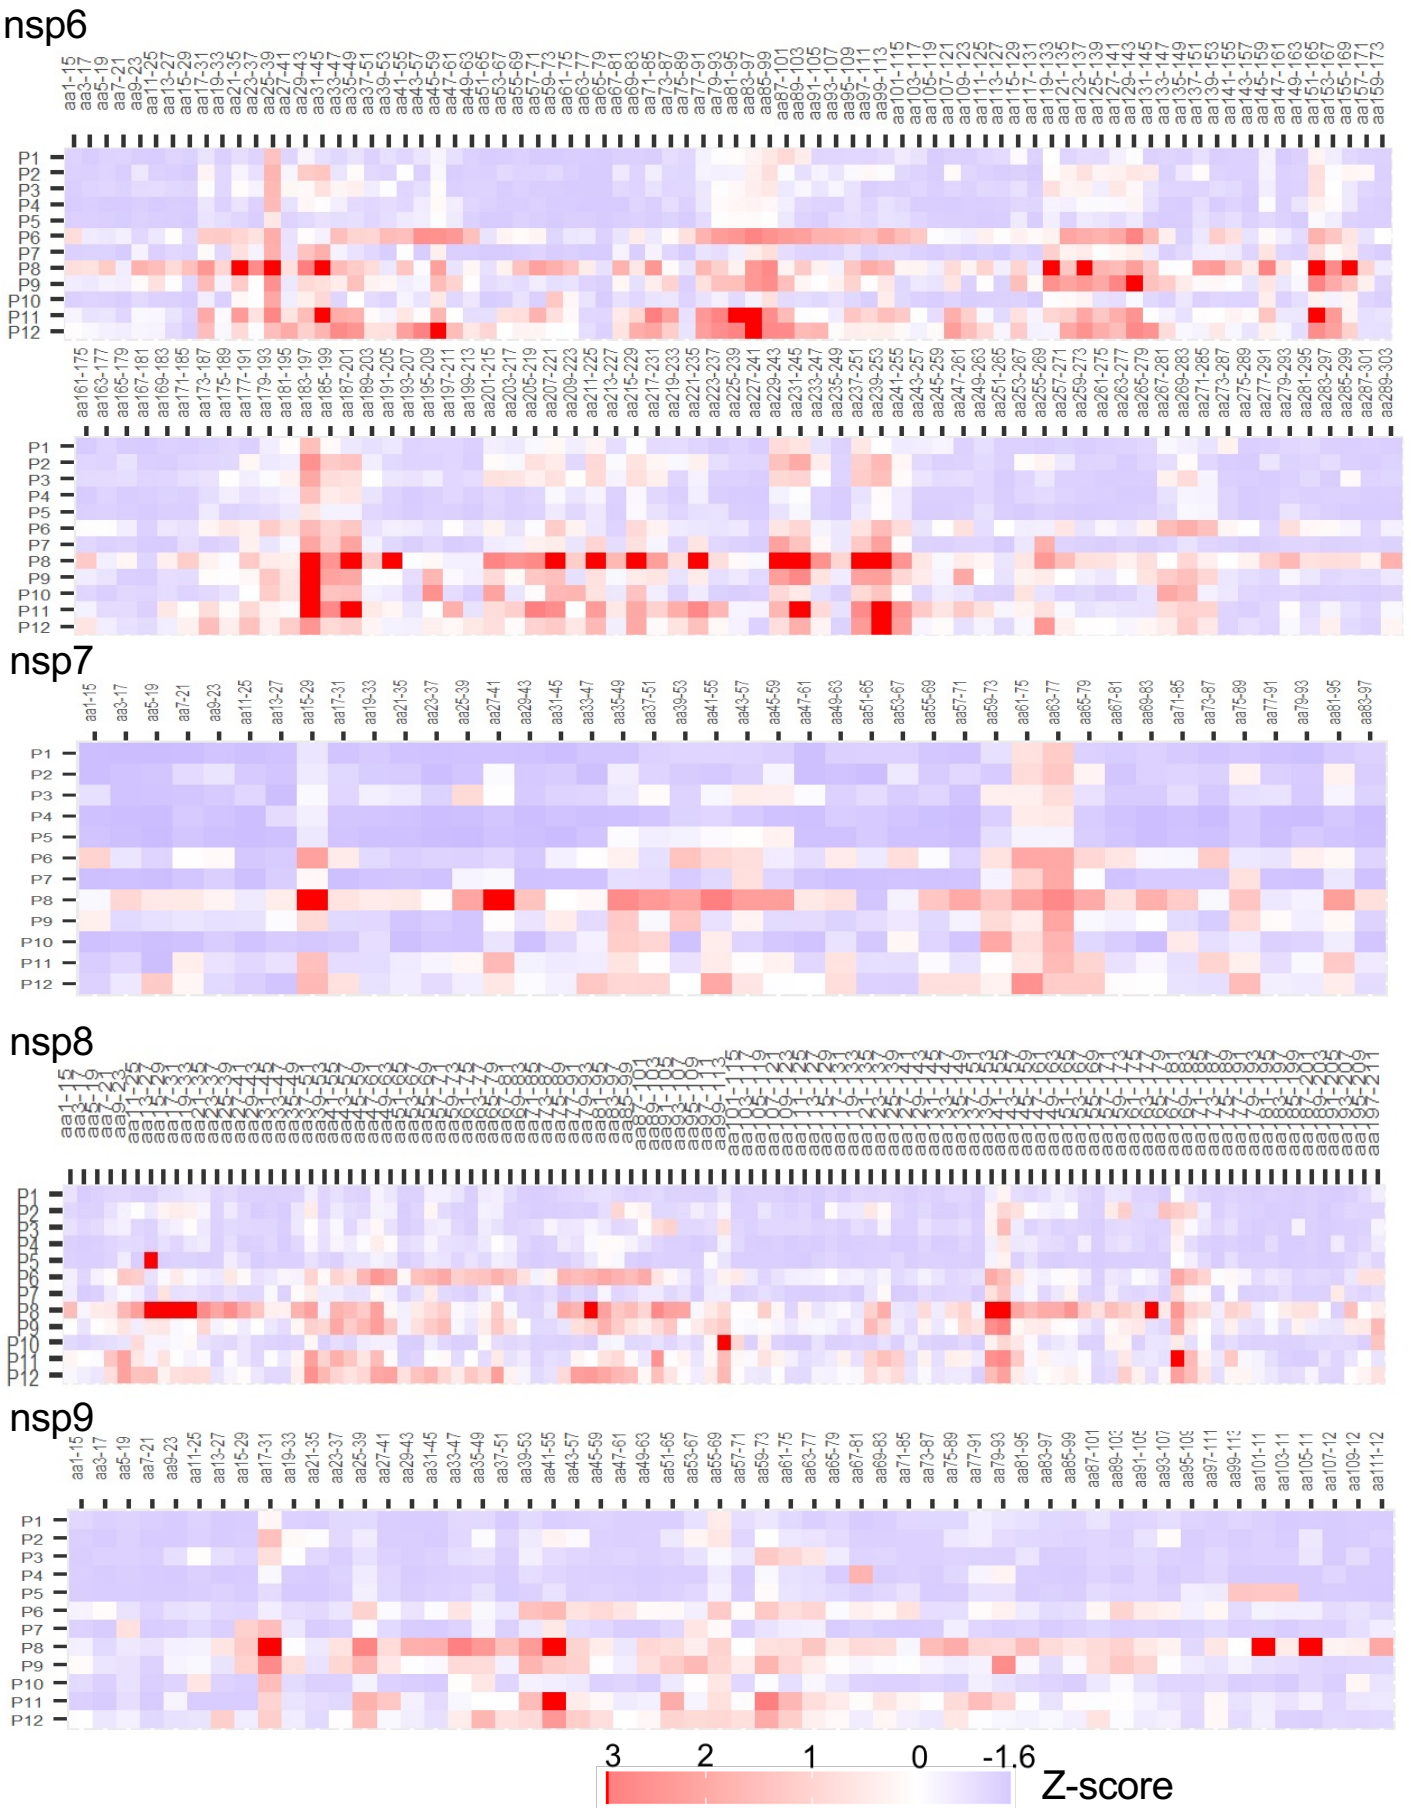



**Supplementary Figure S2e:** Heatmap showing IgG response for peptide against orf1ab non-structural protein (nsp10, nsp12). The amino acid sequence of the corresponding protein is denoted as “aa1-15” and the COVID-19 patients included in the study are presented as p1-p12. Immunogenic response against the peptide was visualised using Z-score of fluorescence intensity. Peptides with a Z-score greater than 3 in at least one COVID-19 patients was defined as immunogenic.

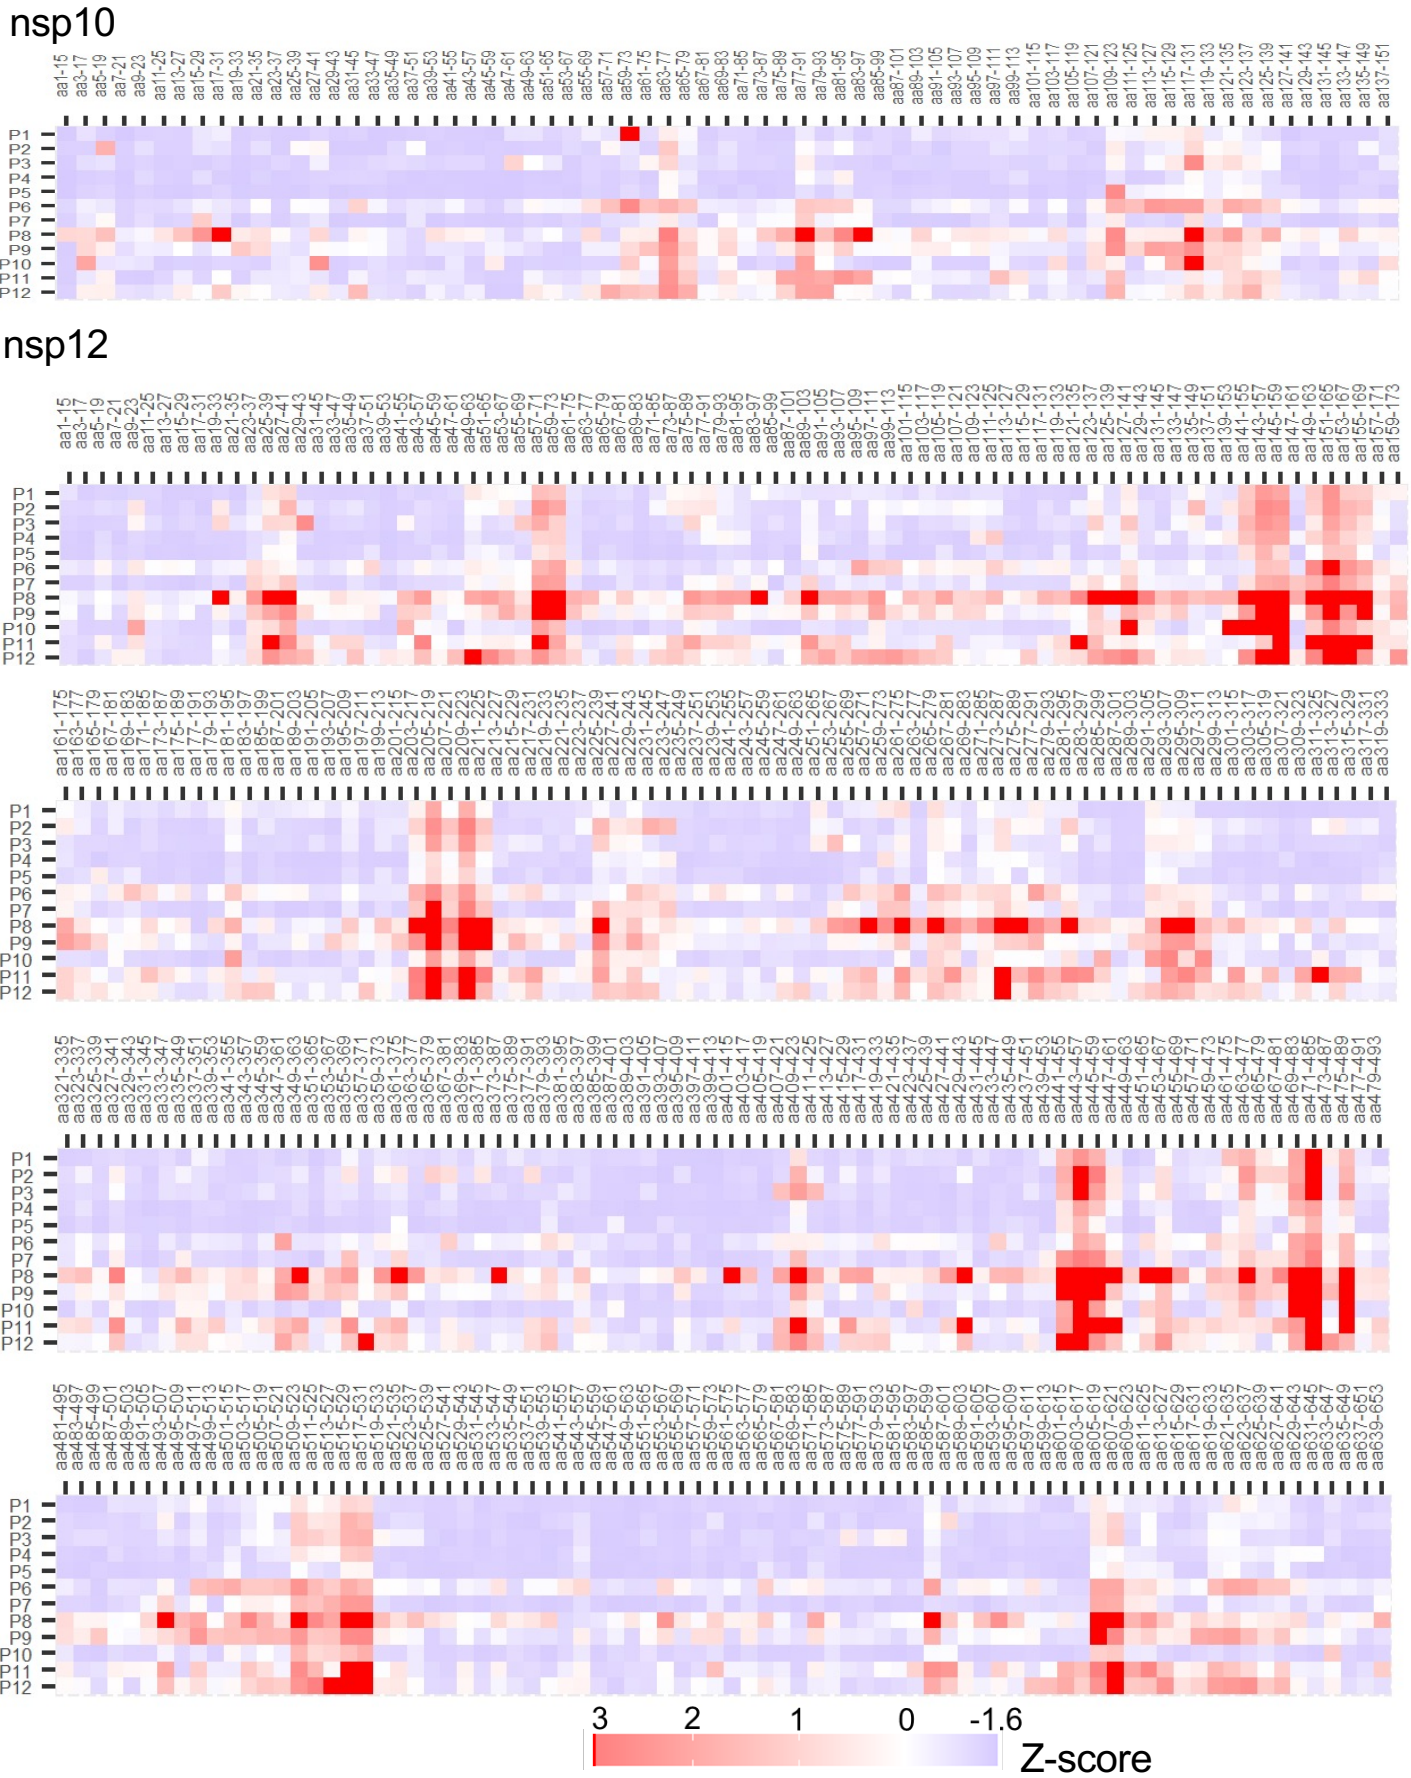



Supplementary Figure S2e contd...

nsp12

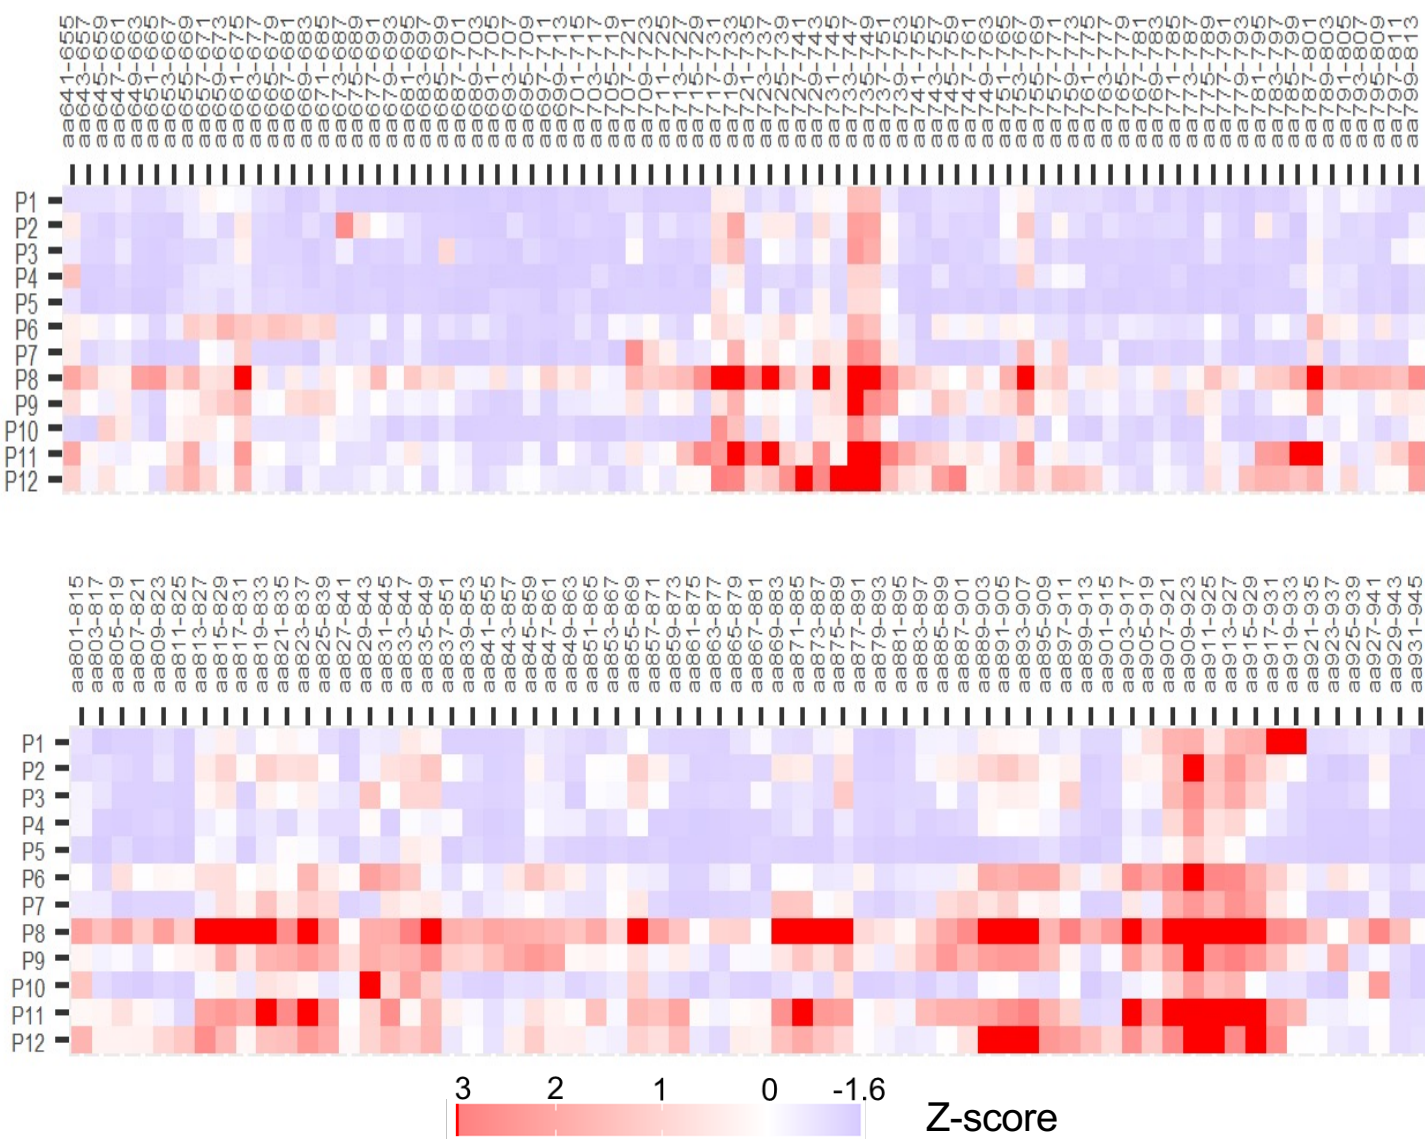



**Supplementary Figure S2f:** Heatmap showing IgG response for peptide against orf1ab non-structural protein (nsp13). The amino acid sequence of the corresponding protein is denoted as “aa1-15” and the COVID-19 patients included in the study are presented as p1-p12. Immunogenic response against the peptide was visualised using Z-score of fluorescence intensity. Peptides with a Z-score greater than 3 in at least one COVID-19 patients was defined as immunogenic.

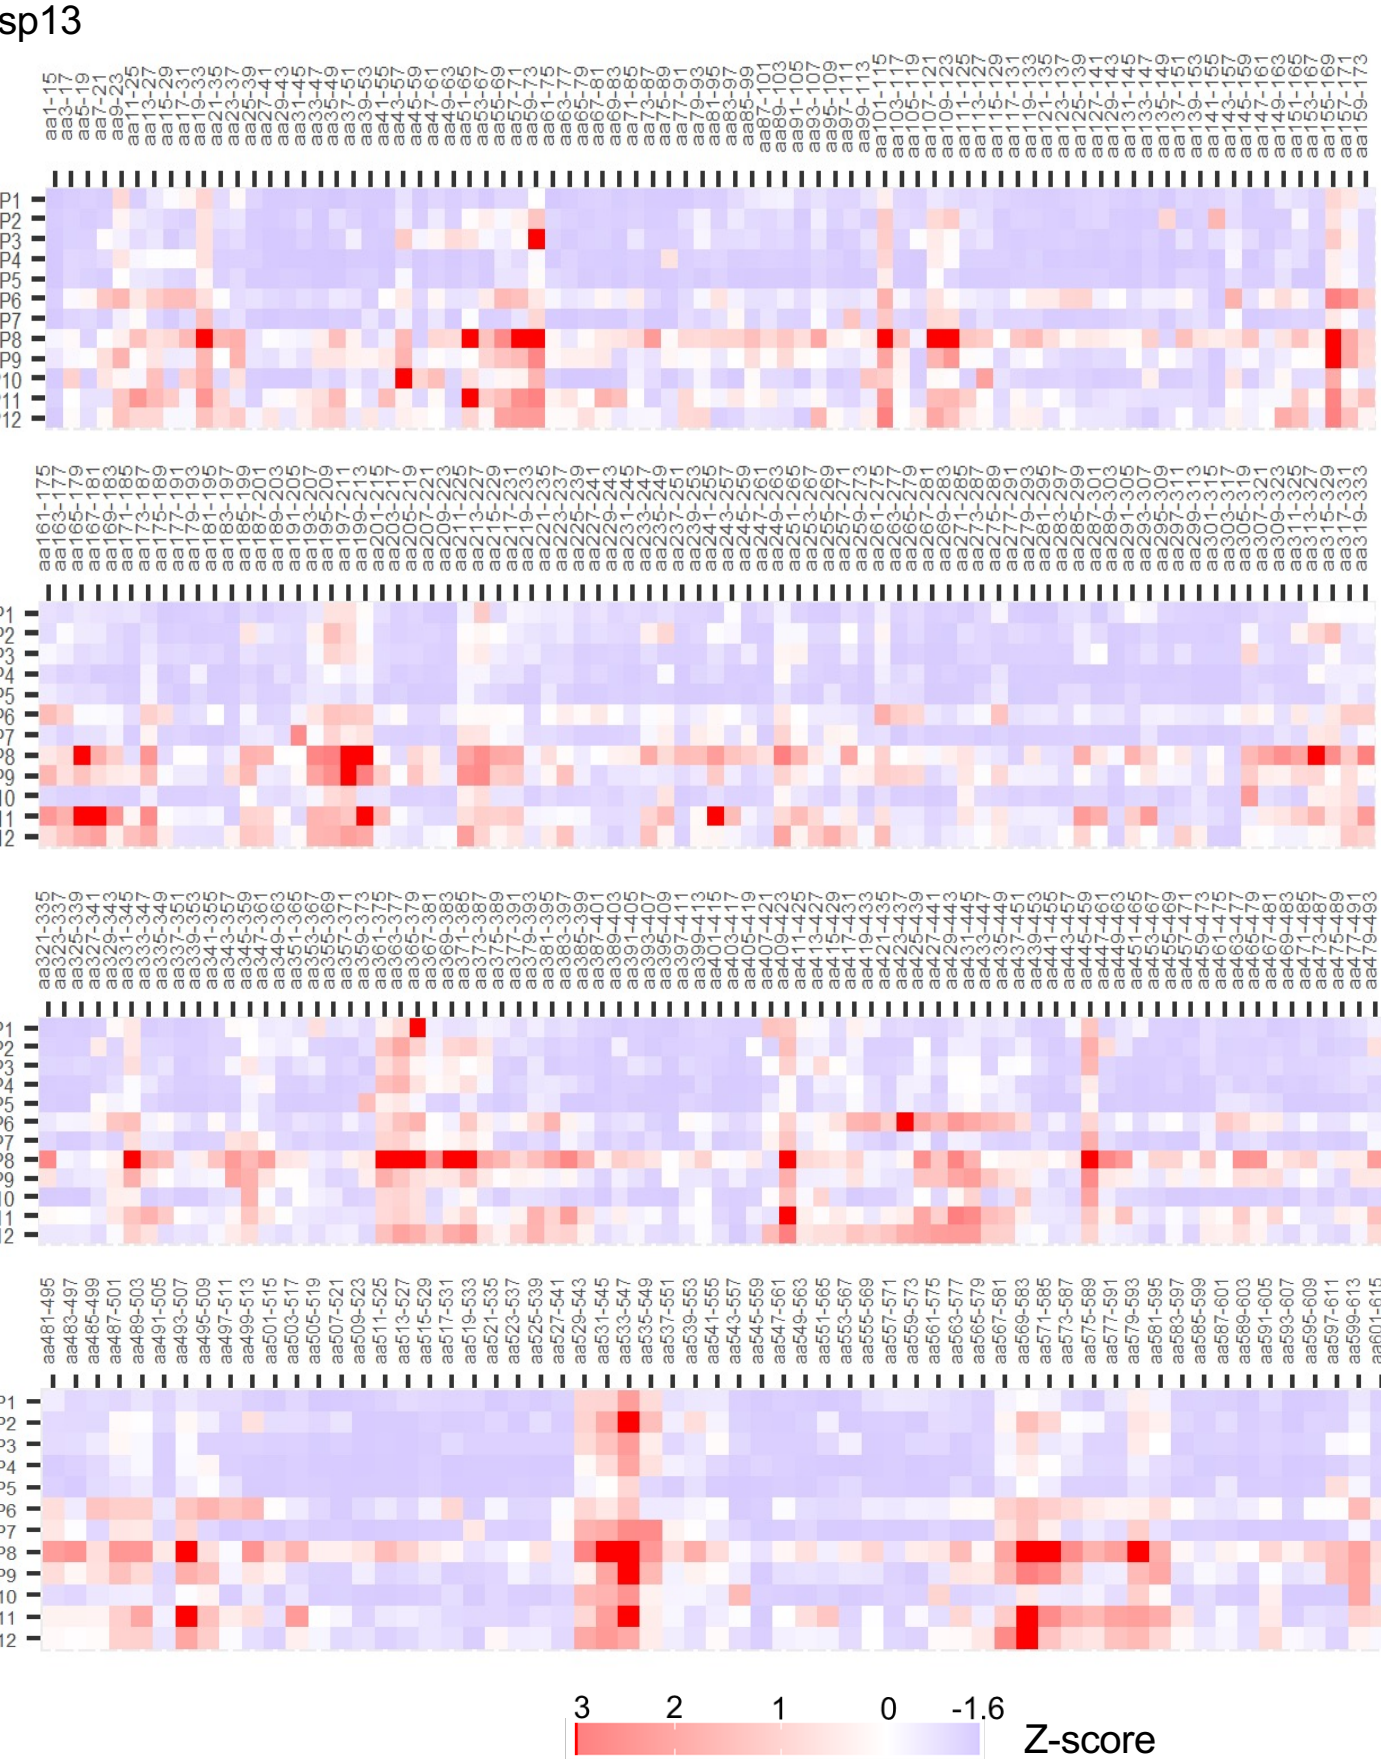



**Supplementary Figure S2g:** Heatmap showing IgG response for peptide against orf1ab non-structural protein (nsp14, nsp15). The amino acid sequence of the corresponding protein is denoted as “aa1-15” and the COVID-19 patients included in the study are presented as p1-p12. Immunogenic response against the peptide was visualised using Z-score of fluorescence intensity. Peptides with a Z-score greater than 3 in at least one COVID-19 patients was defined as immunogenic.

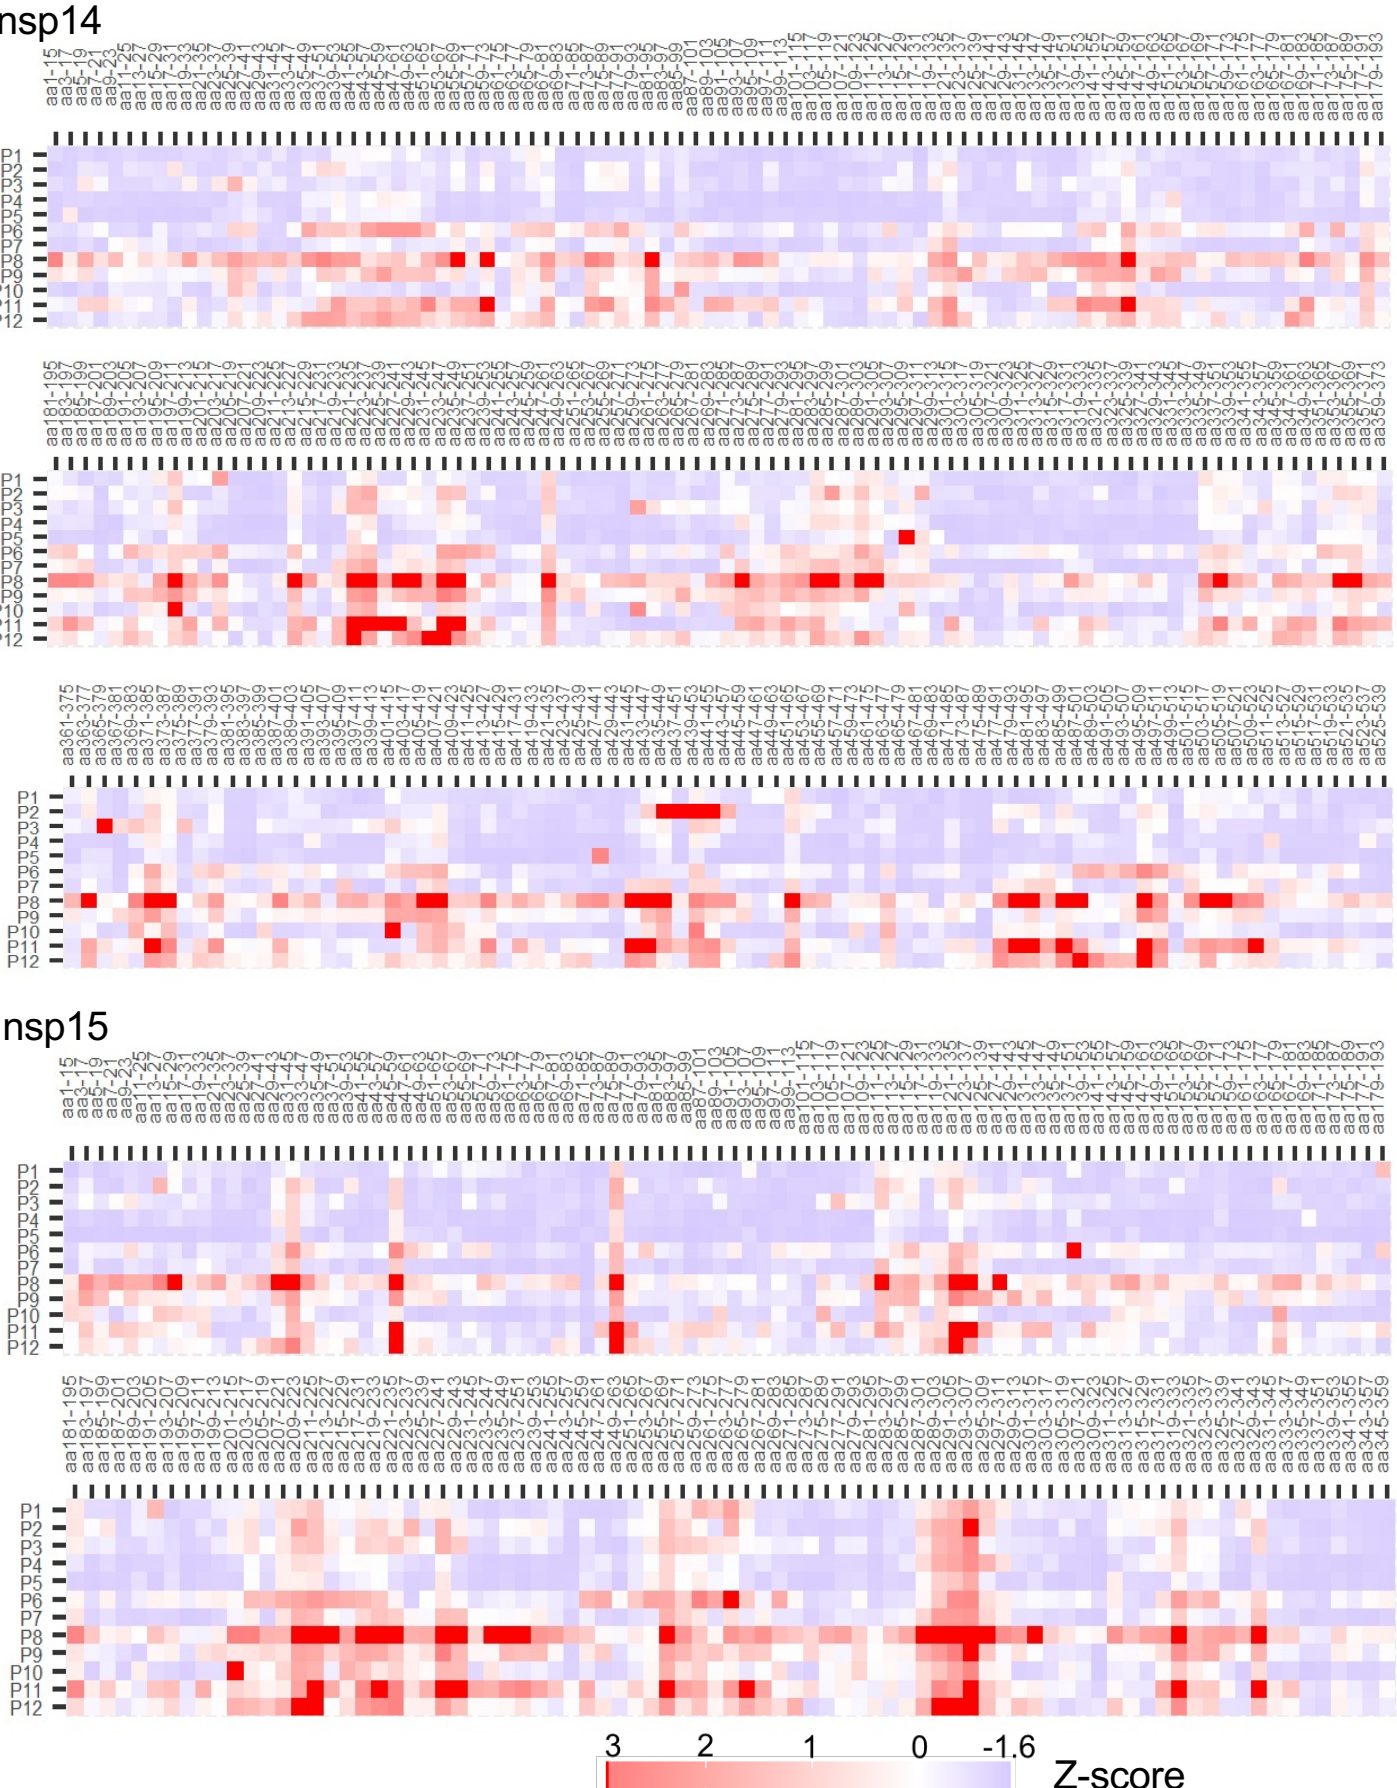



**Supplementary Figure S2h:** Heatmap showing IgG response for peptide against orf1ab non-structural, structural and accessory proteins (nsp16, membrane, envelop and orf8). The amino acid sequence of the corresponding protein is denoted as “aa1-15” and the COVID-19 patients included in the study are presented as p1-p12. Immunogenic response against the peptide was visualised using Z-score of fluorescence intensity. Peptides with a Z-score greater than 3 in at least one COVID-19 patients was defined as immunogenic.

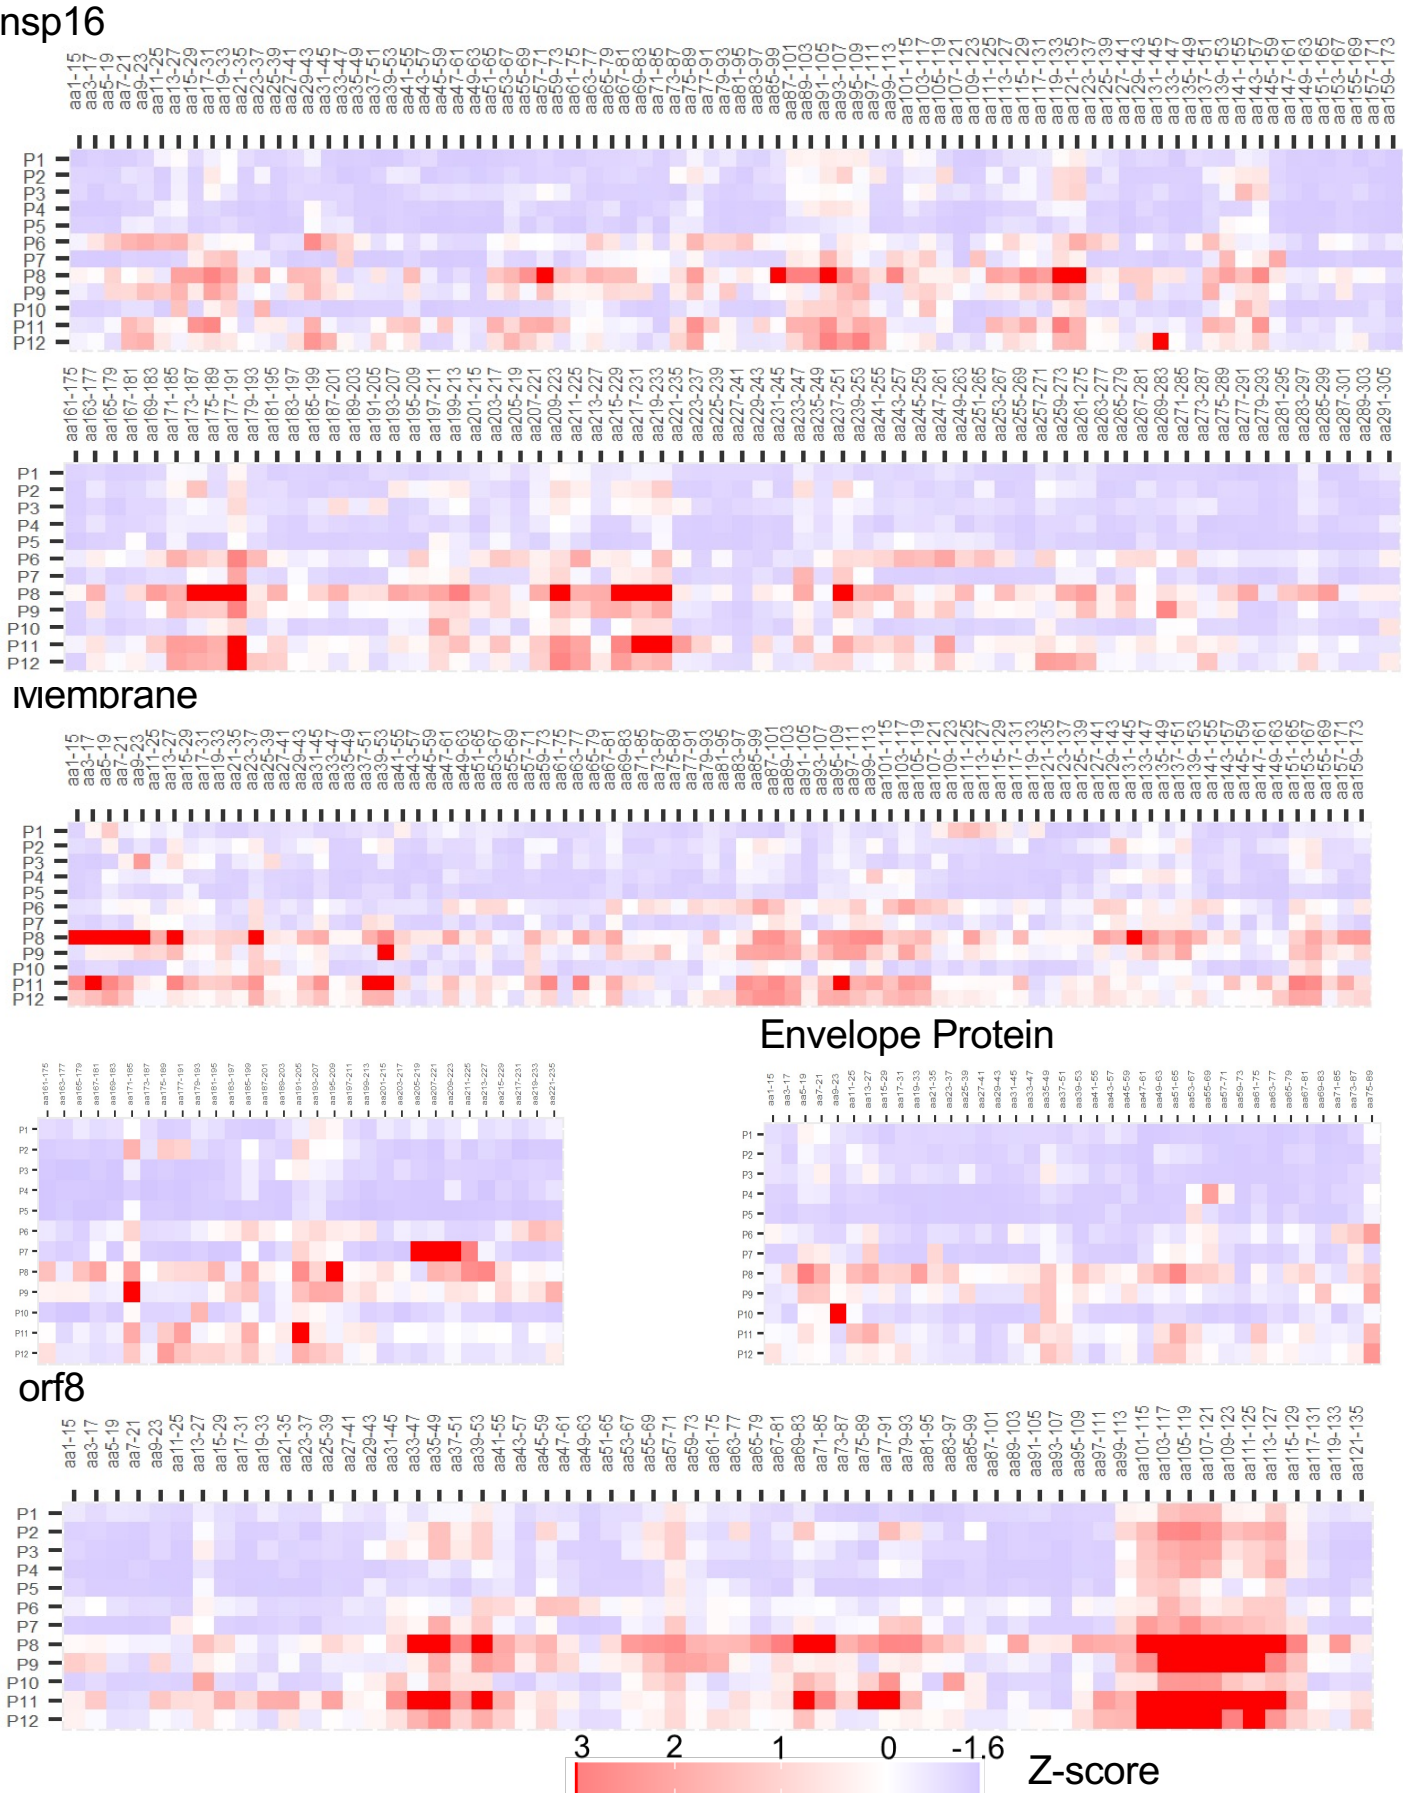



**Supplementary Figure S2i:** Heatmap showing IgG response for peptide against accessory proteins (orf3a, orf7a, orf6, orf10). The amino acid sequence of the corresponding protein is denoted as “aa1-15” and the COVID-19 patients included in the study are presented as p1-p12. Immunogenic response against the peptide was visualised using Z-score of fluorescence intensity. Peptides with a Z-score greater than 3 in at least one COVID-19 patients was defined as immunogenic.

orf3a

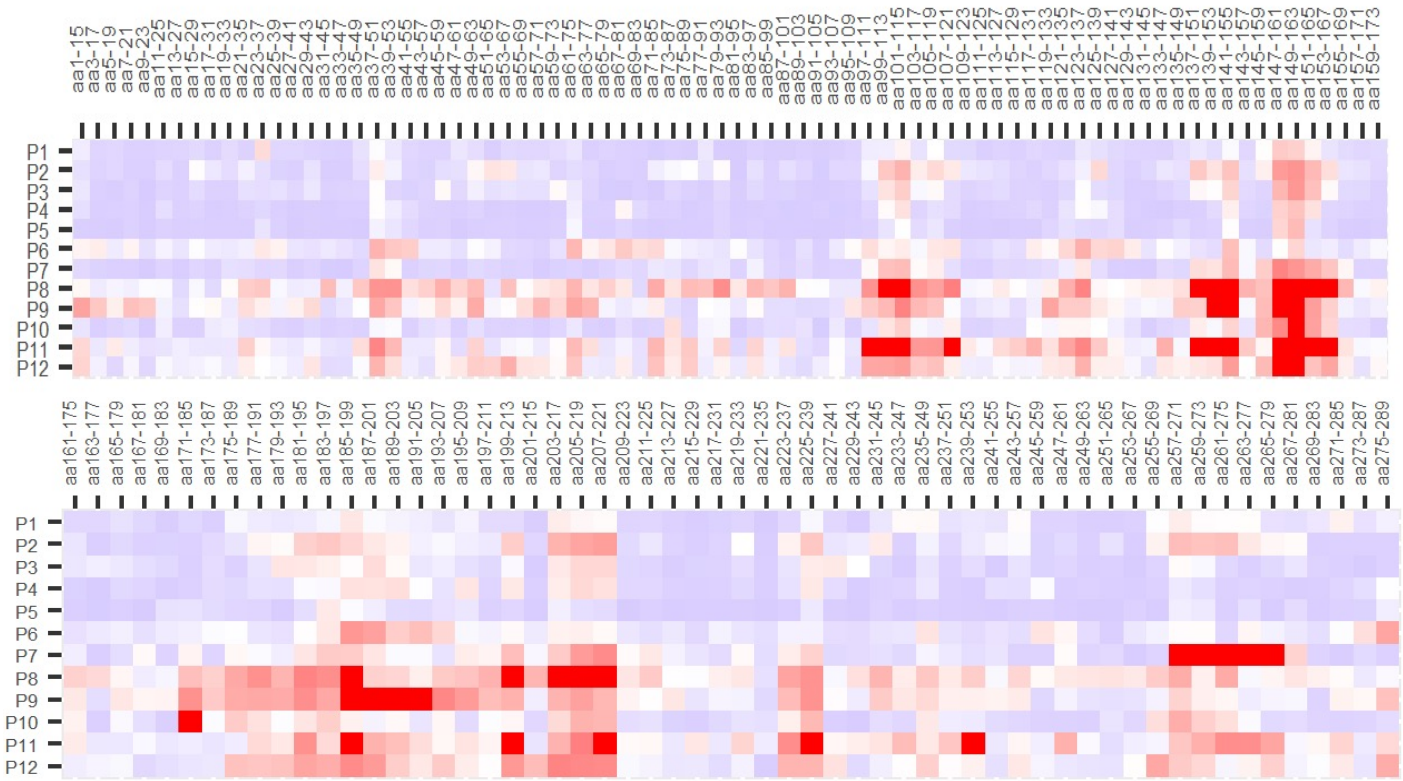

orf7a

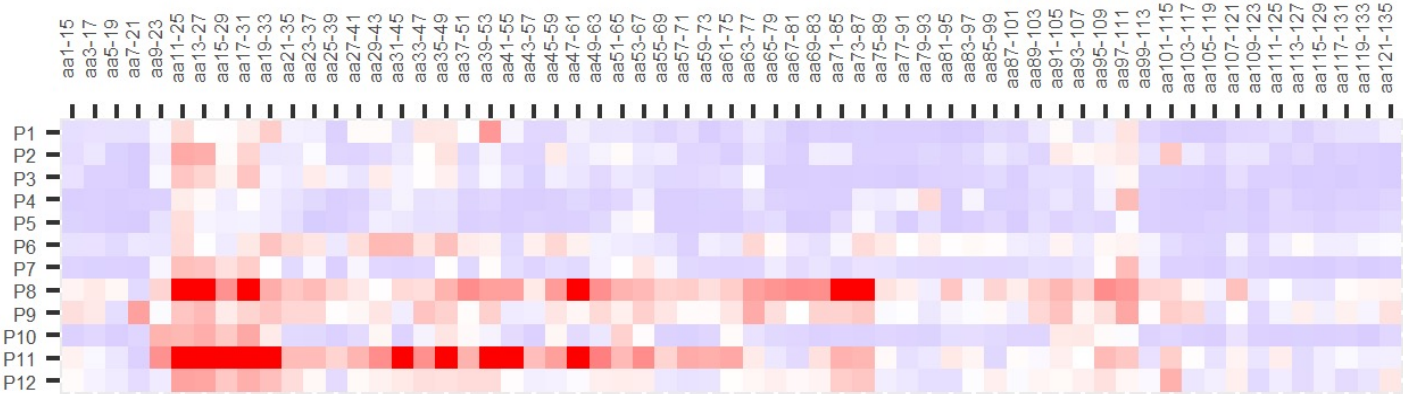

orf6

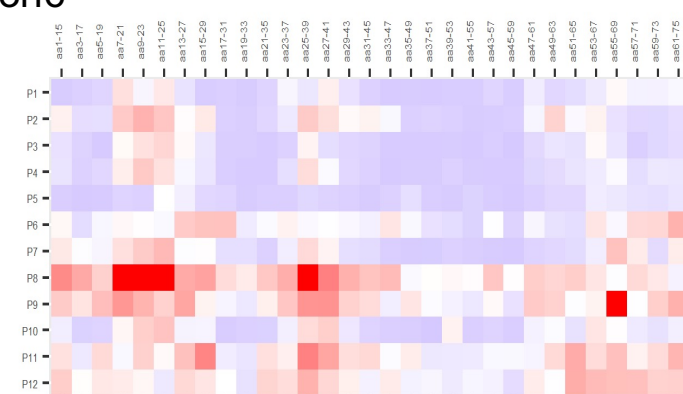

orf10

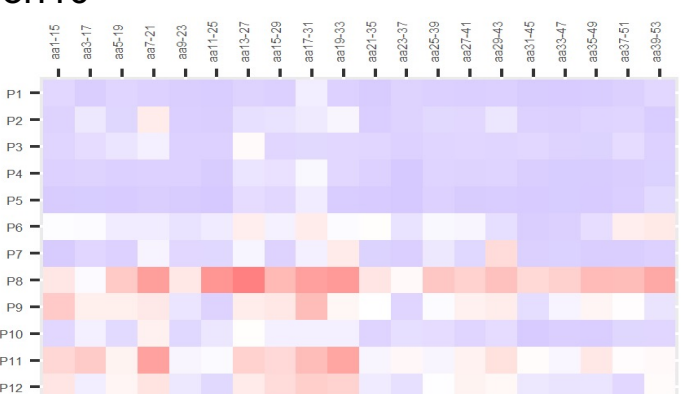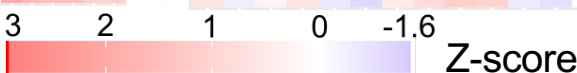



**Supplementary Figure S2j:** Heatmap showing IgG response for peptide against structural proteins (Spike). The amino acid sequence of the corresponding protein is denoted as “aa1-15” and the COVID-19 patients included in the study are presented as p1-p12. Immunogenic response against the peptide was visualised using Z-score of fluorescence intensity. Peptides with a Z-score greater than 3 in at least one COVID-19 patients was defined as immunogenic.

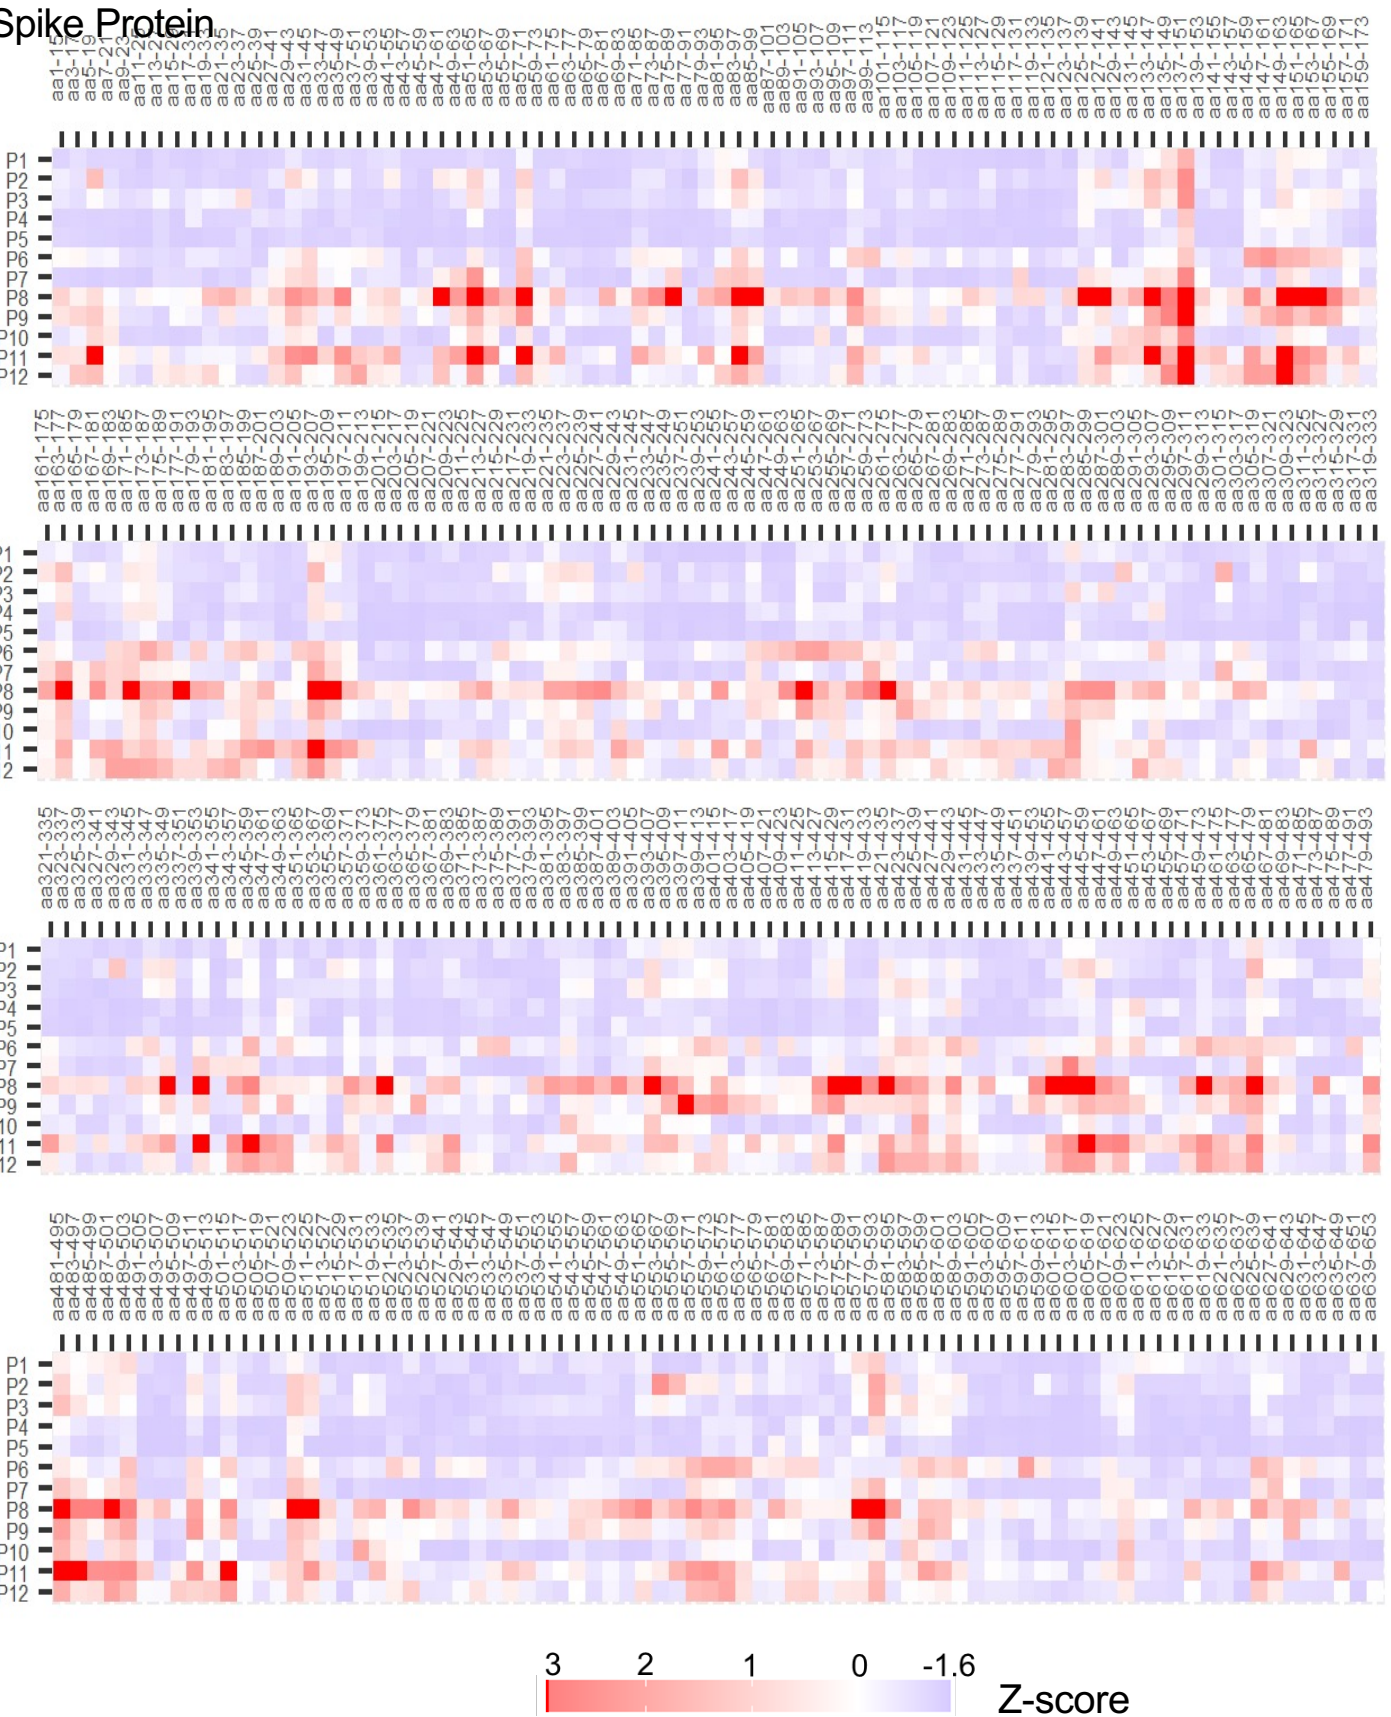



Supplementary Figure S2j contd...

Spike Protein

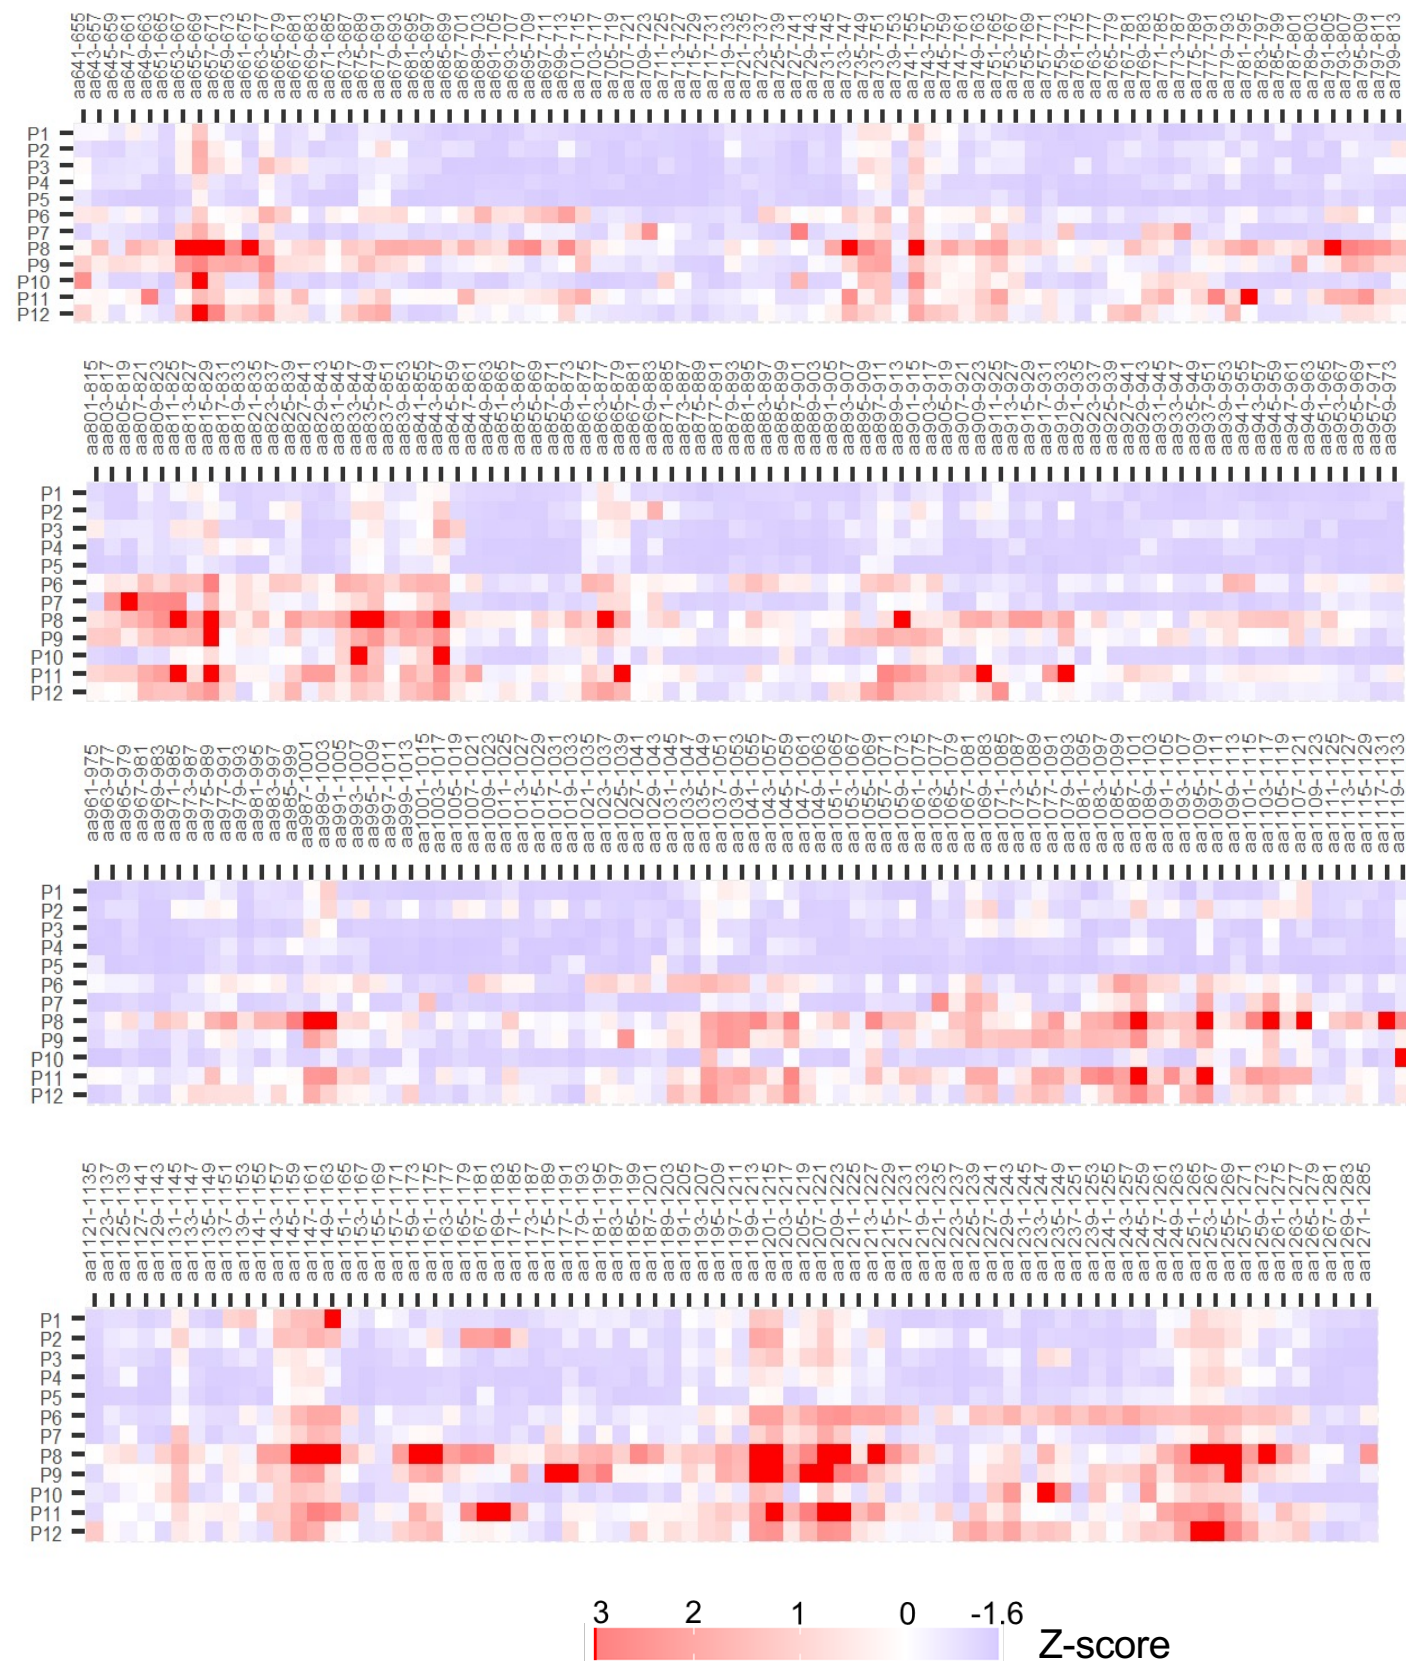



## Nucleocapsid Phosphoprotein

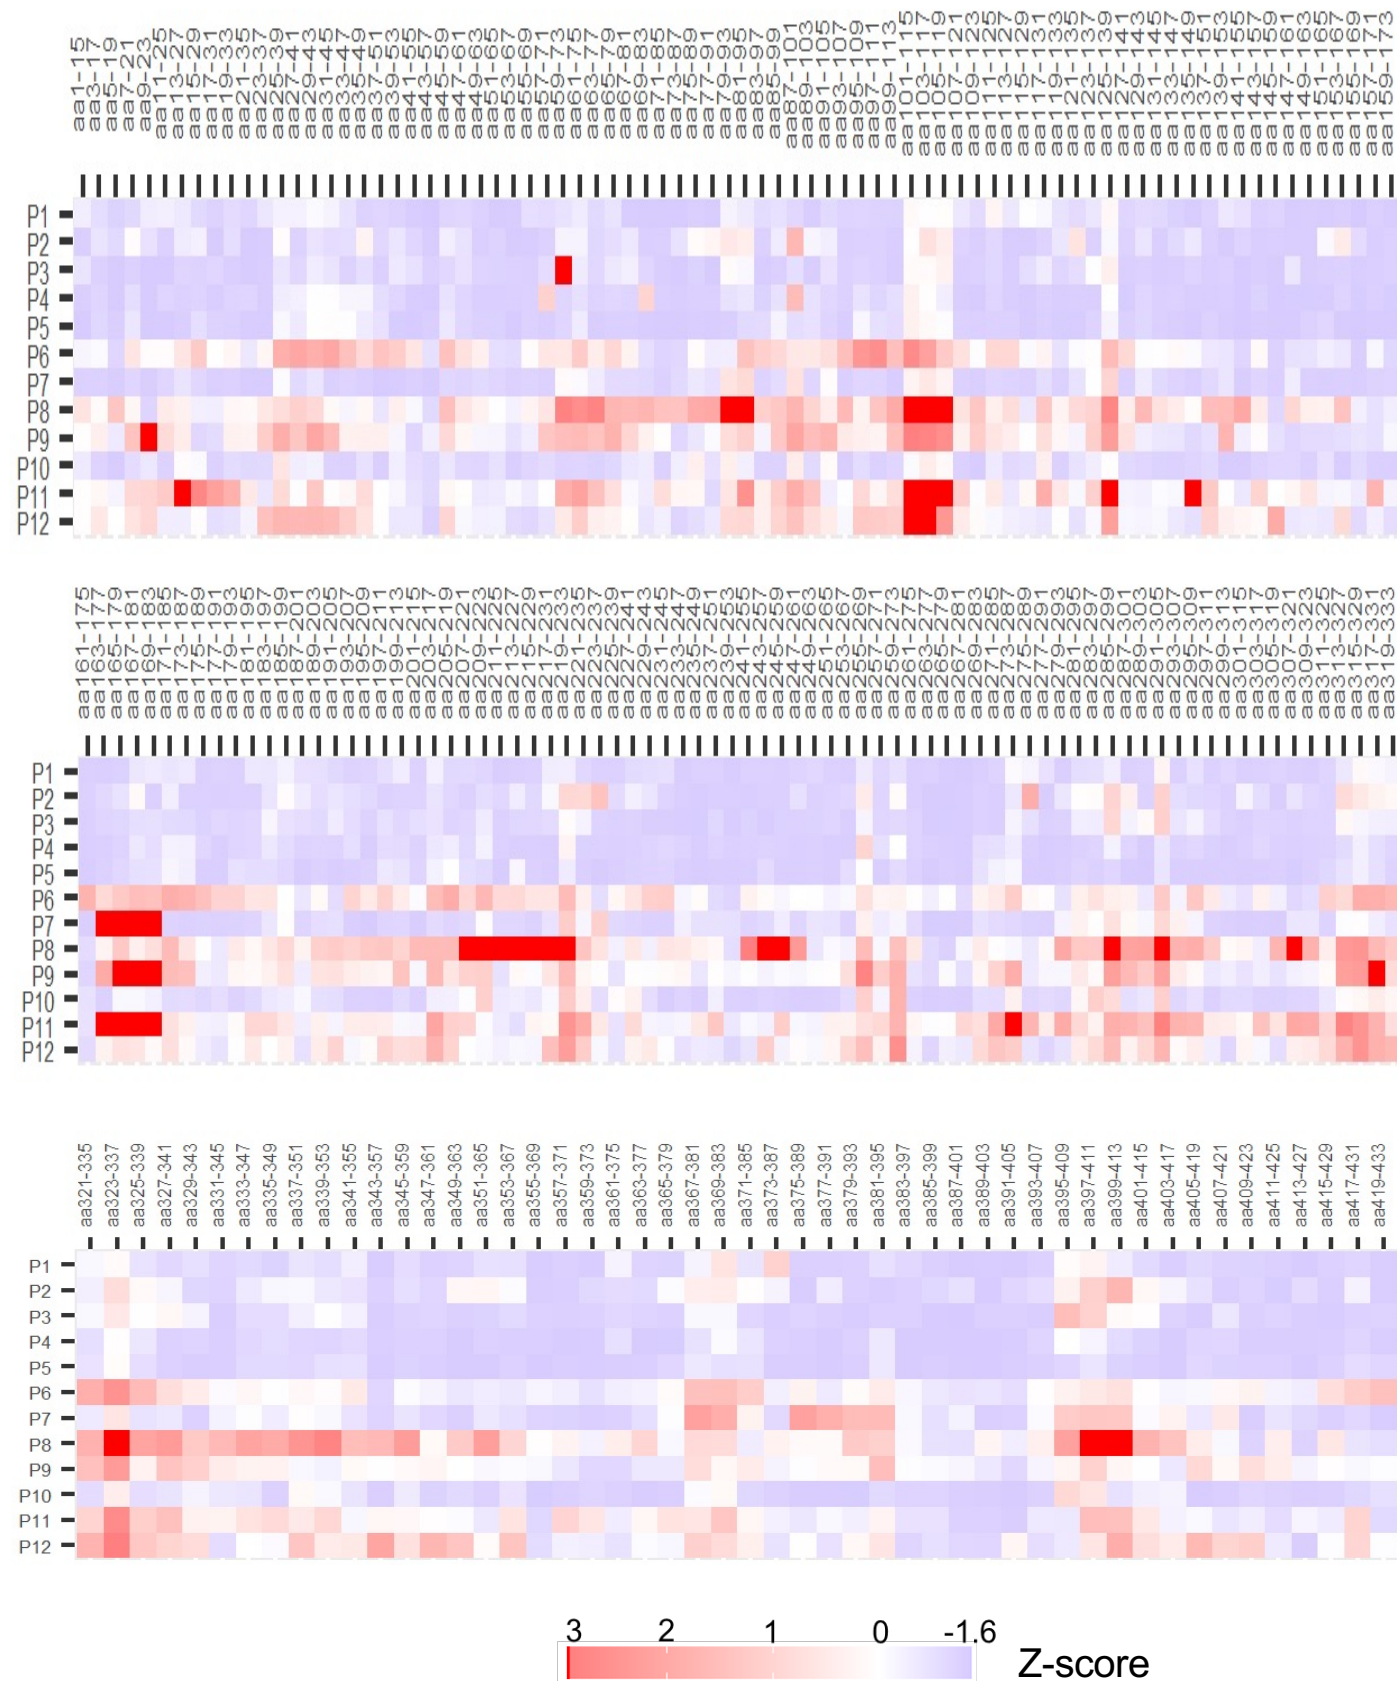



**Supplementary Figure S3a:** Representative dot plots showing patient-wise comparison of IgG response against mutant and wild type peptides i) Orf1ab Polyprotein, T1638A ii) Spike Protein, D138Y (P.1 Manaus)

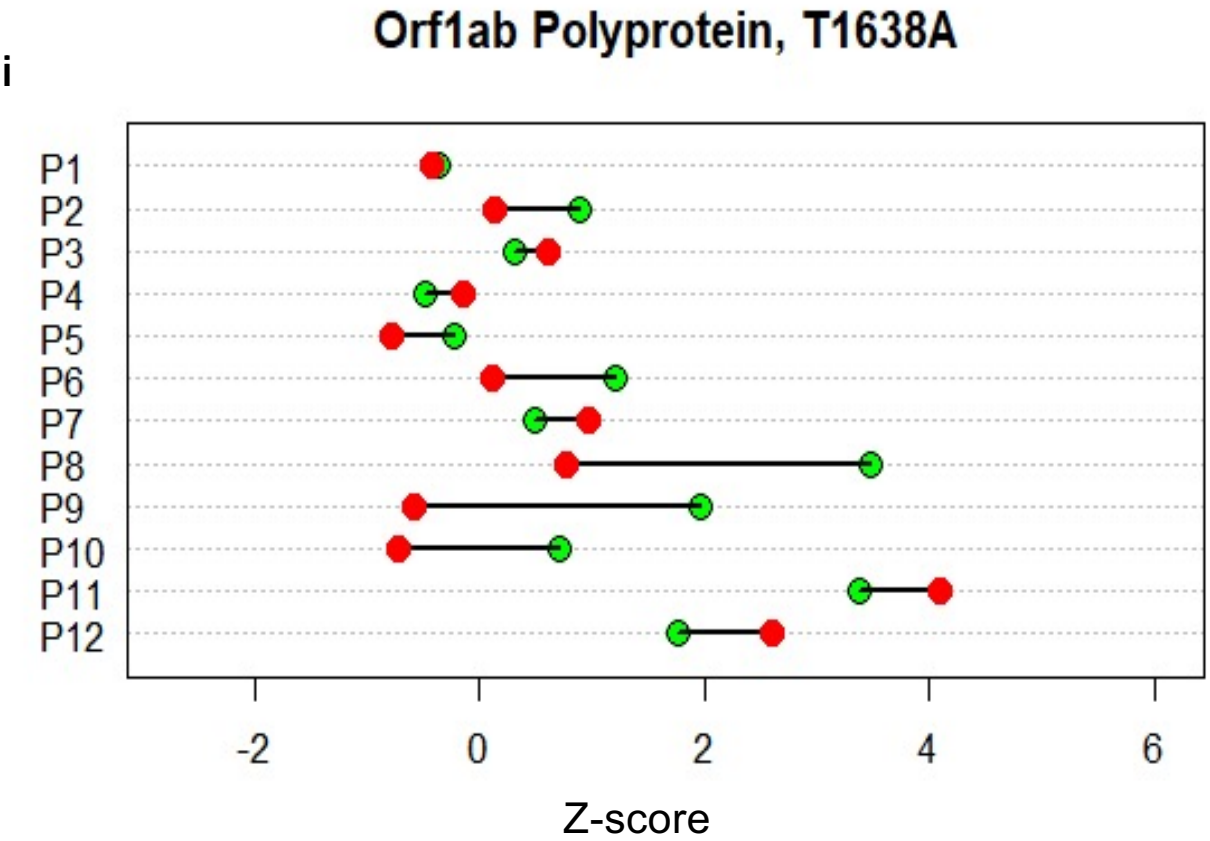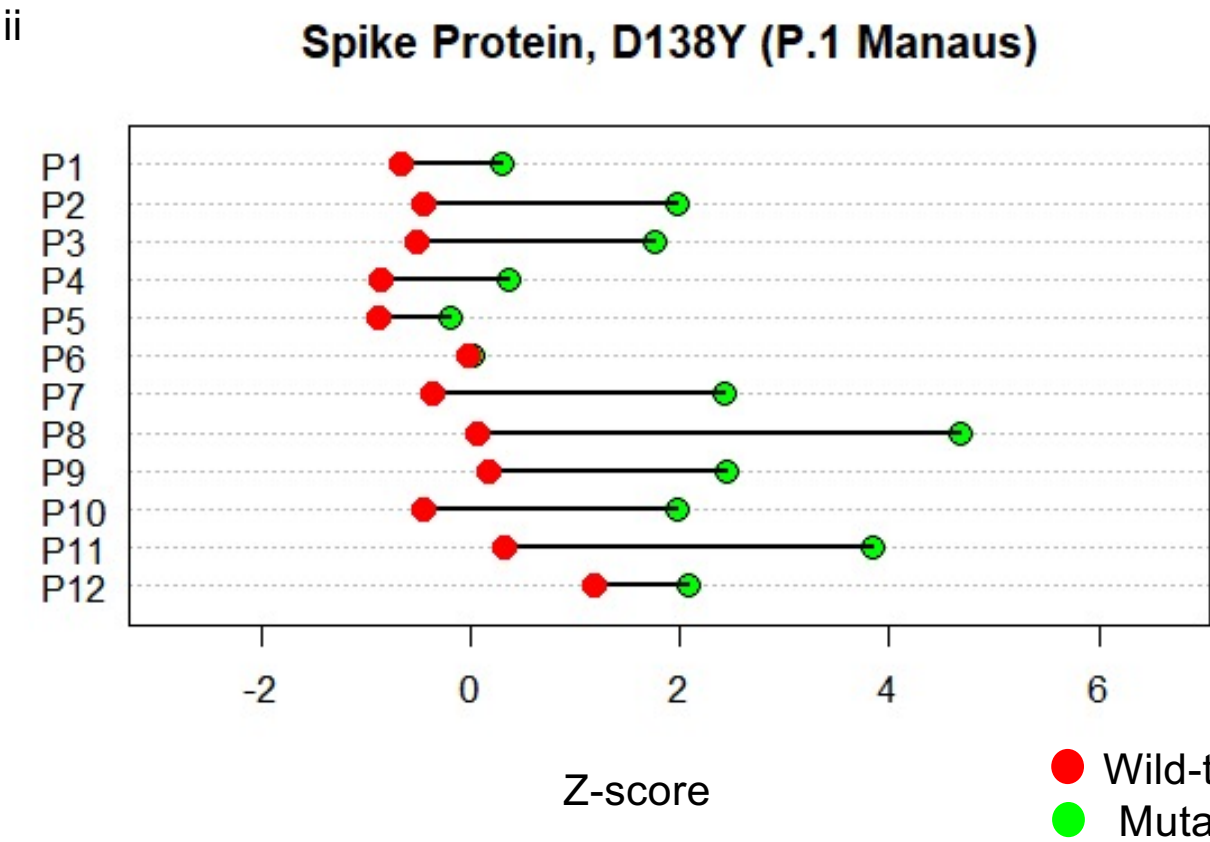



**Supplementary Figure S3b:** Representative dot plots showing patient-wise comparison of IgG response against mutant and wild type peptides i) Spike Protein, D111H (B1.1.7) ii) Spike Protein, H655Y (P.1 Manaus)

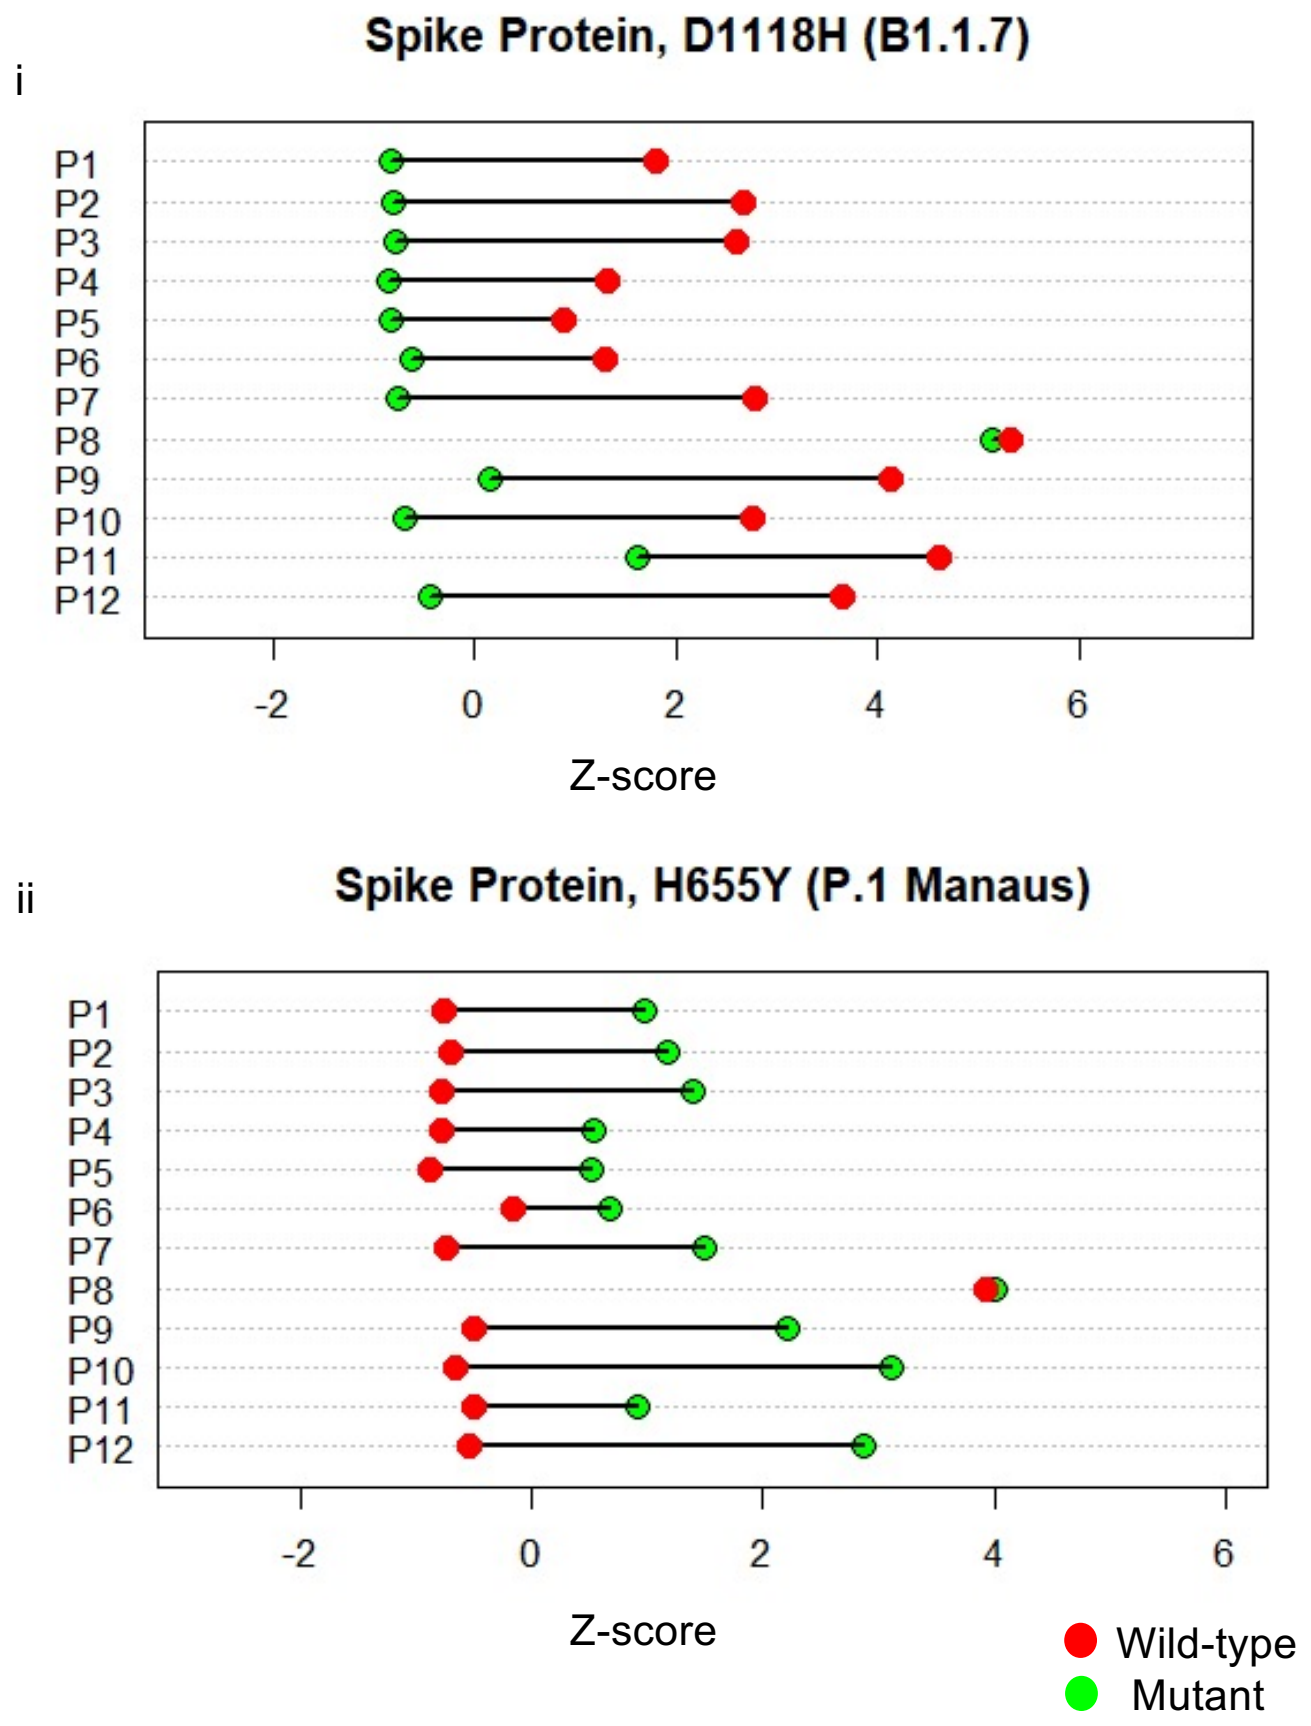



**Supplementary Figure S3c:** Representative dot plots showing patient-wise comparison of IgG response against mutant and wild type peptides i) Nucleocapsid Phosphoprotein, P80R (P.1 Manaus) ii) Orf1ab Polyprotein, V1629A

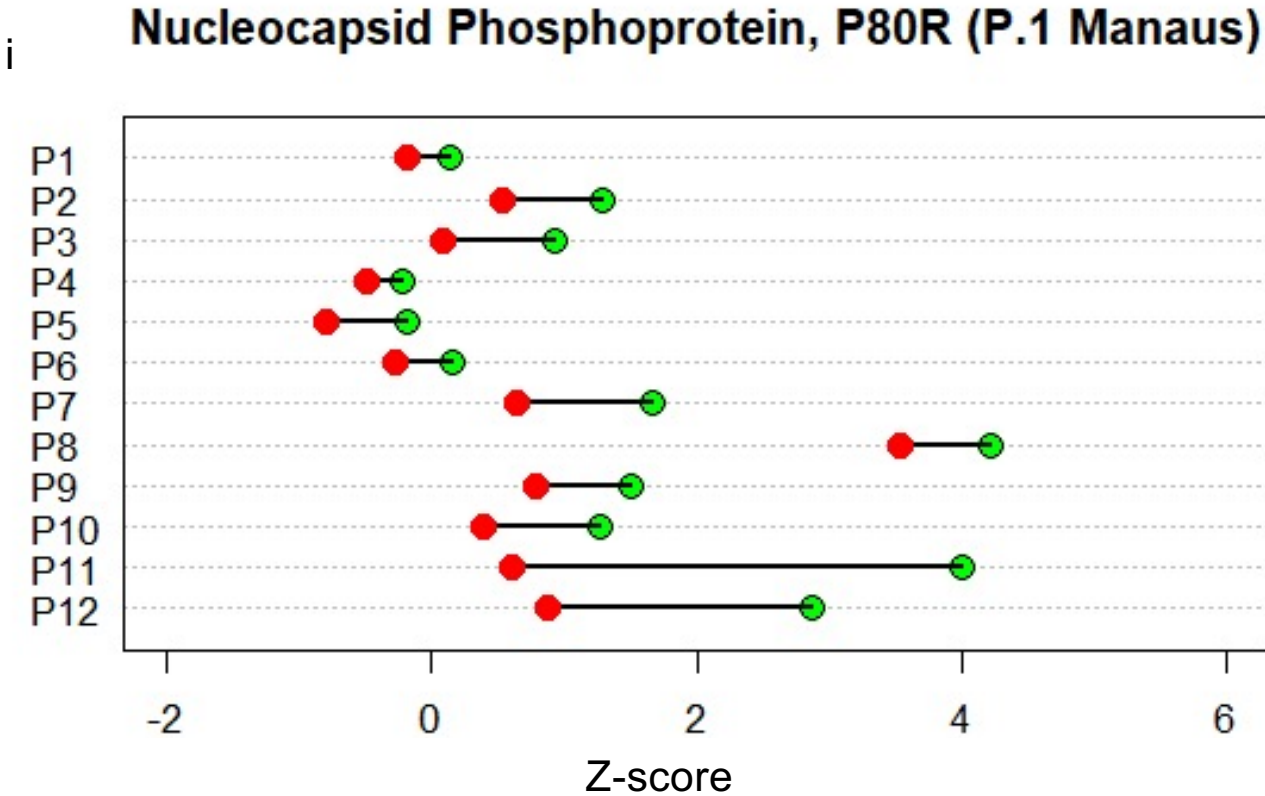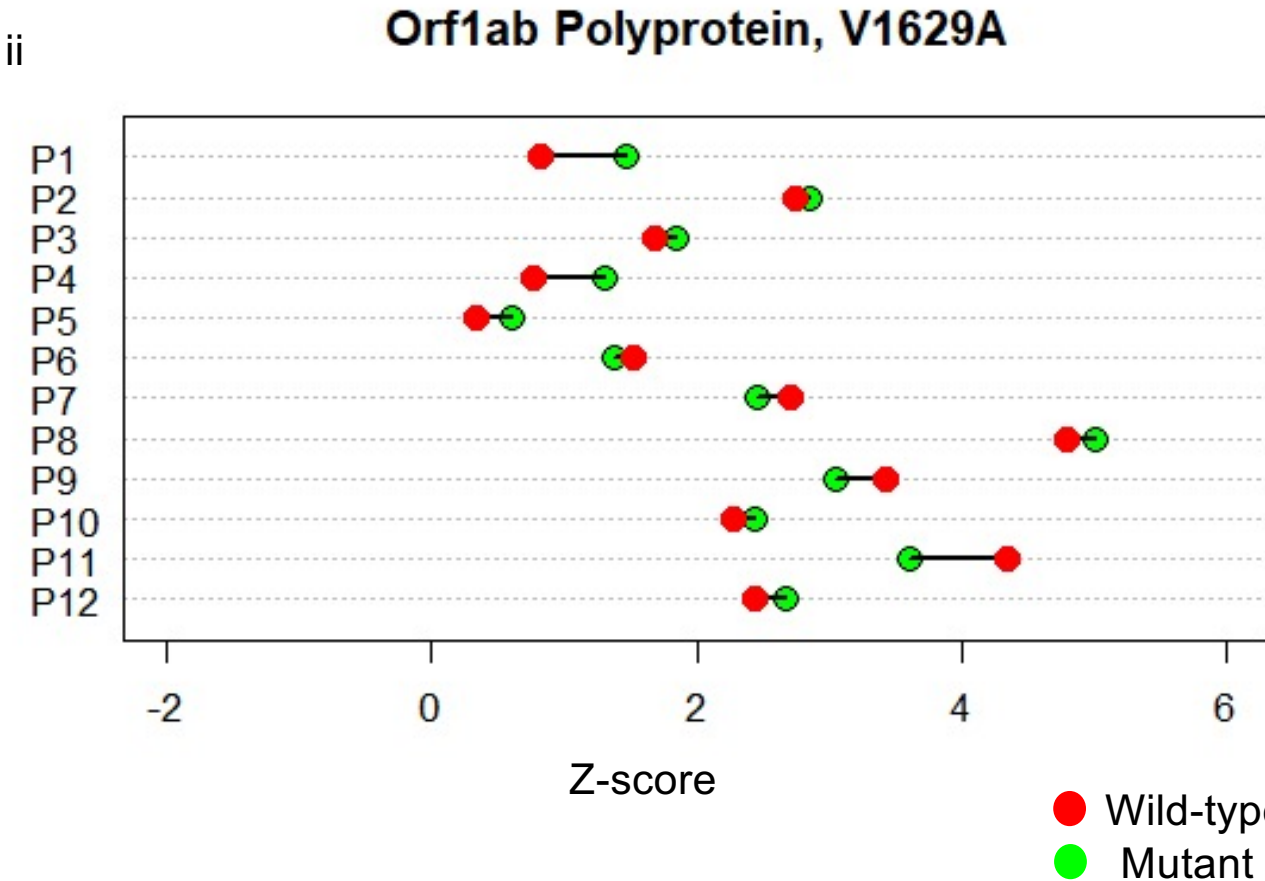



**Supplementary Figure S3d:** Representative dot plots showing patient-wise comparison of IgG response against mutant and wild type peptides i) Spike Protein, R190S (P.1 Manaus) ii) Spike Protein, R246I (501.V2)

i

**Spike Protein, R190S (P.1 Manaus)**

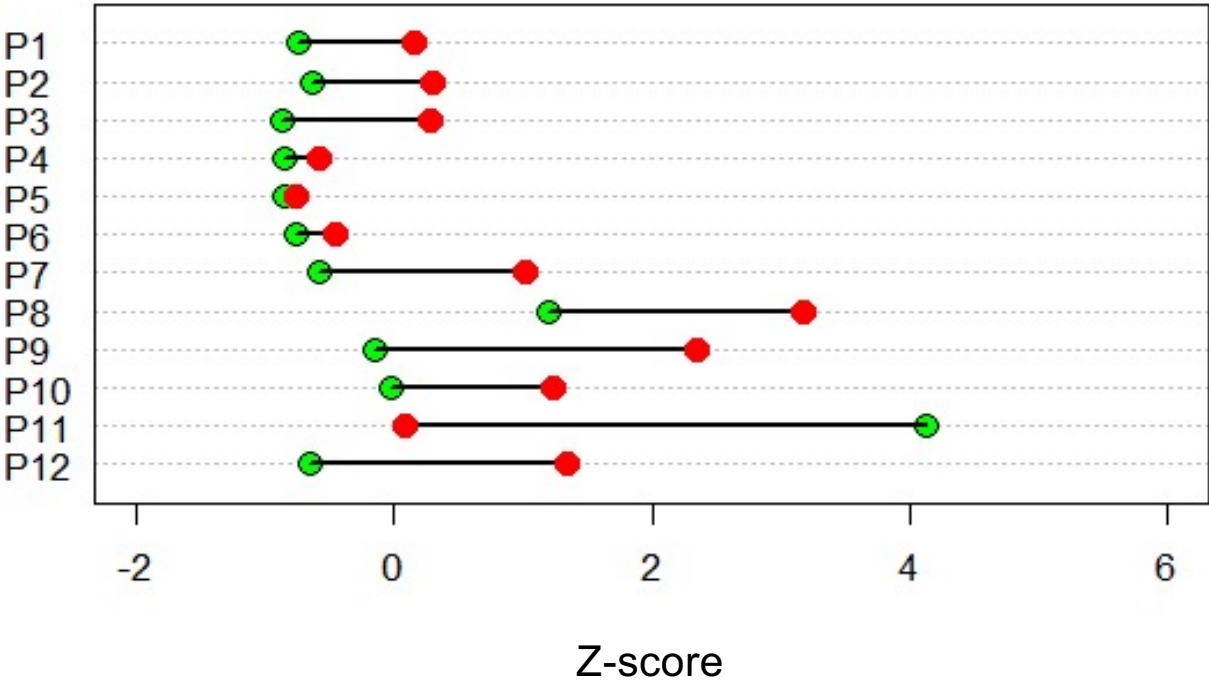

ii

**Spike Protein, R246I (501.V2)**

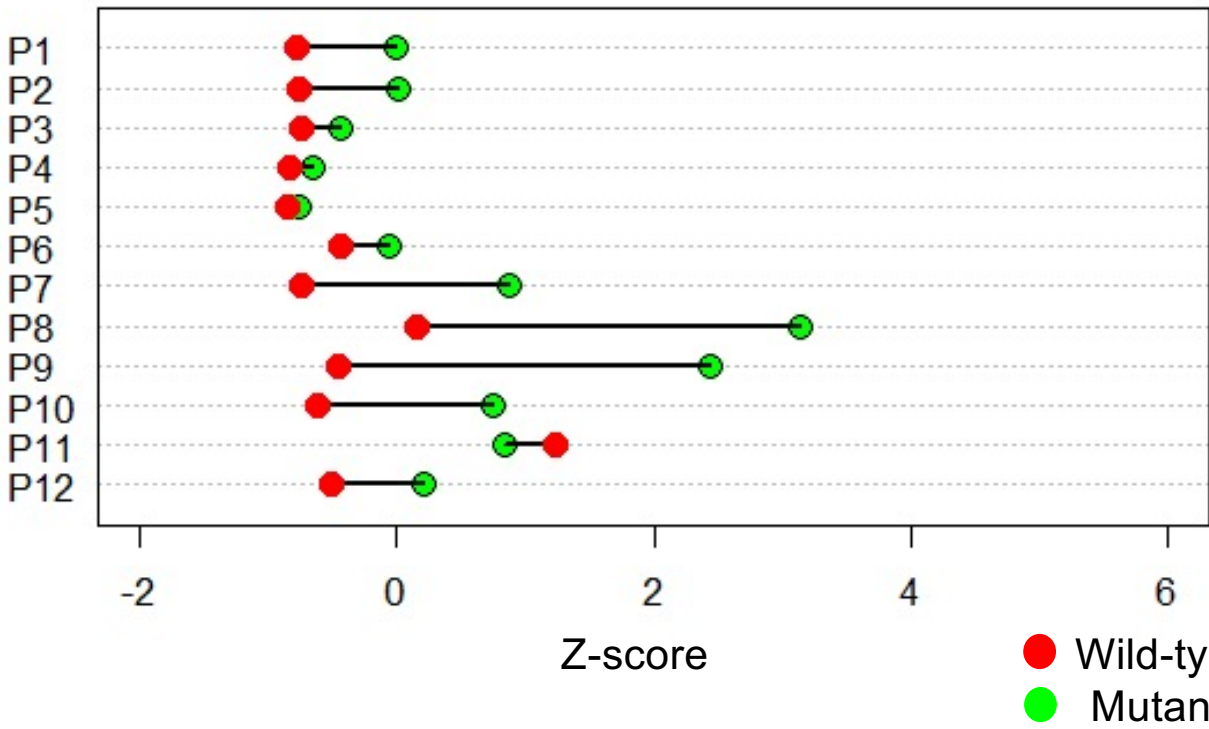



**Supplementary Figure S3e:** Representative dot plots showing patient-wise comparison of IgG response against mutant and wild type peptides i) Spike Protein, N501Y(B1.1.7) ii) Spike Protein, P26S (P.1 Manaus)

i

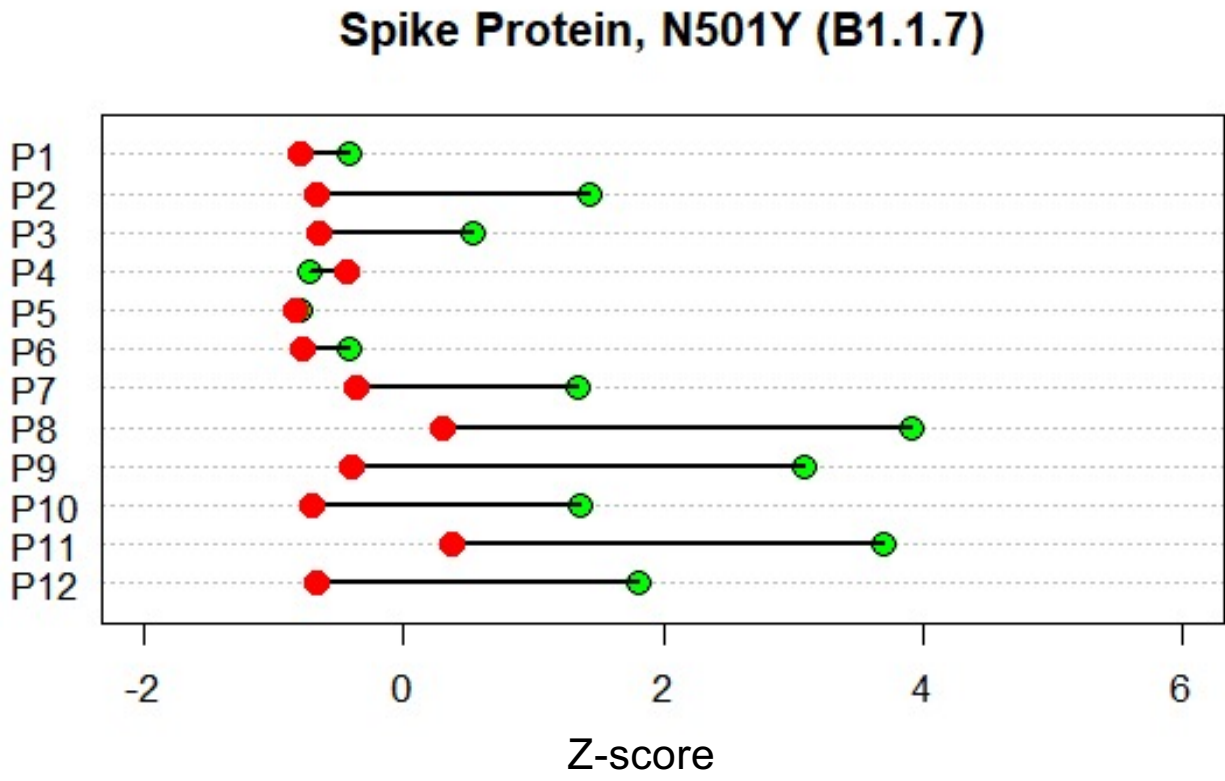

ii

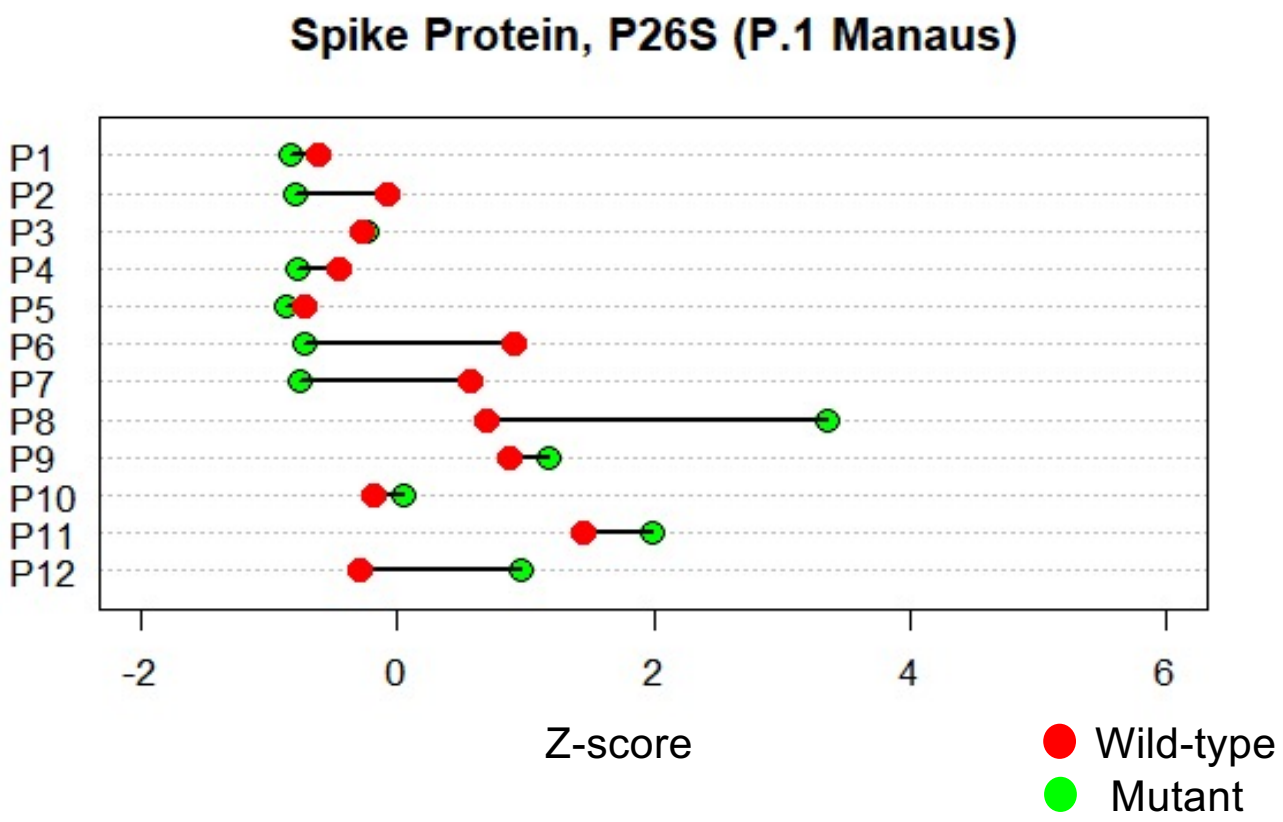



**Supplementary Figure S4a:** Representative dot plots showing patient-wise comparison of IgA response against mutant and wild type i) Spike Protein, D138Y (P.1 Manaus), ii) Spike Protein, H655Y (P.1 Manaus)

i

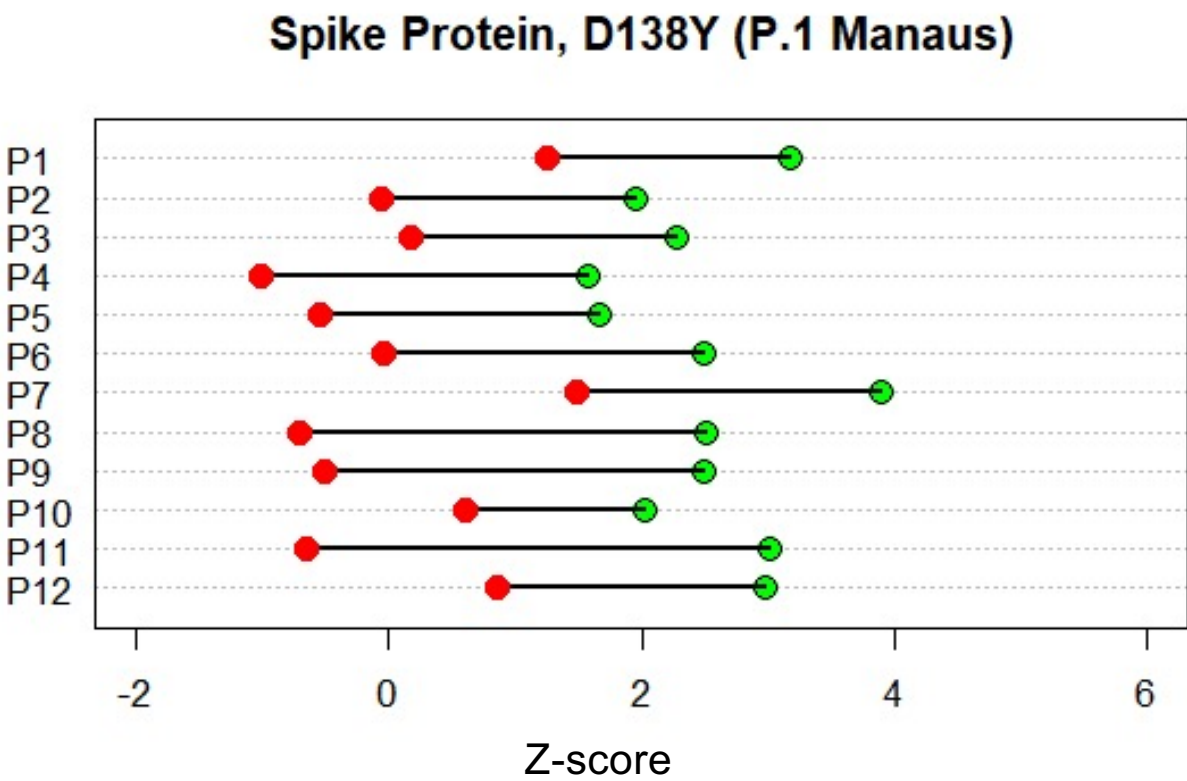

ii

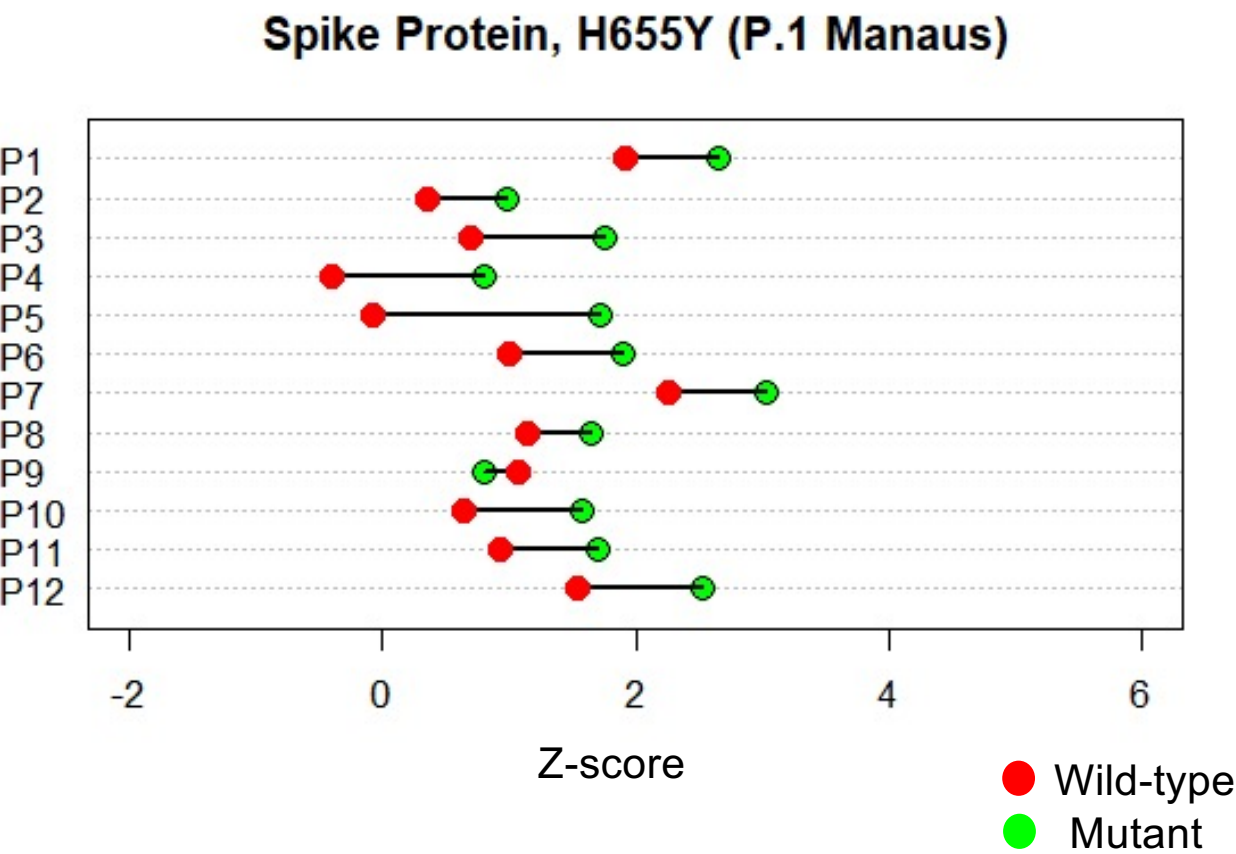

**Supplementary Figure S4b:** Representative dot plots showing patient-wise comparison of IgA response against mutant and wild type peptides i) Nucleocapsid Phosphoprotein, P80R(P.1 Manaus), ii) Orf1ab Polyprotein, V1629A, iii) Spike Protein, N501Y(B1.1.7)

i

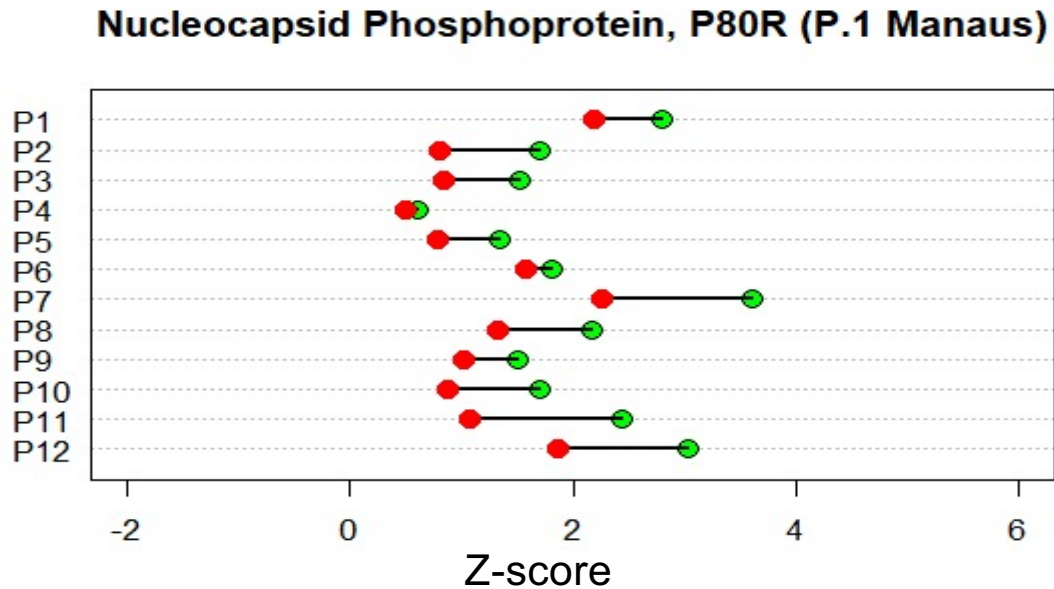

ii

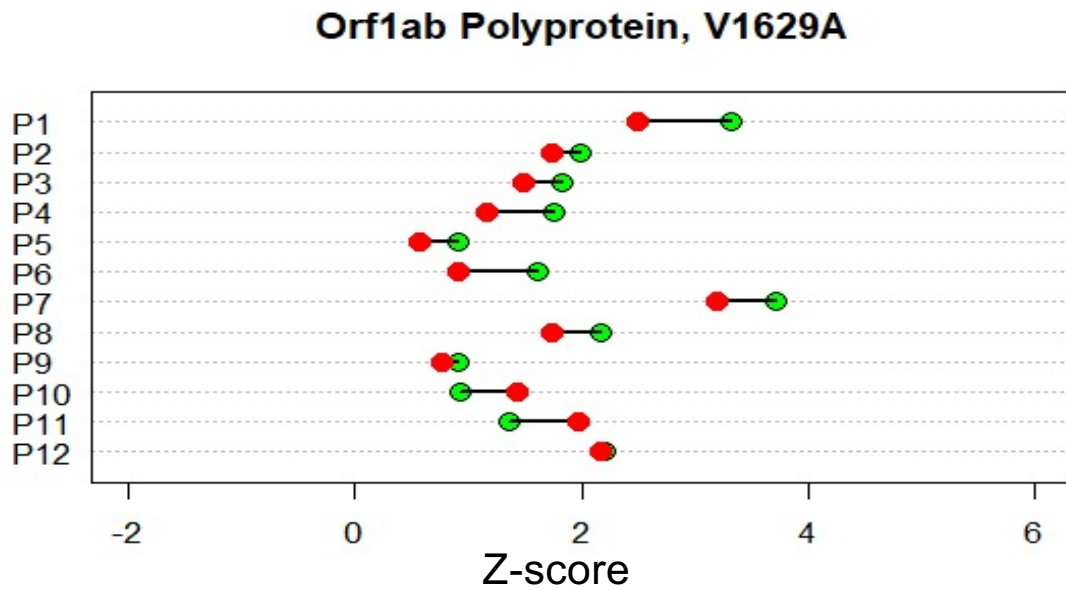

iii

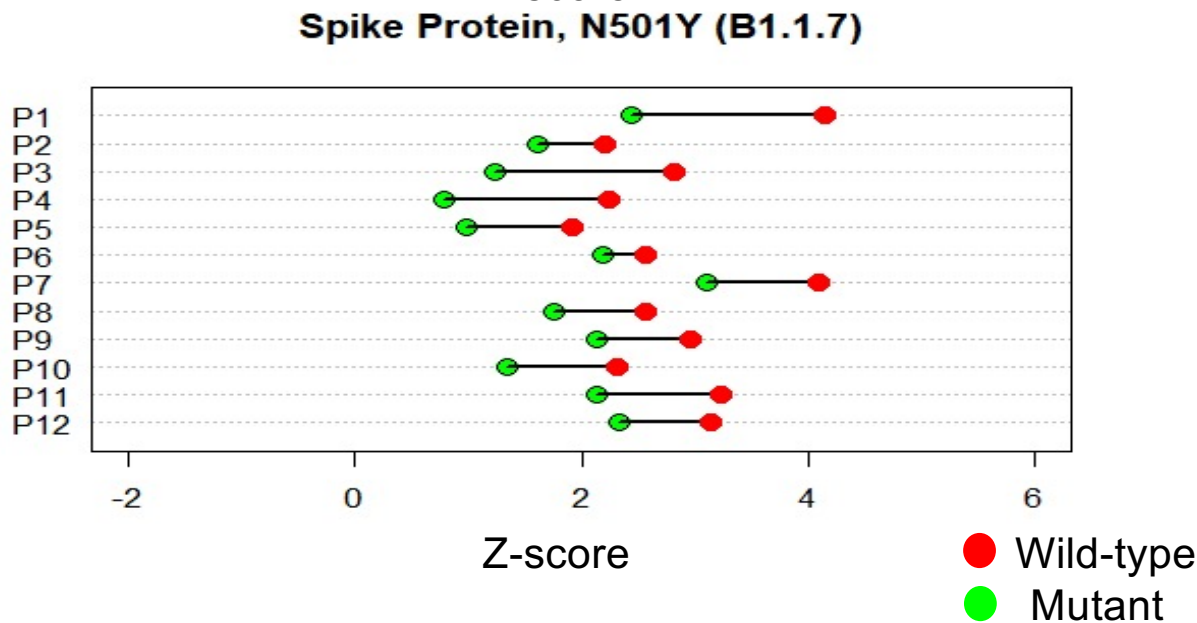

Supplement: s1 [file s1]
