# Supplementary material for: Humoral Immune Response Profile of COVID-19 Reveals Severity and Variant-Specific Epitopes: Lessons from SARS-CoV-2 Peptide Microarray
Source: Viruses. 2023 Jan 15;15(1):248. doi: 10.3390/v15010248 (PMC9866125; doi:10.3390/v15010248)
Supplement: Supplementary file 1 [file viruses-15-00248-s001.zip]

Archive with 11 entries (11 files):
- Supplementary_Figure_Microarray.pdf
- Table S1.docx
- Table S10.docx
- Table S2.docx
- Table S3.docx
- Table S4.docx
- Table S5.docx
- Table S6.docx
- Table S7.docx
- Table S8.docx
- Table S9.docx
